# Supplementary material for: Detecting Cognitive Impairment and Dementia in the Emergency Department: A Scoping Review
Source: PubMed Central journal article supplement — J Am Med Dir Assoc. Author manuscript; Available in PMC 2024 Jan 23. (PMC10804640; doi:10.1016/j.jamda.2022.03.019), 2022-08
Supplement: NIHMS1957960-supplement-1.pdf [file NIHMS1957960-supplement-1.pdf]

## Supplementary Material 1

| Database Searched                              | Date Searched | PICO 1 | PICO 2 |
|------------------------------------------------|---------------|--------|--------|
| MEDLINE (Ovid)                                 | 03/25/2021    | 560    | 890    |
| Cochrane Central Register of Controlled Trials | 03/25/2021    | 75     | 100    |
| Embase (Ovid)                                  | 03/25/2021    | 834    | 1296   |
| CINAHL (Ebsco)                                 | 03/25/2021    | 239    | 323    |
| APA PsycINFO (Ovid)                            | 03/25/2021    | 85     | 107    |
| PubMed Central                                 | 03/25/2021    | 127    | 182    |
| Web of Science                                 | 03/25/2021    | 259    | 361    |
| Total                                          |               | 2160   | 3259   |
| After deduplication: Yale De-duplicator        |               | 1464   | 2173   |
| After deduplication: Covidence De-duplicator   |               | 1456   | 2166   |

## Working Search Methods

The review team collaborated with a research librarian (A.L.B.) to develop and execute a comprehensive search of the literature. The search was created in partnership with several librarians and project team members from the larger GEAR 2.0 effort to conduct several scoping reviews on various topics related to dementia care in the field of emergency medicine. This search combined controlled vocabulary and title/abstract terms related to the accuracy and feasibility of dementia screening tools in the emergency department. The search was adapted from a GEAR 2.0 baseline search to fit the needs of the specific project question and translated for the following databases: MEDLINE (Ovid), Cochrane Central Register of Controlled Trials (CENTRAL), Embase (Ovid), CINAHL (Ebsco), APA PsycINFO (Ovid), PubMed Central, and Web of Science (Clarivate). All searches were performed on March 25, 2021. An exclusion filter from McGill University was used to focus on adult patient populations. No other publication type, language, or date filters were applied. Results were downloaded to a citation management software (EndNote) and underwent automated deduplication using a system at the Cushing/Whitney Medical Library at Yale University. Unique records were uploaded to a screening platform (Covidence) for independent review by several project team members using predetermined inclusion and exclusion criteria.

Used age filter from: <https://libraryguides.mcgill.ca/knowledge-syntheses/search-tools>

- Ovid MEDLINE(R) ALL <1946 to March 24, 2021>
- 1 exp Emergency Medical Services/ 146955
  - 2 Emergency Medicine/ 13903
  - 3 (emergicenter\* or triage\* or unscheduled-acute-care).ti,ab. 20523
  - 4 ((ED or EMS or ER) adj1 (care\* or visit\* or stay\* or admit\* or admission\* or evaluation\* or assess\*)).ti,ab. 12310
  - 5 (trauma adj1 (care\* or support\* or center\* or centre\* or department\* or unit\* or room\* or ward\* or service\*)).ti,ab. 23093
  - 6 ((Emergency or emergencies) adj2 (admit\* or admission\* or care\* or treatment\* or service\* or dispatch\* or department\* or unit\* or ward\* or room\* or center\* or centre\* or system\* or personnel\* or physician\* or provider\* or doctor\* or nurs\* or patient\*)).ti,ab. 169983
  - 7 or/1-6 273992
  - 8 exp Dementia/ 172364
  - 9 (dementia\* or amentia\* or demention\* or CADASIL or Alzheimer\* or Creutzfeldt-Jakob or Huntington\* or Lewy-Bod\*).ti,ab. 248697
  - 10 Cognitive Dysfunction/ 20913
  - 11 Cognition Disorders/ 64841
  - 12 ((cognit\* or neurocognit\* or frontotemporal) adj2 (disorder\* or defect\* or deficit\* or decline\* or deteriorat\* or disabilit\* or dysfunction\* or disfunction\* or impaired or impairment\* or interferen\*)).ti,ab. 138648
  - 13 or/8-12 389398

- 14 exp "Diagnostic Techniques and Procedures"/ 7441551
  - 15 di.fs. 2635879
  - 16 exp "Mental Status and Dementia Tests"/ 8157
  - 17 exp Geriatric Assessment/ 28853
  - 18 exp Neuropsychological Tests/ 181403
  - 19 ((mental\* or cognitive\* or cognition\* or orientation\* or agitation\* or memory\* or concentration\* or dementia\* or mini-cog\* or mini-mental\* or neurocognit\*) adj3 (assess\* or test\* or eval\* or screen\* or question\* or exam\* or scale\* or calculator\*)).ti,ab. 190997
  - 20 Montreal cognitive assessment.ti,ab. 3256
  - 21 MOCA.ti,ab. 2881
  - 22 Mini-Mental Status Examination.ti,ab. 1037
  - 23 MMSE.ti,ab. 11543
  - 24 Saint Louis University Mental Status.ti,ab. 37
  - 25 SLUMS.ti,ab. 1701
  - 26 "AD8".ti,ab. 228
  - 27 Quick Dementia Rating System.ti,ab. 7
  - 28 QDRS.ti,ab. 7
  - 29 or/14-28 8937325
  - 30 7 and 13 and 29 1041
  - 31 [Accuracy Outcome Concept-For PICO 1] 0
  - 32 exp "Sensitivity and Specificity"/ 601726
  - 33 exp "Models, Theoretical"/ 1818464
  - 34 exp "Reproducibility of Results"/ 414121
  - 35 (accurac\* or accurate\* or reproducib\* or specificit\* or sensitivity\* or likelihood\* or like-lihood\* or statistic\* or analysis\* or analyses\* or analyze\* or mathematic\* or calculation\* or ratio\* or probabilit\* or estimat\* or false-positive\* or false-negative\* or true-positive\* or true-negative\* or concept\* or theoretical\*).ti,ab. 9626627
  - 36 or/32-35 10701541
  - 37 [Pragmatic Concept-For PICO 2] 0
  - 38 (pragmati\* or practical\* or feasibilit\* or usabilit\* or acceptabilit\* or acceptance\*).ti,ab. 598307
  - 39 ease-of-use.ti,ab. 10062
  - 40 (organization\* or organisation\* or administration\* or method\* or standard\* or instrument\* or tool\*).ti,ab. 8787459
  - 41 exp "Organization and Administration"/ 1530624
  - 42 og.fs. 492823
  - 43 exp Methods/ 692757
  - 44 mt.fs. 3938387
  - 45 st.fs. 742607
  - 46 is.fs. 673805
  - 47 (education\* or training\* or learn\* or simulation\*).ti,ab. 1587309
  - 48 exp Education/ 828249
  - 49 ed.fs. 285229
  - 50 exp "Task Performance and Analysis"/ 36465
  - 51 time/ or time factors/ 1216614
  - 52 (time\* or timing\*).ti,ab. 3964012
  - 53 Automation/ 18746
  - 54 (automated\* or automation\*).ti,ab. 132404
  - 55 or/38-54 15388882
  - 56 [PICO 1: Combined & filtered] 0
  - 57 30 and 36 579
  - 58 (exp infant/ or exp child/ or adolescent/) not exp adult/ 1920361
  - 59 57 not 58 560
  - 60 [PICO 2: Combined & filtered] 0
  - 61 30 and 55 936
  - 62 (exp infant/ or exp child/ or adolescent/) not exp adult/ 1920361
  - 63 61 not 62 890
- Embase <1974 to 2021 March 24>
- 1 exp Emergency Health Service/ 108608
  - 2 Emergency Medicine/ 42258
  - 3 exp Emergency Ward/ 160076
  - 4 exp emergency physician/ 131518

5 exp Emergency Nurse Practitioner/ 337  
 6 exp Emergency Nursing/ 6697  
 7 exp Emergency Patient/ 3803  
 8 (emergicenter\* or Triage\* or unscheduled-acute-care).ti,ab. 32081  
 9 ((ED or EMS or ER) adj1 (care\* or visit\* or stay\* or admit\* or admission\* or evaluation\* or assess\*)),ti,ab. 25141  
 10 (trauma adj1 (care\* or support\* or center\* or centre\* or department\* or unit\* or room\* or ward\* or service\*)),ti,ab. 29792  
 11 ((Emergency or emergencies) adj2 (admit\* or admission\* or care\* or treatment\* or service\* or dispatch\* or department\* or unit\* or ward\* or room\* or center\* or centre\* or system\* or personnel\* or physician\* or provider\* or doctor\* or nurs\* or patient\*)),ti,ab. 258392  
 12 or/1-11 404652  
 13 exp Dementia/ 377840  
 14 (dementia\* or amentia\* or demention\* or CADASIL or Alzheimer\* or Creutzfeldt-Jakob or Huntington\* or Lewy-Bod\*).ti,ab. 347273  
 15 exp Cognitive Defect/ 516020  
 16 ((cognit\* or neurocognit\* or frontotemporal) adj2 (disorder\* or defect\* or deficit\* or decline\* or deteriorat\* or disabilit\* or dysfunction\* or disfunction\* or impaired or impairment\* or interference\*)),ti,ab. 213817  
 17 or/13-16 617546  
 18 clinical assessment/ 171905  
 19 exp dementia assessment/ 50912  
 20 di.fs. 3232060  
 21 exp geriatric assessment/ 17751  
 22 ((mental\* or cognitive\* or cognition\* or orientation\* or agitation\* or memory\* or concentration\* or dementia\* or mini-cog\* or mini-mental\* or neurocognit\*) adj3 (assess\* or test\* or eval\* or screen\* or question\* or exam\* or scale\* or calculator\*)),ti,ab. 266911  
 23 montreal cognitive assessment/ 7784  
 24 Montreal cognitive assessment.ti,ab. 6548  
 25 MOCA.ti,ab. 7287  
 26 exp Mini Mental State Examination/ 42152  
 27 Mini-Mental Status Examination.ti,ab. 1807  
 28 MMSE.ti,ab. 24764  
 29 Saint Louis University Mental Status.ti,ab. 70  
 30 SLUMS.ti,ab. 1925  
 31 "AD8".ti,ab. 353  
 32 Quick Dementia Rating System.ti,ab. 7  
 33 QDRS.ti,ab. 10  
 34 or/18-33 3642188  
 35 [Accuracy Outcome Concept–For PICO 1] 0  
 36 exp diagnostic test accuracy study/ or exp diagnostic accuracy/ or exp accuracy/ 528272  
 37 exp "sensitivity and specificity"/ 388710  
 38 exp statistical analysis/ 2597960  
 39 exp conceptual framework/ 29130  
 40 (accurac\* or accurate\* or reproducib\* or specificit\* or sensitivity\* or likelihood\* or like-lihood\* or statistic\* or analysis\* or analyses\* or analyze\* or mathematic\* or calculation\* or ratio\* or probabilit\* or estimat\* or false-positive\* or false-negative\* or true-positive\* or true-negative\* or concept\* or theoretical\*).ti,ab. 12457155  
 41 or/36-40 13240261  
 42 [Pragmatic Concept–For PICO 2] 0  
 43 (pragmati\* or practical\* or feasibilit\* or usabilit\* or acceptabilit\* or acceptance\*).ti,ab. 767362  
 44 ease-of-use.ti,ab. 14290  
 45 (organization\* or organisation\* or administration\* or method\* or standard\* or instrument\* or tool\*).ti,ab. 12490561  
 46 exp "organization and management"/ 2101767  
 47 (education\* or training\* or learn\* or simulation\*).ti,ab. 1980963

48 exp education/ 1482404  
 49 task performance/ 145790  
 50 exp time/ 635316  
 51 (time\* or timing\*).ti,ab. 5368545  
 52 automation/ or exp autoanalysis/ 66802  
 53 (automated\* or automation\*).ti,ab. 188393  
 54 or/43-53 17314801  
 55 [PICO 1 Combined & filtered] 0  
 56 12 and 17 and 34 and 41 834  
 57 56 not (exp juvenile/ not exp adult/) 815  
 58 [PICO 2 Combined & filtered] 0  
 59 12 and 17 and 34 and 54 1337  
 60 59 not (exp juvenile/ not exp adult/) 1296  
 APA PsycInfo <1806 to March Week 3 2021>  
 1 exp Emergency Medicine/ 357  
 2 exp Emergency Personnel/ 11799  
 3 (emergicenter\* or Triage\* or unscheduled-acute-care).ti,ab. 1651  
 4 ((ED or EMS or ER) adj1 (care\* or visit\* or stay\* or admit\* or admission\* or evaluation\* or assess\*)),ti,ab. 1667  
 5 (trauma adj1 (care\* or support\* or center\* or centre\* or department\* or unit\* or room\* or ward\* or service\*)),ti,ab. 1510  
 6 ((Emergency or emergencies) adj2 (admit\* or admission\* or care\* or treatment\* or service\* or dispatch\* or department\* or unit\* or ward\* or room\* or center\* or centre\* or system\* or personnel\* or physician\* or provider\* or doctor\* or nurs\* or patient\*)),ti,ab. 17905  
 7 or/1-6 32107  
 8 exp Dementia/ 80210  
 9 (dementia\* or amentia\* or demention\* or CADASIL or Alzheimer\* or Creutzfeldt-Jakob or Huntington\* or Lewy-Bod\*).ti,ab. 106861  
 10 ((cognit\* or neurocognit\* or frontotemporal) adj2 (disorder\* or defect\* or deficit\* or decline\* or deteriorat\* or disabilit\* or dysfunction\* or disfunction\* or impaired or impairment\* or interference\*)),ti,ab. 80069  
 11 or/8-10 161116  
 12 exp Diagnostic Criteria/ 3425  
 13 exp Geriatric Assessment/ 1063  
 14 neuropsychological assessment/ 15227  
 15 ((mental\* or cognitive\* or cognition\* or orientation\* or agitation\* or memory\* or concentration\* or dementia\* or mini-cog\* or mini-mental\* or neurocognit\*) adj3 (assess\* or test\* or eval\* or screen\* or question\* or exam\* or scale\* or calculator\*)),ti,ab. 126181  
 16 Montreal cognitive assessment.ti,ab. 1263  
 17 MOCA.ti,ab. 1034  
 18 mini mental state examination/ 777  
 19 Mini-Mental Status Examination.ti,ab. 536  
 20 MMSE.ti,ab. 6091  
 21 Saint Louis University Mental Status.ti,ab. 16  
 22 SLUMS.ti,ab. 472  
 23 "AD8".ti,ab. 44  
 24 or/12-23 141849  
 25 7 and 11 and 24 146  
 26 [Accuracy Outcome Concept–For PICO 1] 0  
 27 test sensitivity/ 308  
 28 models/ 70462  
 29 test validity/ or clinical validity/ 80831  
 30 (accurac\* or accurate\* or reproducib\* or specificit\* or sensitivity\* or likelihood\* or like-lihood\* or statistic\* or analysis\* or analyses\* or analyze\* or mathematic\* or calculation\* or ratio\* or probabilit\* or estimat\* or false-positive\* or false-negative\* or true-positive\* or true-negative\* or concept\* or theoretical\*).ti,ab. 2064410  
 31 or/27-30 2122572  
 32 [Pragmatic Concept–For PICO 2] 0  
 33 pragmatics/ 5210

34 (pragmati\* or practical\* or feasibilit\* or usabilit\* or acceptabilit\* or acceptance\*).ti,ab. 229448  
 35 ease-of-use.ti,ab. 2901  
 36 test administration/ 3277  
 37 (organization\* or organisation\* or administration\* or method\* or standard\* or instrument\* or tool\*).ti,ab. 1528305  
 38 exp Testing Methods/ 14401  
 39 exp training/ 78601  
 40 exp Time/ 20131  
 41 (time\* or timing\*).ti,ab. 737235  
 42 exp Automation/ 2457  
 43 (automated\* or automation\*).ti,ab. 14229  
 44 or/33-43 2160738  
 45 [PICO 1: Combined only] 0  
 46 25 and 31 85  
 47 [PICO 2: Combined only] 0  
 48 25 and 44 107

## Web of Science

## PICO 1

# 13

259

#12

Indexes=SCI-EXPANDED, CPCI-S, ESCI Timespan=All years

# 12

264

#11 AND #10 AND #7 AND #4

Indexes=SCI-EXPANDED, SSCI, A&amp;HCI, CPCI-S, CPCI-SSH, BKCI-S, BKCI-SSH, ESCI, CCR-EXPANDED, IC Timespan=All years

# 11

21,509,659

TS=(accurac\* or accurate\* or reproducib\* or specificit\* or sensitivity\* or likelihood\* or like-lihood\* or statistic\* or analysis\* or analyses\* or analyze\* or mathematic\* or calculation\* or ratio\* or probabilit\* or estimat\* or false-positive\* or false-negative\* or true-positive\* or

true-negative\* or concept\* or theoretical\*)

Indexes=SCI-EXPANDED, SSCI, A&amp;HCI, CPCI-S, CPCI-SSH, BKCI-S, BKCI-SSH, ESCI, CCR-EXPANDED, IC Timespan=All years

# 10

324,054

#9 OR #8

Indexes=SCI-EXPANDED, SSCI, A&amp;HCI, CPCI-S, CPCI-SSH, BKCI-S, BKCI-SSH, ESCI, CCR-EXPANDED, IC Timespan=All years

# 9

35,680

TS=(Montreal cognitive assessment OR MOCA OR Mini-Mental Status Examination OR MMSE OR Saint Louis University Mental Status OR SLUMS OR "AD8" OR Quick Dementia Rating System OR QDR)

Indexes=SCI-EXPANDED, SSCI, A&amp;HCI, CPCI-S, CPCI-SSH, BKCI-S, BKCI-SSH, ESCI, CCR-EXPANDED, IC Timespan=All years

# 8

303,271

TS=((mental\* or cognitive\* or cognition\* or orientation\* or agitation\* or memory\* or concentration\* or dementia\* or mini-cog\* or mini-mental\* or neurocognit\*) NEAR/3

(assess\* or test\* or eval\* or screen\* or question\* or exam\* or scale\* or calculator\*)

Indexes=SCI-EXPANDED, SSCI, A&amp;HCI, CPCI-S, CPCI-SSH, BKCI-S, BKCI-SSH, ESCI, CCR-EXPANDED, IC Timespan=All years

# 7

490,311

#6 OR #5

Indexes=SCI-EXPANDED, SSCI, A&amp;HCI, CPCI-S, CPCI-SSH, BKCI-S, BKCI-SSH, ESCI, CCR-EXPANDED, IC Timespan=All years

# 6

194,671

TS=((cognit\* or neurocognit\* or frontotemporal) NEAR/2 (disorder\* or defect\* or deficit\* or decline\* or deteriorat\* or disabilit\* or dysfunction\* or disfunction\* or impaired or impairment\* or interference\*))

Indexes=SCI-EXPANDED, SSCI, A&amp;HCI, CPCI-S, CPCI-SSH, BKCI-S, BKCI-SSH, ESCI, CCR-EXPANDED, IC Timespan=All years

# 5

381,017

TS=(dementia\* or amentia\* or demention\* or CADASIL or Alzheimer\* or Creutzfeldt-Jakob or Huntington\* or Lewy-Bod\*)

Indexes=SCI-EXPANDED, SSCI, A&amp;HCI, CPCI-S, CPCI-SSH, BKCI-S, BKCI-SSH, ESCI, CCR-EXPANDED, IC Timespan=All years

# 4

206,166

#3 OR #2 OR #1

Indexes=SCI-EXPANDED, SSCI, A&amp;HCI, CPCI-S, CPCI-SSH, BKCI-S, BKCI-SSH, ESCI, CCR-EXPANDED, IC Timespan=All years

# 3

183,526

TS=((Emergency or emergencies) NEAR/2 (admit\* or admission\* or care\* or treatment\* or service\* or dispatch\* or department\* or unit\* or ward\* or room\* or center\* or centre\* or system\* or personnel\* or physician\* or provider\* or doctor\* or nurs\* or patient\*))

Indexes=SCI-EXPANDED, SSCI, A&amp;HCI, CPCI-S, CPCI-SSH, BKCI-S, BKCI-SSH, ESCI, CCR-EXPANDED, IC Timespan=All years

# 2

25,620

TS=(trauma NEAR/1 (care\* or support\* or center\* or centre\* or department\* or unit\* or room\* or ward\* or service\*))

Indexes=SCI-EXPANDED, SSCI, A&amp;HCI, CPCI-S, CPCI-SSH, BKCI-S, BKCI-SSH, ESCI, CCR-EXPANDED, IC Timespan=All years

# 1

14,077

TS=((ED or EMS or ER) NEAR/1 (care\* or visit\* or stay\* or admit\* or admission\* or evaluation\* or assess\*))

Indexes=SCI-EXPANDED, SSCI, A&amp;HCI, CPCI-S, CPCI-SSH, BKCI-S, BKCI-SSH, ESCI, CCR-EXPANDED, IC Timespan=All years

Web of Science

PICO 2

# 13

361

#12

Indexes=SCI-EXPANDED, CPCI-S, ESCI Timespan=All years

# 12

375

#11 AND #10 AND #7 AND #4

Indexes=SCI-EXPANDED, SSCI, A&amp;HCI, CPCI-S, CPCI-SSH, BKCI-S, BKCI-SSH, ESCI, CCR-EXPANDED, IC Timespan=All years

# 11

24,214,287

TS=(pragmati\* or practical\* or feasibilit\* or usabilit\* or acceptabilit\* or acceptance\* or ease-of-use or organization\* or organisation\* or administration\* or method\* or standard\* or instrument\* or tool\* or education\* or training\* or learn\* or simulation\* or time\* or timing\* or automated\* or automation\*)

Indexes=SCI-EXPANDED, SSCI, A&amp;HCI, CPCI-S, CPCI-SSH, BKCI-S, BKCI-SSH, ESCI, CCR-EXPANDED, IC Timespan=All years

# 10

324,054

#9 OR #8

Indexes=SCI-EXPANDED, SSCI, A&HCI, CPCI-S, CPCI-SSH, BKCI-S, BKCI-SSH, ESCI, CCR-EXPANDED, IC Timespan=All years

# 9

35,680

TS=(Montreal cognitive assessment OR MOCA OR Mini-Mental Status Examination OR MMSE OR Saint Louis University Mental Status OR SLUMS OR "AD8" OR Quick Dementia

Rating System OR QDR)

Indexes=SCI-EXPANDED, SSCI, A&HCI, CPCI-S, CPCI-SSH, BKCI-S, BKCI-SSH, ESCI, CCR-EXPANDED, IC Timespan=All years

# 8

303,271

TS=((mental\* or cognitive\* or cognition\* or orientation\* or agitation\* or memory\* or concentration\* or dementia\* or mini-cog\* or mini-mental\* or neurocognit\*) NEAR/3

(assess\* or test\* or eval\* or screen\* or question\* or exam\* or scale\* or calculator\*))

Indexes=SCI-EXPANDED, SSCI, A&HCI, CPCI-S, CPCI-SSH, BKCI-S, BKCI-SSH, ESCI, CCR-EXPANDED, IC Timespan=All years

# 7

490,311

#6 OR #5

Indexes=SCI-EXPANDED, SSCI, A&HCI, CPCI-S, CPCI-SSH, BKCI-S, BKCI-SSH, ESCI, CCR-EXPANDED, IC Timespan=All years

# 6

194,671

TS=((cognit\* or neurocognit\* or frontotemporal) NEAR/2 (disorder\* or defect\* or deficit\* or decline\* or deteriorat\* or disabilit\* or dysfunction\* or disfunction\* or impaired or impairment\* or interference\*))

Indexes=SCI-EXPANDED, SSCI, A&HCI, CPCI-S, CPCI-SSH, BKCI-S, BKCI-SSH, ESCI, CCR-EXPANDED, IC Timespan=All years

# 5

381,017

TS=(dementia\* or amentia\* or demention\* or CADASIL or Alzheimer\* or Creutzfeldt-Jakob or

Huntington\* or Lewy-Bod\*)

Indexes=SCI-EXPANDED, SSCI, A&HCI, CPCI-S, CPCI-SSH, BKCI-S, BKCI-SSH, ESCI, CCR-EXPANDED, IC Timespan=All years

# 4

206,166

#3 OR #2 OR #1

Indexes=SCI-EXPANDED, SSCI, A&HCI, CPCI-S, CPCI-SSH, BKCI-S, BKCI-SSH, ESCI, CCR-EXPANDED, IC Timespan=All years

# 3

183,526

TS=((Emergency or emergencies) NEAR/2 (admit\* or admission\* or care\* or treatment\* or service\* or dispatch\* or department\* or unit\* or ward\* or room\* or center\* or centre\* or system\* or personnel\* or physician\* or provider\* or doctor\* or nurs\* or patient\*))

Indexes=SCI-EXPANDED, SSCI, A&HCI, CPCI-S, CPCI-SSH, BKCI-S, BKCI-SSH, ESCI, CCR-EXPANDED, IC Timespan=All years

# 2

25,620

TS=(trauma NEAR/1 (care\* or support\* or center\* or centre\* or department\* or unit\* or room\* or ward\* or service\*))

Indexes=SCI-EXPANDED, SSCI, A&HCI, CPCI-S, CPCI-SSH, BKCI-S, BKCI-SSH, ESCI, CCR-EXPANDED, IC Timespan=All years

# 1

14,077

TS=((ED or EMS or ER) NEAR/1 (care\* or visit\* or stay\* or admit\* or admission\* or evaluation\* or assess\*))

Indexes=SCI-EXPANDED, SSCI, A&HCI, CPCI-S, CPCI-SSH, BKCI-S, BKCI-SSH, ESCI, CCR-EXPANDED, IC Timespan=All years

PubMed CENTRAL (PUuMed, Medline NOT Medline)

PICO 1, 127 results

(("emergency care"[Title/Abstract] OR "emergency treatment"[Title/Abstract] OR "emergency service"[Title/Abstract] OR "emergency dispatch"[Title/Abstract] OR "emergency department"[Title/Abstract] OR "emergency unit"[Title/Abstract] OR "emergency ward"[Title/Abstract] OR "emergency room"[Title/Abstract] OR "emergency center"[Title/Abstract] OR "emergency centre"[Title/Abstract] OR "emergency system"[Title/Abstract] OR "emergency-personnel"[Title/Abstract] OR "emergency physician"[Title/Abstract] OR "emergency provider"[Title/Abstract] OR "emergency doctor"[Title/Abstract] OR "emergency nurs"[Title/Abstract] OR "emergency admission"[Title/Abstract] OR "emergency patient"[Title/Abstract] OR "emergency admit"[Title/Abstract] OR "trauma care"[Title/Abstract] OR "trauma treatment"[Title/Abstract] OR "trauma service"[Title/Abstract] OR "trauma dispatch"[Title/Abstract] OR "trauma department"[Title/Abstract] OR "trauma unit"[Title/Abstract] OR "trauma ward"[Title/Abstract] OR "trauma room"[Title/Abstract] OR "trauma center"[Title/Abstract] OR "trauma centre"[Title/Abstract] OR "trauma system"[Title/Abstract] OR "trauma service"[Title/Abstract] OR "trauma-personnel"[Title/Abstract] OR "trauma physician"[Title/Abstract] OR "trauma provider"[Title/Abstract] OR "trauma doctor"[Title/Abstract] OR "trauma nurs"[Title/Abstract] OR "trauma patient"[Title/Abstract] OR "emergency-center"[Title/Abstract] OR "unscheduled-acute-care"[Title/Abstract] OR "ED-care"[Title/Abstract] OR "ed visit"[Title/Abstract] OR "ed stay"[Title/Abstract] OR "ed admit"[Title/Abstract] OR "ed admission"[Title/Abstract] OR "ed evaluation"[Title/Abstract] OR "ed assess"[Title/Abstract] OR "ER-care"[Title/Abstract] OR "er visit"[Title/Abstract] OR "er stay"[Title/Abstract] OR "er admission"[Title/Abstract] OR "er evaluation"[Title/Abstract] OR "er assess"[Title/Abstract] OR "EMS-care"[Title/Abstract] OR "ems evaluation"[Title/Abstract] OR "ems assess"[Title/Abstract]) AND ("dementia"[Title/Abstract] OR "amentia"[Title/Abstract] OR "demention"[Title/Abstract] OR "CADASIL"[Title/Abstract] OR "alzheimer"[Title/Abstract] OR "Creutzfeldt-Jakob"[Title/Abstract] OR "huntington"[Title/Abstract] OR "lewy bod"[Title/Abstract] OR "cognitive disorder"[Title/Abstract] OR "cognitive defect"[Title/Abstract] OR "cognitive deficit"[Title/Abstract] OR "cognitive decline"[Title/Abstract] OR "cognitive deteriorat"[Title/Abstract] OR "cognitive disabilit"[Title/Abstract] OR "cognitive dysfunction"[Title/Abstract] OR "cognitive disfunction"[Title/Abstract] OR "cognitive-impaired"[Title/Abstract] OR "cognitive impairment"[Title/Abstract] OR "cognitive interference"[Title/Abstract] OR "neurocognitive disorder"[Title/Abstract] OR "neurocognitive defect"[Title/Abstract] OR "neurocognitive deficit"[Title/Abstract] OR "neurocognitive decline"[Title/Abstract] OR "neurocognitive deteriorat"[Title/Abstract] OR "neurocognitive disabilit"[Title/Abstract] OR "neurocognitive dysfunction"[Title/Abstract] OR "neurocognitive impairment"[Title/Abstract] OR "frontotemporal disorder"[Title/Abstract] OR "frontotemporal defect"[Title/Abstract] OR "frontotemporal dysfunction"[Title/Abstract] OR "frontotemporal impairment"[Title/Abstract] OR "impaired cognit"[Title/Abstract] OR "impaired neurocogn"[Title/Abstract]) AND (((("mental"[Title/Abstract] OR "cognition"[Title/Abstract] OR "orientation"[Title/Abstract] OR "agitation"[Title/Abstract] OR "memory"[Title/Abstract] OR "concentration"[Title/Abstract] OR "dementia"[Title/Abstract] OR "mini cog"[Title/Abstract] OR "mini mental"[Title/Abstract] OR "neurocognit"[Title/Abstract]) AND ("assess"[Title/Abstract] OR "test"[Title/Abstract] OR "eval"[Title/Abstract] OR "screen"[Title/Abstract]

Abstract] OR "question\*[Title/Abstract] OR "exam\*[Title/Abstract] OR "scale\*[Title/Abstract] OR "calculator\*[Title/Abstract])) OR ("montreal cognitive assessment"[Title/Abstract] OR "MOCA"[Title/Abstract] OR "mini mental status examination"[Title/Abstract] OR "MMSE"[Title/Abstract] OR "saint louis university mental status"[Title/Abstract] OR "SLUMS"[Title/Abstract] OR "AD8"[Title/Abstract] OR "quick dementia rating system"[Title/Abstract] OR "QDR"[Title/Abstract])) AND ("accurac\*[Title/Abstract] OR "accurate\*[Title/Abstract] OR "reproducib\*[Title/Abstract] OR "specificit\*[Title/Abstract] OR "sensitivity\*[Title/Abstract] OR "likelihood\*[Title/Abstract] OR "like lihood\*[Title/Abstract] OR "statistic\*[Title/Abstract] OR "analysis\*[Title/Abstract] OR "analyses\*[Title/Abstract] OR "analyze\*[Title/Abstract] OR "mathematic\*[Title/Abstract] OR "calculation\*[Title/Abstract] OR "ratio\*[Title/Abstract] OR "probabilit\*[Title/Abstract] OR "estimat\*[Title/Abstract] OR "false positive\*[Title/Abstract] OR "false negative\*[Title/Abstract] OR "true positive\*[Title/Abstract] OR "true negative\*[Title/Abstract] OR "concept\*[Title/Abstract] OR "theoretical\*[Title/Abstract])) NOT (("emergency care\*[Title/Abstract] OR "emergency treatment\*[Title/Abstract] OR "emergency service\*[Title/Abstract] OR "emergency dispatch\*[Title/Abstract] OR "emergency department\*[Title/Abstract] OR "emergency unit\*[Title/Abstract] OR "emergency ward\*[Title/Abstract] OR "emergency room\*[Title/Abstract] OR "emergency center\*[Title/Abstract] OR "emergency centre\*[Title/Abstract] OR "emergency system\*[Title/Abstract] OR "emergency-personnel"[Title/Abstract] OR "emergency physician\*[Title/Abstract] OR "emergency provider\*[Title/Abstract] OR "emergency doctor\*[Title/Abstract] OR "emergency nurs\*[Title/Abstract] OR "emergency patient\*[Title/Abstract] OR "emergency admission\*[Title/Abstract] OR "emergency admit\*[Title/Abstract] OR "trauma care\*[Title/Abstract] OR "trauma treatment\*[Title/Abstract] OR "trauma service\*[Title/Abstract] OR "trauma dispatch\*[Title/Abstract] OR "trauma department\*[Title/Abstract] OR "trauma unit\*[Title/Abstract] OR "trauma ward\*[Title/Abstract] OR "trauma room\*[Title/Abstract] OR "trauma center\*[Title/Abstract] OR "trauma centre\*[Title/Abstract] OR "trauma system\*[Title/Abstract] OR "trauma service\*[Title/Abstract] OR "trauma-personnel"[Title/Abstract] OR "trauma physician\*[Title/Abstract] OR "trauma provider\*[Title/Abstract] OR "trauma doctor\*[Title/Abstract] OR "trauma nurs\*[Title/Abstract] OR "trauma patient\*[Title/Abstract] OR "emergicenter"[Title/Abstract] OR "unscheduled-acute-care"[Title/Abstract] OR "ED-care"[Title/Abstract] OR "ed visit\*[Title/Abstract] OR "ed stay\*[Title/Abstract] OR "ed admit\*[Title/Abstract] OR "ed admission\*[Title/Abstract] OR "ed evaluation\*[Title/Abstract] OR "ed assess\*[Title/Abstract] OR "ER-care"[Title/Abstract] OR "er visit\*[Title/Abstract] OR "er stay\*[Title/Abstract] OR "er admission\*[Title/Abstract] OR "er evaluation\*[Title/Abstract] OR "er assess\*[Title/Abstract] OR "EMS-care"[Title/Abstract] OR "ems evaluation\*[Title/Abstract] OR "ems assess\*[Title/Abstract]) AND ("dementia\*[Title/Abstract] OR "amentia\*[Title/Abstract] OR "demention\*[Title/Abstract] OR "CADASIL"[Title/Abstract] OR "alzheimer\*[Title/Abstract] OR "Creutzfeldt-Jakob"[Title/Abstract] OR "huntington\*[Title/Abstract] OR "lewy bod\*[Title/Abstract] OR "cognitive disorder\*[Title/Abstract] OR "cognitive defect\*[Title/Abstract] OR "cognitive deficit\*[Title/Abstract] OR "cognitive decline\*[Title/Abstract] OR "cognitive deteriorat\*[Title/Abstract] OR "cognitive disabilit\*[Title/Abstract] OR "cognitive dysfunction\*[Title/Abstract] OR "cognitive impaired\*[Title/Abstract] OR "cognitive impairment\*[Title/Abstract] OR "cognitive interference\*[Title/Abstract] OR "neurocognitive disorder\*[Title/Abstract] OR "neurocognitive defect\*[Title/Abstract] OR "neurocognitive defici\*[Title/Abstract] OR "neurocognitive decline\*[Title/Abstract] OR "neurocognitive deteriorat\*[Title/Abstract] OR "neurocognitive disabilit\*[Title/Abstract] OR "neurocognitive dysfunction\*[Title/Abstract] OR "neurocognitive impairment\*[Title/

Abstract] OR "frontotemporal disorder\*[Title/Abstract] OR "frontotemporal defect\*[Title/Abstract] OR "frontotemporal dysfunction\*[Title/Abstract] OR "frontotemporal impairment\*[Title/Abstract] OR "impaired cognit\*[Title/Abstract] OR "impaired neurocogn\*[Title/Abstract]) AND (((("mental\*[Title/Abstract] OR "cognitive\*[Title/Abstract] OR "cognition\*[Title/Abstract] OR "orientation\*[Title/Abstract] OR "agitation\*[Title/Abstract] OR "memory\*[Title/Abstract] OR "concentration\*[Title/Abstract] OR "dementia\*[Title/Abstract] OR "mini cog\*[Title/Abstract] OR "mini mental\*[Title/Abstract] OR "neurocognit\*[Title/Abstract]) AND ("assess\*[Title/Abstract] OR "test\*[Title/Abstract] OR "eval\*[Title/Abstract] OR "screen\*[Title/Abstract] OR "question\*[Title/Abstract] OR "exam\*[Title/Abstract] OR "scale\*[Title/Abstract] OR "calculator\*[Title/Abstract])) OR ("montreal cognitive assessment"[Title/Abstract] OR "MOCA"[Title/Abstract] OR "mini mental status examination"[Title/Abstract] OR "MMSE"[Title/Abstract] OR "saint louis university mental status"[Title/Abstract] OR "SLUMS"[Title/Abstract] OR "AD8"[Title/Abstract] OR "quick dementia rating system"[Title/Abstract] OR "QDR"[Title/Abstract])) AND ("accurac\*[Title/Abstract] OR "accurate\*[Title/Abstract] OR "reproducib\*[Title/Abstract] OR "specificit\*[Title/Abstract] OR "sensitivity\*[Title/Abstract] OR "likelihood\*[Title/Abstract] OR "like lihood\*[Title/Abstract] OR "statistic\*[Title/Abstract] OR "analysis\*[Title/Abstract] OR "analyses\*[Title/Abstract] OR "analyze\*[Title/Abstract] OR "mathematic\*[Title/Abstract] OR "calculation\*[Title/Abstract] OR "ratio\*[Title/Abstract] OR "probabilit\*[Title/Abstract] OR "estimat\*[Title/Abstract] OR "false positive\*[Title/Abstract] OR "false negative\*[Title/Abstract] OR "true positive\*[Title/Abstract] OR "true negative\*[Title/Abstract] OR "concept\*[Title/Abstract] OR "theoretical\*[Title/Abstract]) AND "medline"[Filter])

PubMed CENTRAL (PUuMed, Medline NOT Medline)

PICO 2, 182 results

((((emergency-care\*[tiab] OR emergency-treatment\*[tiab] OR emergency-service\*[tiab] OR emergency-dispatch\*[tiab] OR emergency-department\*[tiab] OR emergency-unit\*[tiab] OR emergency-ward\*[tiab] OR emergency-room\*[tiab] OR emergency-center\*[tiab] OR emergency-centre\*[tiab] OR emergency-system\*[tiab] OR emergency-personnel[tiab] OR emergency-physician\*[tiab] OR emergency-provider\*[tiab] OR emergency-doctor\*[tiab] OR emergency-nurs\*[tiab] OR emergency-patient\*[tiab] OR emergency-admission\*[tiab] OR emergency-admit\*[tiab] OR trauma-care\*[tiab] OR trauma-treatment\*[tiab] OR trauma-service\*[tiab] OR trauma-dispatch\*[tiab] OR trauma-department\*[tiab] OR trauma-unit\*[tiab] OR trauma-ward\*[tiab] OR trauma-room\*[tiab] OR trauma-center\*[tiab] OR trauma-centre\*[tiab] OR trauma-system\*[tiab] OR trauma-service\*[tiab] OR trauma-personnel[tiab] OR trauma-physician\*[tiab] OR trauma-provider\*[tiab] OR trauma-doctor\*[tiab] OR trauma-nurs\*[tiab] OR trauma-patient\*[tiab] OR emergicenter[tiab] OR unscheduled-acute-care[tiab] OR ED-care[tiab] OR ED-visit\*[tiab] OR ED-stay\*[tiab] OR ED-admit\*[tiab] OR ED-admission\*[tiab] OR ED-evaluation\*[tiab] OR ED-assess\*[tiab] OR ER-care[tiab] OR ER-visit\*[tiab] OR ER-stay\*[tiab] OR ER-admission\*[tiab] OR ER-evaluation\*[tiab] OR ER-assess\*[tiab] OR EMS-care[tiab] OR EMS-evaluation\*[tiab] OR EMS-assess\*[tiab]) AND (dementia\*[tiab] OR amentia\*[tiab] OR demention\*[tiab] OR CADASIL[tiab] OR Alzheimer\*[tiab] OR Creutzfeldt-Jakob[tiab] OR Huntington\*[tiab] OR Lewy-Bod\*[tiab] OR cognitive-disorder\*[tiab] OR cognitive-defect\*[tiab] OR cognitive-deficit\*[tiab] OR cognitive-decline\*[tiab] OR cognitive-deteriorat\*[tiab] OR cognitive-disabilit\*[tiab] OR cognitive-dysfunction\*[tiab] OR cognitive-impaired[tiab] OR cognitive-impairment\*[tiab] OR cognitive-interference\*[tiab] OR neurocognitive-disorder\*[tiab] OR neurocognitive-defect\*[tiab] OR neurocognitive-deficit\*[tiab] OR neurocognitive-decline\*[tiab] OR neurocognitive-deteriorat\*[tiab] OR neurocognitive-disabilit\*[tiab] OR neurocognitive-dysfunction\*[tiab] OR neurocognitive-

impairment\*[tiab] OR frontotemporal-disorder\*[tiab] OR frontotemporal-defect\*[tiab] OR frontotemporal-dysfunction\*[tiab] OR frontotemporal-impairment\*[tiab] OR impaired-cognit\*[tiab] OR impaired-neurocogn\*[tiab])) AND (((mental\*[Title/Abstract] OR cognitive\*[Title/Abstract] OR cognition\*[Title/Abstract] OR orientation\*[Title/Abstract] OR agitation\*[Title/Abstract] OR memory\*[Title/Abstract] OR concentration\*[Title/Abstract] OR dementia\*[Title/Abstract] OR mini-cog\*[Title/Abstract] OR mini-mental\*[Title/Abstract] OR neurocognit\*[Title/Abstract]) AND (assess\*[Title/Abstract] OR test\*[Title/Abstract] OR eval\*[Title/Abstract] OR screen\*[Title/Abstract] OR question\*[Title/Abstract] OR exam\*[Title/Abstract] OR scale\*[Title/Abstract] OR calculator\*[Title/Abstract])) OR (Montreal cognitive assessment[Title/Abstract] OR MOCA[Title/Abstract] OR Mini-Mental Status Examination[Title/Abstract] OR MMSE[Title/Abstract] OR Saint Louis University Mental Status[Title/Abstract] OR SLUMS[Title/Abstract] OR "AD8"[Title/Abstract] OR Quick Dementia Rating System [Title/Abstract] OR QDR[Title/Abstract])) AND (pragmati\*[Title/Abstract] OR practical\*[Title/Abstract] OR feasibilit\*[Title/Abstract] OR usabilit\*[Title/Abstract] OR acceptabilit\*[Title/Abstract] OR acceptance\*[Title/Abstract] OR ease-of-use[Title/Abstract] OR organization\*[Title/Abstract] OR organisation\*[Title/Abstract] OR administration\*[Title/Abstract] OR method\*[Title/Abstract] OR standard\*[Title/Abstract] OR instrument\*[Title/Abstract] OR tool\*[Title/Abstract] OR education\*[Title/Abstract] OR training\*[Title/Abstract] OR learn\*[Title/Abstract] OR simulation\*[Title/Abstract] OR time\*[Title/Abstract] OR timing\*[Title/Abstract] OR automated\*[Title/Abstract] OR automation\*[Title/Abstract])) NOT (((emergency-care\*[tiab] OR emergency-treatment\*[tiab] OR emergency-service\*[tiab] OR emergency-dispatch\*[tiab] OR emergency-department\*[tiab] OR emergency-unit\*[tiab] OR emergency-ward\*[tiab] OR emergency-room\*[tiab] OR emergency-center\*[tiab] OR emergency-centre\*[tiab] OR emergency-system\*[tiab] OR emergency-personnel[tiab] OR emergency-physician\*[tiab] OR emergency-provider\*[tiab] OR emergency-doctor\*[tiab] OR emergency-nurs\*[tiab] OR emergency-patient\*[tiab] OR emergency-admission\*[tiab] OR emergency-admit\*[tiab] OR trauma-care\*[tiab] OR trauma-treatment\*[tiab] OR trauma-service\*[tiab] OR trauma-dispatch\*[tiab] OR trauma-department\*[tiab] OR trauma-unit\*[tiab] OR trauma-ward\*[tiab] OR trauma-room\*[tiab] OR trauma-center\*[tiab] OR trauma-centre\*[tiab] OR trauma-system\*[tiab] OR trauma-service\*[tiab] OR trauma-personnel[tiab] OR trauma-physician\*[tiab] OR trauma-provider\*[tiab] OR trauma-doctor\*[tiab] OR trauma-nurs\*[tiab] OR trauma-patient\*[tiab] OR emergicenter[tiab] OR unscheduled-acute-care[tiab] OR ED-care[tiab] OR ED-visit\*[tiab] OR ED-stay\*[tiab] OR ED-admit\*[tiab] OR ED-admission\*[tiab] OR ED-evaluation\*[tiab] OR ED-assess\*[tiab] OR ER-care[tiab] OR ER-visit\*[tiab] OR ER-stay\*[tiab] OR ER-admission\*[tiab] OR ER-evaluation\*[tiab] OR ER-assess\*[tiab] OR EMS-care[tiab] OR EMS-evaluation\*[tiab] OR EMS-assess\*[tiab]) AND (dementia\*[tiab] OR amentia\*[tiab] OR Creutzfeldt-Jakob[tiab] OR Huntington\*[tiab] OR Lewy-Bod\*[tiab] OR cognitive-disorder\*[tiab] OR cognitive-defect\*[tiab] OR cognitive-deficit\*[tiab] OR cognitive-decline\*[tiab] OR cognitive-deteriorat\*[tiab] OR cognitive-disabilit\*[tiab] OR cognitive-dysfunction\*[tiab] OR cognitive-disfunction\*[tiab] OR cognitive-impaired[tiab] OR cognitive-impairment\*[tiab] OR cognitive-interference\*[tiab] OR neurocognitive-disorder\*[tiab] OR neurocognitive-defect\*[tiab] OR neurocognitive-deficit\*[tiab] OR neurocognitive-decline\*[tiab] OR neurocognitive-deteriorat\*[tiab] OR neurocognitive-disabilit\*[tiab] OR neurocognitive-dysfunction\*[tiab] OR neurocognitive-impairment\*[tiab] OR frontotemporal-disorder\*[tiab] OR frontotemporal-defect\*[tiab] OR frontotemporal-dysfunction\*[tiab] OR frontotemporal-impairment\*[tiab] OR impaired-cognit\*[tiab] OR impaired-neurocogn\*[tiab])) AND (((mental\*[Title/Abstract] OR cognitive\*[Title/Abstract] OR cognition\*[Title/Abstract] OR orientation\*[Title/Abstract] OR agitation\*[Title/Abstract] OR memory\*[Title/Abstract] OR

concentration\*[Title/Abstract] OR dementia\*[Title/Abstract] OR mini-cog\*[Title/Abstract] OR mini-mental\*[Title/Abstract] OR neurocognit\*[Title/Abstract]) AND (assess\*[Title/Abstract] OR test\*[Title/Abstract] OR eval\*[Title/Abstract] OR screen\*[Title/Abstract] OR question\*[Title/Abstract] OR exam\*[Title/Abstract] OR scale\*[Title/Abstract] OR calculator\*[Title/Abstract])) OR (Montreal cognitive assessment[Title/Abstract] OR MOCA[Title/Abstract] OR Mini-Mental Status Examination[Title/Abstract] OR MMSE[Title/Abstract] OR Saint Louis University Mental Status[Title/Abstract] OR SLUMS[Title/Abstract] OR "AD8"[Title/Abstract] OR Quick Dementia Rating System[Title/Abstract] OR QDR[Title/Abstract])) AND (pragmati\*[Title/Abstract] OR practical\*[Title/Abstract] OR feasibilit\*[Title/Abstract] OR usabilit\*[Title/Abstract] OR acceptabilit\*[Title/Abstract] OR acceptance\*[Title/Abstract] OR ease-of-use[Title/Abstract] OR organization\*[Title/Abstract] OR organisation\*[Title/Abstract] OR administration\*[Title/Abstract] OR method\*[Title/Abstract] OR standard\*[Title/Abstract] OR instrument\*[Title/Abstract] OR tool\*[Title/Abstract] OR education\*[Title/Abstract] OR training\*[Title/Abstract] OR learn\*[Title/Abstract] OR simulation\*[Title/Abstract] OR time\*[Title/Abstract] OR timing\*[Title/Abstract] OR automated\*[Title/Abstract] OR automation\*[Title/Abstract]) AND (medline[Filter]))

Cochrane CENTRAL (trials)

ID Search Hits

#1 (emergicenter\* or Triage\* or unscheduled-acute-care):ti,ab,kw 1755

#2 ((ED or EMS or ER) near/1 (care\* OR visit\* or stay\* or admit\* or admission\* or evaluation\* OR assess\*)):ti,ab,kw 1914

#3 ((trauma) near/1 (care\* or support\* or center\* or centre\* or department\* or unit\* or room\* or ward\* or service\*)):ti,ab,kw 1400

#4 ((Emergency or emergencies) near/2 (admit\* or admission\* or care\* or treatment\* or service\* or dispatch\* or department\* or unit\* or ward\* or room\* or center\* or centre\* or system\* or personnel or physician\* or provider\* or doctor\* or nurs\* or patient\*)):ti,ab,kw 19318

#5 #1 OR #2 OR #3 OR #4 21387

#6 (dementia\* or amentia\* or dementia\* or CADASIL or Alzheimer\* or Creutzfeldt-Jakob or Huntington\* or Lewy-Bod\*):ti,ab,kw 20470

#7 ((cognit\* or neurocognit\* or frontotemporal) near/2 (disorder\* or defect\* or deficit\* or decline\* or deteriorat\* or disabilit\* or dysfunction\* or disfunction\* or impaired\* or impairment\* or interference\*)):ti,ab,kw 20493

#8 #6 OR #7 35214

#9 (mental\* or cognitive\* or cognition\* or orientation\* or agitation\* or memory\* or concentration\* or dementia\* or mini-cog\* or mini-mental\* or neurocognit\*) NEAR/3

(assess\* or test\* or eval\* or screen\* or question\* or exam\* or scale\* or calculator\*):ti,ab,kw 35794

#10 (Montreal cognitive assessment OR MOCA OR Mini-Mental Status Examination OR MMSE OR Saint Louis University Mental Status OR SLUMS OR AD8 OR Quick Dementia Rating System OR QDR):ti,ab,kw 6749

#11 #9 OR #10 37101

#12 #5 AND #8 AND #11 106

#13 (accurac\* or accurate\* or reproducib\* or specificit\* or sensitivity\* or likelihood\* or like-lihood\* or statistic\* or analysis\* or analyses\* or analyze\* or mathematic\* or calculation\* or ratio\* or probabilit\* or estimat\* or false-positive\* or false-negative\* or true-positive\* or true-negative\* or concept\* or theoretical\*):ti,ab,kw 752666

#14 #12 AND #13 76

#15 (pragmati\* or practical\* or feasibilit\* or usabilit\* or acceptabilit\* or acceptance\* or ease-of-use or organization\* or organisation\* or administration\* or method\* or standard\* or instrument\* or tool\* or education\* or training\* or learn\* or simulation\* or time\* or timing\* or automated\* or automation\*):ti,ab,kw 1215948

- #16 #12 AND #15 101
- #17 MeSH descriptor: [Infant] explode all trees 32413
- #18 MeSH descriptor: [Child] explode all trees 56688
- #19 MeSH descriptor: [Adolescent] explode all trees 104818
- #20 #17 or #18 or #19 149861
- #21 MeSH descriptor: [Adult] explode all trees 467867
- #22 #20 NOT #21 58997
- #23 #14 NOT #22 in Trials 75
- #24 #16 NOT #22 in Trials 100
- CINAHL Complete
- S1 MH "Emergency Medical Services+" Expanders - Apply equivalent subjects
- Search modes - Boolean/Phrase Interface - EBSCOhost Research Databases
- Search Screen - Advanced Search
- Database - CINAHL Complete 107,911
- S2 MH "Emergency Medicine" Expanders - Apply equivalent subjects
- Search modes - Boolean/Phrase Interface - EBSCOhost Research Databases
- Search Screen - Advanced Search
- Database - CINAHL Complete 12,809
- S3 MH "Physicians, Emergency" Expanders - Apply equivalent subjects
- Search modes - Boolean/Phrase Interface - EBSCOhost Research Databases
- Search Screen - Advanced Search
- Database - CINAHL Complete 4,445
- S4 MH "Emergency Nurse Practitioners" Expanders - Apply equivalent subjects
- Search modes - Boolean/Phrase Interface - EBSCOhost Research Databases
- Search Screen - Advanced Search
- Database - CINAHL Complete 662
- S5 MH "Emergency Nursing+" Expanders - Apply equivalent subjects
- Search modes - Boolean/Phrase Interface - EBSCOhost Research Databases
- Search Screen - Advanced Search
- Database - CINAHL Complete 15,518
- S6 MH "Emergency Patients" Expanders - Apply equivalent subjects
- Search modes - Boolean/Phrase Interface - EBSCOhost Research Databases
- Search Screen - Advanced Search
- Database - CINAHL Complete 8,329
- S7 TI (emergicenter\* or Triage\* or unscheduled-acute-care) OR AB (emergicenter\* or Triage\* or unscheduled-acute-care) Expanders - Apply equivalent subjects
- Search modes - Boolean/Phrase Interface - EBSCOhost Research Databases
- Search Screen - Advanced Search
- Database - CINAHL Complete 11,300
- S8 TI (("ED" or "EMS" or "ER") N1 (care\* or visit\* or stay\* or admit\* or admission\* or evaluation\* or assess\*)) OR AB (("ED" or "EMS" or "ER") N1 (care\* or visit\* or stay\* or admit\* or admission\* or evaluation\* or assess\*)) Expanders - Apply equivalent subjects
- Search modes - Boolean/Phrase Interface - EBSCOhost Research Databases
- Search Screen - Advanced Search
- Database - CINAHL Complete 9,224
- S9 TI (trauma N1 (care\* or support\* or center\* or centre\* or department\* or unit\* or room\* or ward\* or service\*)) OR AB (trauma N1 (care\* or support\* or center\* or centre\* or department\* or unit\* or room\* or ward\* or service\*)) Expanders - Apply equivalent subjects
- Search modes - Boolean/Phrase Interface - EBSCOhost Research Databases
- Search Screen - Advanced Search
- Database - CINAHL Complete 14,368
- S10 TI ((Emergency or emergencies) N2 (admit\* or admission\* or care\* or treatment\* or service\* or dispatch\* or department\* or unit\* or ward\* or room\* or center\* or centre\* or system\* or personnel\* or physician\* or provider\* or doctor\* or nurs\* or patient\*)) OR AB ((Emergency or emergencies) N2 (admit\* or admission\* or care\* or treatment\* or service\* or dispatch\* or department\* or unit\* or ward\* or room\* or center\* or centre\* or system\* or personnel\* or physician\* or provider\* or doctor\* or nurs\* or patient\*)) Expanders - Apply equivalent subjects
- Search modes - Boolean/Phrase Interface - EBSCOhost Research Databases
- Search Screen - Advanced Search
- Database - CINAHL Complete 95,158
- S11 S1 OR S2 OR S3 OR S4 OR S5 OR S6 OR S7 OR S8 OR S9 OR S10 Expanders - Apply equivalent subjects
- Search modes - Boolean/Phrase Interface - EBSCOhost Research Databases
- Search Screen - Advanced Search
- Database - CINAHL Complete 185,675
- S12 (MH "Dementia+") Expanders - Apply equivalent subjects
- Search modes - Boolean/Phrase Interface - EBSCOhost Research Databases
- Search Screen - Advanced Search
- Database - CINAHL Complete 76,007
- S13 TI (dementia\* or amentia\* or demention\* or CADASIL or Alzheimer\* or Creutzfeldt-Jakob or Huntington\* or Lewy-Bod\*) OR AB (dementia\* or amentia\* or demention\* or CADASIL or Alzheimer\* or Creutzfeldt-Jakob or Huntington\* or Lewy-Bod\*) Expanders - Apply equivalent subjects
- Search modes - Boolean/Phrase Interface - EBSCOhost Research Databases
- Search Screen - Advanced Search
- Database - CINAHL Complete 81,565
- S14 (MH "Cognition Disorders") OR (MH "Mild Cognitive Impairment") Expanders - Apply equivalent subjects
- Search modes - Boolean/Phrase Interface - EBSCOhost Research Databases
- Search Screen - Advanced Search
- Database - CINAHL Complete 31,167
- S15 TI ((cognit\* or neurocognit\* or frontotemporal) N2 (disorder\* or defect\* or deficit\* or decline\* or deteriorat\* or disabilit\* or dysfunction\* or disfunction\* or impaired or impairment\* or interference\*)) OR AB ((cognit\* or neurocognit\* or frontotemporal) N2 (disorder\* or defect\* or deficit\* or decline\* or deteriorat\* or disabilit\* or dysfunction\* or disfunction\* or impaired or impairment\* or interference\*)) Expanders - Apply equivalent subjects
- Search modes - Boolean/Phrase Interface - EBSCOhost Research Databases
- Search Screen - Advanced Search
- Database - CINAHL Complete 48,748
- S16 S12 OR S13 OR S14 OR S15 Expanders - Apply equivalent subjects
- Search modes - Boolean/Phrase Interface - EBSCOhost Research Databases
- Search Screen - Advanced Search
- Database - CINAHL Complete 141,321
- S17 (MH "Clinical Assessment Tools") Expanders - Apply equivalent subjects
- Search modes - Boolean/Phrase Interface - EBSCOhost Research Databases
- Search Screen - Advanced Search

Database - CINAHL Complete 169,223  
 S18 (MH "Mental Status/EV") Expanders - Apply equivalent subjects  
 Search modes - Boolean/Phrase Interface - EBSCOhost Research Databases  
 Search Screen - Advanced Search  
 Database - CINAHL Complete 615  
 S19 (MH "Diagnostic Tests, Routine") Expanders - Apply equivalent subjects  
 Search modes - Boolean/Phrase Interface - EBSCOhost Research Databases  
 Search Screen - Advanced Search  
 Database - CINAHL Complete 4,591  
 S20 (MH "Geriatric Assessment+") Expanders - Apply equivalent subjects  
 Search modes - Boolean/Phrase Interface - EBSCOhost Research Databases  
 Search Screen - Advanced Search  
 Database - CINAHL Complete 17,266  
 S21 (MH "Neuropsychological Tests+") Expanders - Apply equivalent subjects  
 Search modes - Boolean/Phrase Interface - EBSCOhost Research Databases  
 Search Screen - Advanced Search  
 Database - CINAHL Complete 36,416  
 S22 TI ((mental\* or cognitive\* or cognition\* or orientation\* or agitation\* or memory\* or concentration\* or dementia\* or mini-cog\* or mini-mental\* or neurocognit\*) N3 (assess\* or test\* or eval\* or screen\* or question\* or exam\* or scale\* or calculator\*)) Expanders - Apply equivalent subjects  
 Search modes - Boolean/Phrase Interface - EBSCOhost Research Databases  
 Search Screen - Advanced Search  
 Database - CINAHL Complete 9,268  
 S23 AB ((mental\* or cognitive\* or cognition\* or orientation\* or agitation\* or memory\* or concentration\* or dementia\* or mini-cog\* or mini-mental\* or neurocognit\*) N3 (assess\* or test\* or eval\* or screen\* or question\* or exam\* or scale\* or calculator\*)) Expanders - Apply equivalent subjects  
 Search modes - Boolean/Phrase Interface - EBSCOhost Research Databases  
 Search Screen - Advanced Search  
 Database - CINAHL Complete 61,663  
 S24 TI (Montreal cognitive assessment OR MOCA OR Mini-Mental Status Examination OR MMSE OR Saint Louis University Mental Status OR SLUMS OR "AD8" OR Quick Dementia Rating System OR QDR) Expanders - Apply equivalent subjects  
 Search modes - Boolean/Phrase Interface - EBSCOhost Research Databases  
 Search Screen - Advanced Search  
 Database - CINAHL Complete 865  
 S25 AB (Montreal cognitive assessment OR MOCA OR Mini-Mental Status Examination OR MMSE OR Saint Louis University Mental Status OR SLUMS OR "AD8" OR Quick Dementia Rating System OR QDR) Expanders - Apply equivalent subjects  
 Search modes - Boolean/Phrase Interface - EBSCOhost Research Databases  
 Search Screen - Advanced Search  
 Database - CINAHL Complete 6,756  
 S26 S17 OR S18 OR S19 OR S20 OR S22 OR S23 OR S24 OR S25 Expanders - Apply equivalent subjects  
 Search modes - Boolean/Phrase Interface - EBSCOhost Research Databases  
 Search Screen - Advanced Search  
 Database - CINAHL Complete 247,110

S27 S11 AND S16 AND S26 Expanders - Apply equivalent subjects  
 Search modes - Boolean/Phrase Interface - EBSCOhost Research Databases  
 Search Screen - Advanced Search  
 Database - CINAHL Complete 440  
 S28 (MH "Reliability and Validity+") Expanders - Apply equivalent subjects  
 Search modes - Boolean/Phrase Interface - EBSCOhost Research Databases  
 Search Screen - Advanced Search  
 Database - CINAHL Complete 258,799  
 S29 TI (accurac\* or accurate\* or reproducib\* or specificit\* or sensitivity\* or likelihood\* or like-lihood\* or statistic\* or analysis\* or analyses\* or analyze\* or mathematic\* or calculation\* or ratio\* or probabilit\* or estimat\* or false-positive\* or false-negative\* or true-positive\* or true-negative\* or concept\* or theoretical\*) Expanders - Apply equivalent subjects  
 Search modes - Boolean/Phrase Interface - EBSCOhost Research Databases  
 Search Screen - Advanced Search  
 Database - CINAHL Complete 326,037  
 S30 AB (accurac\* or accurate\* or reproducib\* or specificit\* or sensitivity\* or likelihood\* or like-lihood\* or statistic\* or analysis\* or analyses\* or analyze\* or mathematic\* or calculation\* or ratio\* or probabilit\* or estimat\* or false-positive\* or false-negative\* or true-positive\* or true-negative\* or concept\* or theoretical\*) Expanders - Apply equivalent subjects  
 Search modes - Boolean/Phrase Interface - EBSCOhost Research Databases  
 Search Screen - Advanced Search  
 Database - CINAHL Complete 1,596,933  
 S31 S29 OR S30 Expanders - Apply equivalent subjects  
 Search modes - Boolean/Phrase Interface - EBSCOhost Research Databases  
 Search Screen - Advanced Search  
 Database - CINAHL Complete 1,735,631  
 S32 MH "Task Performance and Analysis+" OR (MH "Time Management") Expanders - Apply equivalent subjects  
 Search modes - Boolean/Phrase Interface - EBSCOhost Research Databases  
 Search Screen - Advanced Search  
 Database - CINAHL Complete 22,887  
 S33 (MH "Time+") Expanders - Apply equivalent subjects  
 Search modes - Boolean/Phrase Interface - EBSCOhost Research Databases  
 Search Screen - Advanced Search  
 Database - CINAHL Complete 197,095  
 S34 (MH "Education+") Expanders - Apply equivalent subjects  
 Search modes - Boolean/Phrase Interface - EBSCOhost Research Databases  
 Search Screen - Advanced Search  
 Database - CINAHL Complete 951,735  
 S35 TI ((pragmati\* or practical\* or feasibilit\* or usabilit\* or acceptabilit\* or acceptance\* or ease-of-use or organization\* or organisation\* or administration\* or method\* or standard\* or instrument\* or tool\* or education\* or training\* or learn\* or simulation\* or time\* or timing\* or automated\* or automation\*) Expanders - Apply equivalent subjects  
 Search modes - Boolean/Phrase Interface - EBSCOhost Research Databases  
 Search Screen - Advanced Search  
 Database - CINAHL Complete 578,579  
 S36 AB ((pragmati\* or practical\* or feasibilit\* or usabilit\* or acceptabilit\* or acceptance\* or ease-of-use or organization\* or organisation\* or administration\* or method\* or standard\* or instrument\*



or tool\* or education\* or training\* or learn\* or simulation\* or time\* or timing\* or automated\* or automation\*) Expanders - Apply equivalent subjects

Search modes - Boolean/Phrase Interface - EBSCOhost Research Databases

Search Screen - Advanced Search

Database - CINAHL Complete 2,116,284

S37 S32 OR S33 OR S34 OR S35 OR S36 Expanders - Apply equivalent subjects

Search modes - Boolean/Phrase Interface - EBSCOhost Research Databases

Search Screen - Advanced Search

Database - CINAHL Complete 2,991,525

S38 S27 AND S31 Expanders - Apply equivalent subjects

Search modes - Boolean/Phrase Interface - EBSCOhost Research Databases

Search Screen - Advanced Search

Database - CINAHL Complete 244

S39 NOT ((MH "Child+") or (MH "Adolescence")) NOT (MH "Adult+") Expanders - Apply equivalent subjects

Search modes - Boolean/Phrase Interface - EBSCOhost Research Databases

Search Screen - Advanced Search

Database - CINAHL Complete 623,765

S40 S38 NOT S39 Expanders - Apply equivalent subjects

Search modes - Boolean/Phrase Interface - EBSCOhost Research Databases

Search Screen - Advanced Search

Database - CINAHL Complete 239

S41 S27 AND S37 Expanders - Apply equivalent subjects

Search modes - Boolean/Phrase Interface - EBSCOhost Research Databases

Search Screen - Advanced Search

Database - CINAHL Complete 330

S42 NOT ((MH "Child+") or (MH "Adolescence")) NOT (MH "Adult+") Expanders - Apply equivalent subjects

Search modes - Boolean/Phrase Interface - EBSCOhost Research Databases

Search Screen - Advanced Search

Database - CINAHL Complete 623,765

S43 S41 NOT S42 Expanders - Apply equivalent subjects

Search modes - Boolean/Phrase Interface - EBSCOhost Research Databases

Search Screen - Advanced Search

Database - CINAHL Complete 323

DEDUPLICATION

#### PICO 1

Summary:

RIS data file: PICO 1\_GEAR2.txt (2160 references)

Total references considered: 2160

Sensitivity level: medium

Total references removed: 696

Remaining references: 1464

Duration: 27 seconds (Uploading: 19 seconds|Processing: 8 seconds)

Start time: March 25, 2021, 1651-0400 h

Code version: 1e70a5 (January 25, 2021)

#### PICO 2

Summary:

RIS data file: PICO 2\_GEAR2.txt (3259 references)

Total references considered: 3259

Sensitivity level: medium

Total references removed: 1086

Remaining references: 2173

Duration: 40 seconds (Uploading: 28 seconds|Processing: 12 seconds)

Start time: March 25, 2021, 1658-0400 h

Code version: 1e70a5 (January 25, 2021)

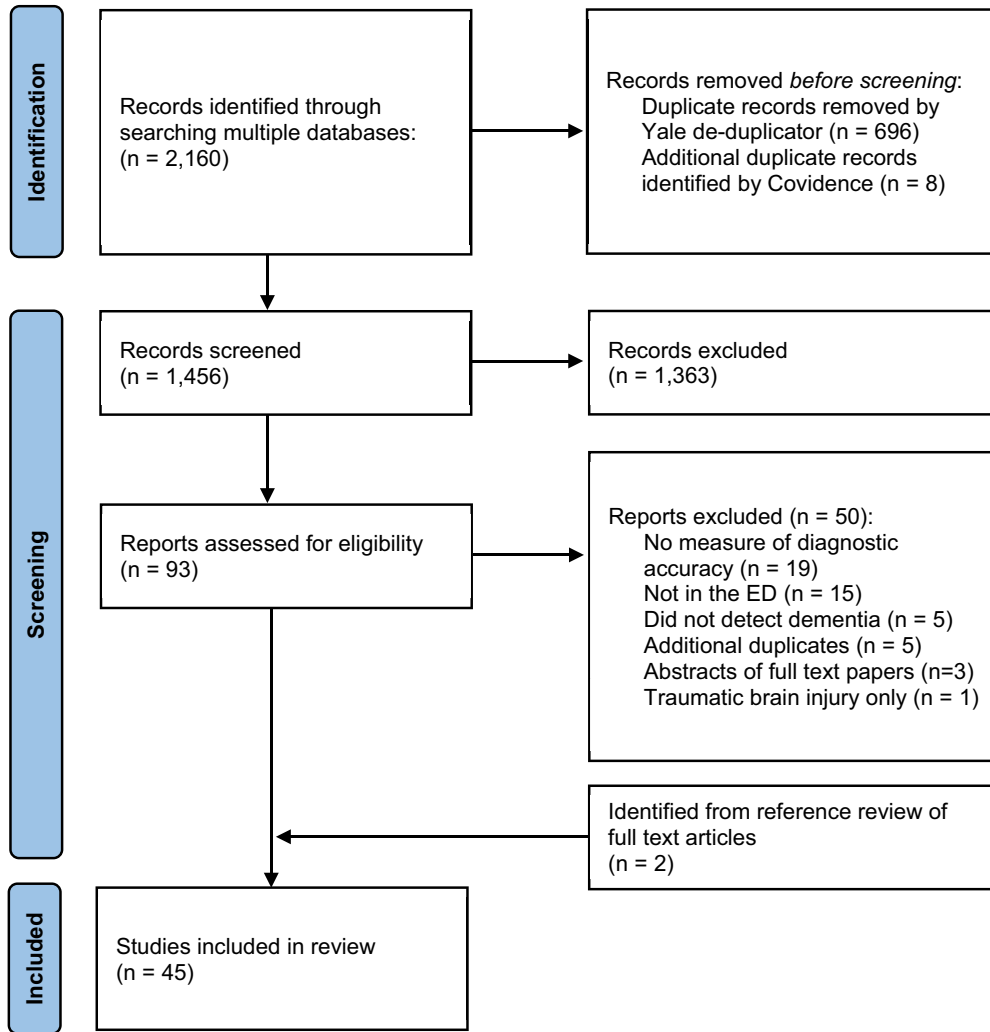

Supplementary Fig. 1. PRISMA-ScR flow diagram PICO 1.

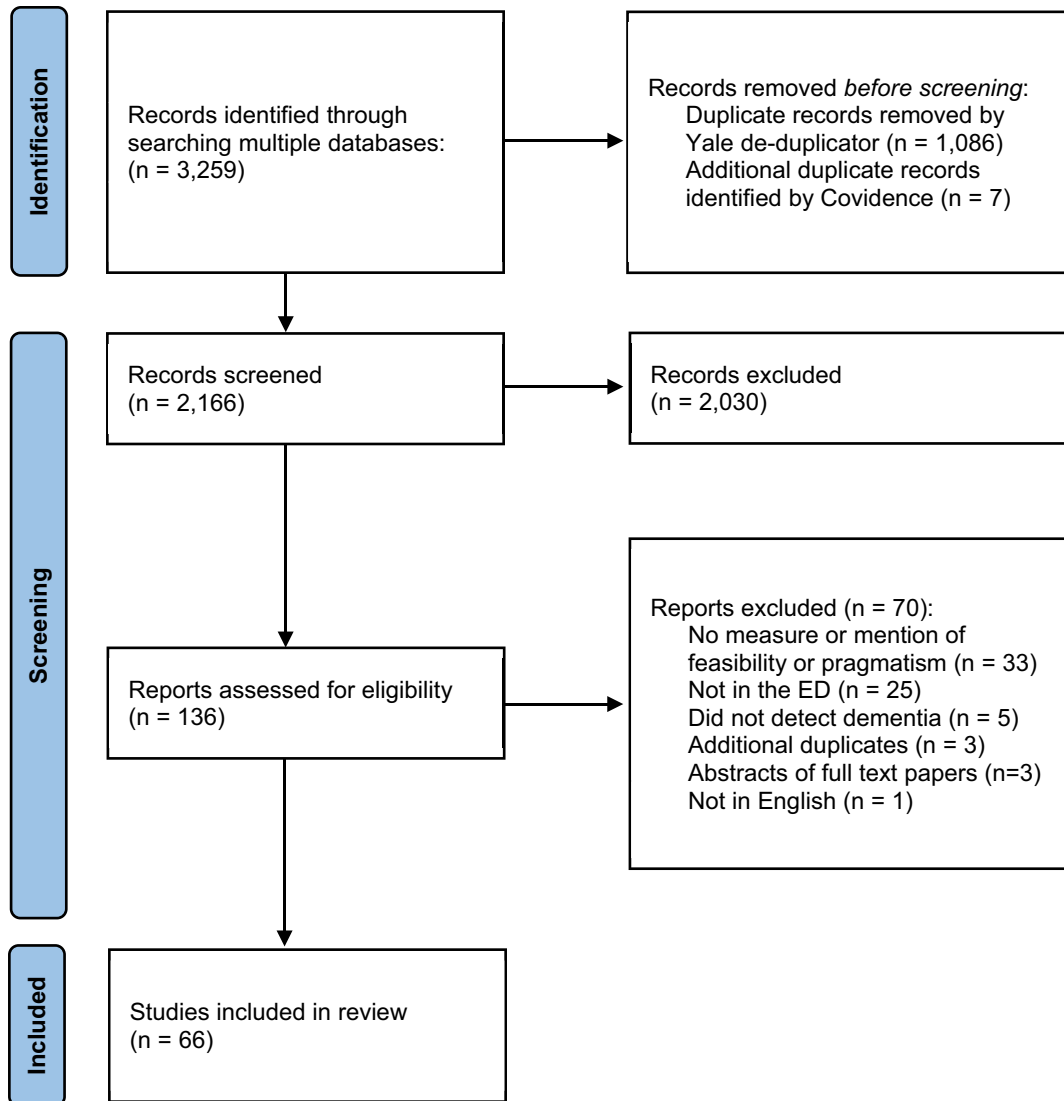

Supplementary Fig. 2. PRISMA-ScR flow diagram PICO 2.

**Supplementary Table 1**  
PICO 1 Abstraction Table

| Study, Location, Time Frame (* in PICO 1 & PICO 2)                                                                   | No. of Patients (median or Mean Age)                                         | Inclusion Criteria                                                                                                                                                                                   | Exclusion Criteria                                                                                                                                                                                                                                                                                                     | Study Design; Timing of Recruitment                                                                                                                                                                                                                                                                      | Intervention: Screening Instrument or Tool Studied                                                        | Gold Standard for Dementia or Cognitive Impairment | Measures of Accuracy, Reliability, Sensitivity, Specificity, Negative LR, Positive LR, Correlation Coefficients, etc                                                                                                                                                                                                                                                                                                                                                                                                                                                                                                                                                                      |
|----------------------------------------------------------------------------------------------------------------------|------------------------------------------------------------------------------|------------------------------------------------------------------------------------------------------------------------------------------------------------------------------------------------------|------------------------------------------------------------------------------------------------------------------------------------------------------------------------------------------------------------------------------------------------------------------------------------------------------------------------|----------------------------------------------------------------------------------------------------------------------------------------------------------------------------------------------------------------------------------------------------------------------------------------------------------|-----------------------------------------------------------------------------------------------------------|----------------------------------------------------|-------------------------------------------------------------------------------------------------------------------------------------------------------------------------------------------------------------------------------------------------------------------------------------------------------------------------------------------------------------------------------------------------------------------------------------------------------------------------------------------------------------------------------------------------------------------------------------------------------------------------------------------------------------------------------------------|
| Hirschman*, 2011, Hospital of the University of Pennsylvania, PA, USA; ED; September 2007 and May 2008               | N = 829; 65 y or older; mean age 75.7 ± 7.1 y (65–105)                       | Spoke English, were 65 y or older, lived within a 30-mile radius of the ED in the state of Pennsylvania, and lived independently (ie, not in a nursing home)                                         | End-stage disease with prognosis of 6 mo or less, cancer diagnosis with active treatment, known alcohol or drug abuse, history of neurologic disease (eg, cerebral vascular accident with residual effects, multiple sclerosis, etc), a previous medical history of dementia or delirium, or resided in a nursing home | A cross-sectional, observational study of older adults admitted to the ED of a large, urban, tertiary academic health center was conducted to identify rates of impairment among older adults; and identify relationships, if any, between ED environmental factors and presence of cognitive impairment | Six-Item Screen (SIS) and clock-drawing task (CLOX1)                                                      | N/A                                                | No measure of diagnostic accuracy but identified factors associated with positive cognitive screen tests: Patients were more likely to screen positive for cognitive impairment using the SIS if they were 85 y or older (RR 1.63, $P < .001$ ), Black (RR 1.85, $P < .001$ ), and male (RR 1.42, $P < .001$ ). Interestingly, only age was significantly associated with screening positive for cognitive impairment in the ED using the CLOX1 (75–84 y: RR 1.35, $P < .001$ ; $\geq 85$ y: RR 1.69, $P < .001$ )                                                                                                                                                                        |
| Carpenter*, 2008                                                                                                     |                                                                              |                                                                                                                                                                                                      |                                                                                                                                                                                                                                                                                                                        |                                                                                                                                                                                                                                                                                                          |                                                                                                           |                                                    | Clinicians should select one population-appropriate primary screening tool and consider others for specific situations. For example, if one has very little time available, the Clock Drawing Test may be the most useful screening tool, whereas the Hopkins Verbal Learning Test may be superior in mildly impaired or highly educated patients. The MMSE has been evaluated most extensively, but current copyright restrictions limit its use, and diagnostic inaccuracy is a problem in relationship to educational levels. High-functioning, educated populations can be tested with instruments demonstrating less ceiling effect, but so far these tools are more time consuming. |
| Turner, 2012, Washington University in St Louis, St Louis, MO, USA; ED; time frame not specified                     | N = 170; mean age 74 y; 79% had cognitive impairment by MoCA                 | English-speaking community-dwelling patients aged $\geq 65$ y                                                                                                                                        |                                                                                                                                                                                                                                                                                                                        | Randomized, single-center, cross sectional, consecutive sampling trial                                                                                                                                                                                                                                   | Brief Alzheimer's Screen (BAS), Short Blessed Test (SBT), caregiver-AD8 (cAD8)                            | MoCA                                               | BAS: sensitivity 61%, specificity 83%, LR+ 3.6, LR– 0.47, AUC 0.797<br>cAD8: sensitivity 54%, specificity 78%, LR+ 2.4, LR– 0.59, AUC 0.590<br>SBT: sensitivity 47%, specificity 89%, LR+ 4.1, LR– 0.60, AUC 0.746                                                                                                                                                                                                                                                                                                                                                                                                                                                                        |
| Heidt, 2009, Washington University in St Louis, St Louis, MO, USA; ED; time frame not specified but was done in 5 mo | N = 251; mean age 76 y; 53% had cognitive impairment (MMSE score $\leq 23$ ) | English-speaking patients over age 65 y who had not received potentially sedating medications including anti-emetics, sedative-hypnotics, or narcotic-analgesia prior to criterion standard testing. |                                                                                                                                                                                                                                                                                                                        | Prospective, cross-sectional convenience sampling                                                                                                                                                                                                                                                        | PMH, emergency physician note, nurse note, inpatient physician note documentation of cognitive impairment | MMSE                                               | Did not document cognitive impairment in patients with abnormal MMSE:<br>PMH: 86%, emergency physician: 72%, emergency nurse: 84%, inpatient physician: 60%                                                                                                                                                                                                                                                                                                                                                                                                                                                                                                                               |

(continued on next page)

Supplementary Table 1 (continued)

| Study, Location, Time Frame (* in PICO 1 & PICO 2)                                                 | No. of Patients (median or Mean Age)                                                 | Inclusion Criteria                                                                               | Exclusion Criteria                                                                                                                                                                                                                                                                                                                                                                                                                                                                                                                                                                                                                                                                                    | Study Design; Timing of Recruitment                      | Intervention: Screening Instrument or Tool Studied                                                           | Gold Standard for Dementia or Cognitive Impairment                                       | Measures of Accuracy, Reliability, Sensitivity, Specificity, Negative LR, Positive LR, Correlation Coefficients, etc                                                                                                                                                                                                   |
|----------------------------------------------------------------------------------------------------|--------------------------------------------------------------------------------------|--------------------------------------------------------------------------------------------------|-------------------------------------------------------------------------------------------------------------------------------------------------------------------------------------------------------------------------------------------------------------------------------------------------------------------------------------------------------------------------------------------------------------------------------------------------------------------------------------------------------------------------------------------------------------------------------------------------------------------------------------------------------------------------------------------------------|----------------------------------------------------------|--------------------------------------------------------------------------------------------------------------|------------------------------------------------------------------------------------------|------------------------------------------------------------------------------------------------------------------------------------------------------------------------------------------------------------------------------------------------------------------------------------------------------------------------|
| Eagles*, 2014, Civic Campus of the Ottawa Hospital; ED; June 17 –August 16, 2013                   | N = 260; age $\geq$ 75 y; mean age 83.7 (5.9) y; 38.4% had altered mental status     | 75 y or older who presented to the ED Monday to Friday between 0800 and 1600 h.                  | (1) Patients who have been previously enrolled on a prior visit within 30 d; (2) patients with known history of cognitive impairment or obviously altered or delirious; (3) patients with communication barriers, including non-English or French speaking, auditory, verbal, or visual impairment severe enough to affect cognitive testing; patients who have a decreased level of consciousness such that they are not able to respond to verbal questioning; (4) patients triaged as Canadian Triage and Acuity Scale level 1 or judged by their attending ED nurse or physician to be too critically ill; and (5) patients from long-term care/nursing homes and transfers from other hospitals. | Monday to Friday between 0800 and 1600 h                 | O3DY                                                                                                         | Folstein Mini-Mental State Exam                                                          | O3DY by nurses had a sensitivity of 84.6% (95% CI 64.3-95.0) and specificity of 54.2% (95% CI 39.3-68.3). O3DY by physicians had a sensitivity of 78.9% (95% CI 53.9-93.0) and specificity of 39.4% (95% CI 23.4-57.8)                                                                                                 |
| Carpenter, 2010, urban medical center; ED; 2 mo                                                    | N = 111; age > 65 y; mean age 77 y; 35% had cognitive impairment based on MMSE score | English-speaking patients aged $\geq$ 65 y who had not received potentially sedating medications |                                                                                                                                                                                                                                                                                                                                                                                                                                                                                                                                                                                                                                                                                                       | Cross-sectional convenience sampling                     | Caregiver-administered AD8, BAS, SBT, and the O3DY/O3DY                                                      | MMSE score $\leq$ 24                                                                     | BAS: sensitivity 100%, specificity 53%, and AUC 0.945 (95% CI 0.905-0.985)<br>SBT: sensitivity 95%, specificity 68%, and AUC 0.890 (95% CI 0.816-0.964)<br>O3DY: sensitivity 95% and specificity 51%<br>Caregiver AD8: sensitivity 87%, specificity 67%, and AUC 0.825 (95% CI 0.733-0.917)                            |
| Rodriguez-Molinero, 2010, 4 tertiary university teaching hospitals; ED; July through November 2003 | N = 101; undefined mean age or age criteria                                          |                                                                                                  |                                                                                                                                                                                                                                                                                                                                                                                                                                                                                                                                                                                                                                                                                                       | Cross-sectional; older adult patients selected at random | (1) Physician recognition of cognitive impairment, (2) cognitive data shown in the patient's medical records | S-IQCODE (Short Form of the Informant Questionnaire on Cognitive Decline in the Elderly) | 1. Concordance between the physicians' impression on the presence of cognitive impairment, and the S-IQCODE obtained from family member-carer was 0.26 (95% CI 0.06-0.45).<br>2. Concordance between information on cognitive decline from medical records and the results of the S-IQCODE was 0.47 (95% CI 0.05-0.88) |

|                                                                                                                                                                                                                                                                                                                                                  |                                                                                                                                                  |                                                                                                                                                                                                                                                                                                                                                                                                      |                                                                                                                                                                                                                                                                                                                                    |                                                                    |                                                                                                                         |                                                                                                                                                                    |                                                                                                                                     |
|--------------------------------------------------------------------------------------------------------------------------------------------------------------------------------------------------------------------------------------------------------------------------------------------------------------------------------------------------|--------------------------------------------------------------------------------------------------------------------------------------------------|------------------------------------------------------------------------------------------------------------------------------------------------------------------------------------------------------------------------------------------------------------------------------------------------------------------------------------------------------------------------------------------------------|------------------------------------------------------------------------------------------------------------------------------------------------------------------------------------------------------------------------------------------------------------------------------------------------------------------------------------|--------------------------------------------------------------------|-------------------------------------------------------------------------------------------------------------------------|--------------------------------------------------------------------------------------------------------------------------------------------------------------------|-------------------------------------------------------------------------------------------------------------------------------------|
| Huff*, 2001,<br>University of<br>Virginia; ED; 7 wk                                                                                                                                                                                                                                                                                              | N = 444; age > 55 y; Aged $\geq 55$ y<br>no mean age<br>reported; %<br>cognitive<br>impairment not<br>reported; care<br>partners not<br>reported | Head trauma or<br>multisystem trauma,<br>inability to speak English,<br>educational level of $\leq 7$ y,<br>acute medical illness, or<br>contact or droplet<br>isolation, patients that the<br>research assistants felt<br>might be harmed by<br>mental distress or other<br>discomfort by test<br>administration                                                                                    | Prospective comparison of the<br>QCS and the MMSE in a<br>convenience sample; 16 h per<br>day for a total of roughly 80 h<br>per week for a 7-wk period                                                                                                                                                                            | QCS                                                                | MMSE score                                                                                                              | QCS scores were significantly<br>correlated ( $r = 0.783$ ) with MMSE<br>scores                                                                                    |                                                                                                                                     |
| Gerson*, 1994,<br>Community<br>teaching hospital;<br>ED; 3 mo (March<br>1, 1991–May 31,<br>1992)                                                                                                                                                                                                                                                 | N = 547; age > 65 y;<br>mean age 76.7 y<br>( $\pm 7.7$ SD); 33.5%<br>had cognitive<br>impairment based<br>on OMCT                                | Refusal to participate,<br>physical condition<br>prevented participation,<br>known dementia, unable<br>to communicate in<br>English                                                                                                                                                                                                                                                                  | ED social worker enrolled 7 AM<br>to 3 PM Monday to Friday.<br>Medical students enrolled in<br>3 different blocks: evenings 3<br>PM–7 PM, weekend days 7 AM<br>–3 PM, nights 11 PM–7 AM. Five<br>shifts per week were<br>randomly selected in a 3:2:1<br>ratio to approximate patient<br>flow and medical student<br>availability. | Logistic regression<br>model to predict<br>cognitive<br>impairment | 6-item OMCT                                                                                                             | Predictors of cognitive impairment<br>were age >80 y (adjusted OR 3.68,<br>95% CI 2.21–6.14) and living in<br>nursing home (adjusted OR 13.8,<br>95% CI 3.79–50.2) |                                                                                                                                     |
| Zaffarana, 2013,<br>Florence, Italy;<br>ED; January 1,<br>2010, to<br>December 31,<br>2010                                                                                                                                                                                                                                                       | N = 169; age > 75 y;<br>mean age 83 $\pm$<br>5.3 y; 18.9% had<br>dementia                                                                        | Subjects triaged as very low<br>severity (“white” code) or<br>with communication<br>disorders                                                                                                                                                                                                                                                                                                        | Retrospective analysis                                                                                                                                                                                                                                                                                                             |                                                                    | Reported by a<br>patient’s kin or<br>when specific<br>indication and/or<br>therapy were<br>recorded in medical<br>chart |                                                                                                                                                                    |                                                                                                                                     |
| Gagne, 2018, CHU<br>de Quebec<br>–Hôpital de<br>l’Enfant-Jésus<br>(Quebec City), the<br>CHU de Quebec<br>–CHUL (Quebec<br>City), the Hôpital<br>de Trois-Rivières<br>(Trois-Rivières),<br>and the Centre<br>Hospitalier de<br>Lanaudière<br>(Lanaudière); ED;<br>6–8 wk at each<br>participating<br>center (between<br>February and May<br>2016) | N = 320; age > 65 y;<br>mean age 76.8 (7.4)<br>y                                                                                                 | Patients aged $\geq 65$ y who<br>were independent or<br>semi-independent (able to<br>perform at least 5<br>activities of daily living),<br>had an 8-h exposure to<br>the ED environment from<br>the time of registration<br>(because of the high<br>frequency of delirium<br>with prolonged periods of<br>stay in the ED), and were<br>admitted (or waiting to be<br>admitted) to a hospital<br>ward | Lived in a nursing home or<br>long-term care facility,<br>had an unstable medical<br>state that could lead to<br>intensive care, could not<br>communicate in French,<br>or were unable to provide<br>consent. Finally, patients<br>with a history of a<br>psychiatric disorder were<br>also excluded.                              | Prospective comparison of 4AT-<br>F and TICS-m                     | French version of the<br>4 A’s Test (4AT-F)                                                                             | Telephone Interview<br>for Cognitive Status<br>(TICS-m)                                                                                                            | Sensitivity 49% (34, 64), specificity<br>87% (82, 92), PPV 48% (33, 63), NPV<br>88% (74, 85), positive LR 3.77,<br>negative LR 0.59 |
| Marlow, 2010, Data<br>from National<br>Hospital<br>Ambulatory<br>Medical Care<br>Survey<br>(NHAMCS); ED;<br>2005–2006                                                                                                                                                                                                                            | None reported                                                                                                                                    |                                                                                                                                                                                                                                                                                                                                                                                                      |                                                                                                                                                                                                                                                                                                                                    |                                                                    | Orientation to person,<br>place, and time                                                                               | Patient self-reported<br>reason for visit                                                                                                                          | Sensitivity: 50.15% (SE = 4.27)                                                                                                     |

(continued on next page)

Supplementary Table 1 (continued)

| Study, Location, Time Frame (* in PICO 1 & PICO 2)                                         | No. of Patients (median or Mean Age)                                                                        | Inclusion Criteria                                                                                                                                                                                                                                              | Exclusion Criteria                                                                                                                                                                                                                                                                                                                                                 | Study Design; Timing of Recruitment                                                                                                                                                     | Intervention: Screening Instrument or Tool Studied                                                            | Gold Standard for Dementia or Cognitive Impairment | Measures of Accuracy, Reliability, Sensitivity, Specificity, Negative LR, Positive LR, Correlation Coefficients, etc                                                                                                                                                                                                                                                                                                                                                                                                                                             |
|--------------------------------------------------------------------------------------------|-------------------------------------------------------------------------------------------------------------|-----------------------------------------------------------------------------------------------------------------------------------------------------------------------------------------------------------------------------------------------------------------|--------------------------------------------------------------------------------------------------------------------------------------------------------------------------------------------------------------------------------------------------------------------------------------------------------------------------------------------------------------------|-----------------------------------------------------------------------------------------------------------------------------------------------------------------------------------------|---------------------------------------------------------------------------------------------------------------|----------------------------------------------------|------------------------------------------------------------------------------------------------------------------------------------------------------------------------------------------------------------------------------------------------------------------------------------------------------------------------------------------------------------------------------------------------------------------------------------------------------------------------------------------------------------------------------------------------------------------|
| Carpenter, 2010, Washington University in St Louis; ED                                     | N = 105; age > 65 y; mean age 77 y; 31% with cognitive impairment; N/A for care partners                    | Adults aged ≥65 y                                                                                                                                                                                                                                               |                                                                                                                                                                                                                                                                                                                                                                    | Convenience sampling                                                                                                                                                                    | MMSE administered at home after 3 wk follow-up                                                                | MMSE score <24 in ED                               | Cognitive dysfunction (MMSE < 24) was present in 31% in the ED, including 5% with delirium. At follow-up, 26% had cognitive dysfunction and none had delirium.                                                                                                                                                                                                                                                                                                                                                                                                   |
| Dziedzic*, 1998, University of Virginia School of Medicine, Charlottesville, VA; ED; 2½ wk | N = 31; age ≥ 65 y; mean/median age not reported; 61% cognitive impairment; N/A for care partners           | 65 y or older, absence of recent head or multisystem trauma; able to speak English as a primary language; not be acutely experiencing alcohol or substance intoxication; score of 15 on the Glasgow Coma Scale; and educational level equivalent to 9 y or more |                                                                                                                                                                                                                                                                                                                                                                    | Patient sample was collected in a time period of 2½ wk, during shifts randomly distributed among 3 attending emergency medicine physicians. Shifts during daytime hours were maximized. | Physician perception of cognitive impairment                                                                  | MMSE score                                         | MMSE findings agreed with the treating physicians' assessments in 21 (67%) cases                                                                                                                                                                                                                                                                                                                                                                                                                                                                                 |
| Shah, 2009, Monroe County, NY; EMS and ED; June-December 2007                              | N = 187; age ≥ 60 y; mean age 75.6 ± 9.2 y; 8.6% had a medical history of dementia                          | Community-dwelling patients aged ≥60 y who requested emergency assistance                                                                                                                                                                                       | Did not speak English or refused transport                                                                                                                                                                                                                                                                                                                         | Cross-sectional                                                                                                                                                                         | EMS SIS                                                                                                       | ED Mini-Cog, ED CLOX1, ED CLOX2                    | Compared to Mini-Cog: sensitivity 29% (20%-39%), specificity 96% (88%-99%)<br>Compared to CLOX1: sensitivity 21% (13%-31%), specificity 93% (82%-98%)<br>Compared to CLOX2: sensitivity 23% (14%-35%), specificity 92% (83%-97%)                                                                                                                                                                                                                                                                                                                                 |
| Schofield, 2010, Glasgow, UK; accident and emergency (A&E); February-August 2007           | N = 601; age ≥ 65 y; mean age 77 y; 37.6% with cognitive impairment (MMSE score ≤23); N/A for care partners | Adults aged ≥ 65 y                                                                                                                                                                                                                                              | Verbal communication categorized as none, or sounds only according to the Glasgow Coma Scale, learning disability, severe hearing disability, unable to speak English and lack of interpreter                                                                                                                                                                      | Convenience sampling, focusing on periods of high attendance by older patients                                                                                                          | AMT10 (different cutoffs), AMT4 (different cutoffs), receiving nurse's judgment                               | MMSE score ≤24                                     | Nurse's judgment: sensitivity 50.5% (44%-57%), specificity 98.6% (96%-100%), PPV 97% (92%-99%), NPV 69% (65%-73%)<br>AMT4 cutoff 3/4: sensitivity 80% (75-85), specificity 88% (84-91), PPV 84% (78-88%), NPV 85% (81-89%)<br>AMT10 cutoff 7/10: sensitivity 76% (69%-81%), specificity 93% (90%-96%), PPV 90% (84%-93%), NPV 83% (79%-87%)                                                                                                                                                                                                                      |
| Carpenter*, 2011, Barnes Jewish Hospital, St Louis, MO; ED; July 1, 2008-April 20, 2009    | N = 319; age ≥65 y; mean age 76 y; 35.4% (31%-41%)                                                          | All ED patients aged ≥65 y                                                                                                                                                                                                                                      | Patients who received medications that may have affected their mental status during the testing period (narcotics, benzodiazepines, antiemetics), were too critically ill to participate, as judged by the attending emergency physician, were unable to consent or cooperate with data acquisition, did not speak English, or refused to complete the questioning | Prospective, cross-sectional, convenience sampling. Enrollment occurred weekdays and weekends during equally distributed day, evening, and overnight shifts                             | SIS, AD8 (caregiver and patient), combined SIS and caregiver AD8 (cAD8; abnormal SIS or abnormal cAD8 result) | Mini-Mental State Examination score ≤24            | SIS: sensitivity 74% (68%-80%), specificity 77% (74%-80%), positive LR 3.3 (2.5-4.1), negative LR 0.33 (0.25-0.44), AUC 0.83 (0.78-0.87)<br>cAD8: sensitivity 63% (53%-72%), specificity 79% (73%-85%), positive LR 3.0 (1.9-4.6), negative LR 0.44 (0.31-0.62), AUC 0.74 (0.65-0.81)<br>pAD8: sensitivity 37% (28%-46%), specificity 82% (77%-86%), positive LR 2.0 (1.1-3.3), negative LR 0.77 (0.63-0.93), AUC 0.67 (0.60-0.74)<br>SIS or cAD8: sensitivity 89% (80%-95%), specificity 70% (63%-73%), positive LR 3.0 (2.3-3.6), negative LR 0.16 (0.07-0.30) |

|                                                                                         |                                                                                                          |                                  |                                                                                                                                                                                                                                                                                                                                                                            |                                                    |                          |                      |                                                                                                                                                                                                                                                                                                                                                                                                                                                                                                                                                                                                                                                                                                                                                                                                                                                                                                       |
|-----------------------------------------------------------------------------------------|----------------------------------------------------------------------------------------------------------|----------------------------------|----------------------------------------------------------------------------------------------------------------------------------------------------------------------------------------------------------------------------------------------------------------------------------------------------------------------------------------------------------------------------|----------------------------------------------------|--------------------------|----------------------|-------------------------------------------------------------------------------------------------------------------------------------------------------------------------------------------------------------------------------------------------------------------------------------------------------------------------------------------------------------------------------------------------------------------------------------------------------------------------------------------------------------------------------------------------------------------------------------------------------------------------------------------------------------------------------------------------------------------------------------------------------------------------------------------------------------------------------------------------------------------------------------------------------|
| Carpenter*, 2011, Barnes Jewish Hospital, St Louis, MO; ED; June 10, 2009–March 9, 2010 | N = 169; age $\geq 65$ y; mean age $78 \pm 8$ y; 37% (29%-45%); n = 91 (56%) had care partners available | All ED patients aged $\geq 65$ y | Patients receiving mental status–altering medications (antiemetics, benzodiazepines, or narcotics) prior to or during the testing period, emergency physician judgment of critical illness precluding informed consent or safe data collection, subject inability to consent or comply with data acquisition, non-English speaking, or refusal to complete the questioning | Prospective, cross-sectional, convenience sampling | O3DY, BAS, SBT, and cAD8 | MMSE score $\leq 23$ | <p>SBT: sensitivity 95% (88%-98%), specificity 65% (61%-67%), positive LR 2.7 (2.2-3.0), negative LR 0.08 (0.03-0.2), AUC 0.930 (0.862-0.971)</p> <p>BAS: sensitivity 95% (88%-98%), specificity 52% (48%-54%), positive LR 2.0 (1.7-2.2), negative LR 0.10 (0.03-0.3), AUC 0.934 (0.867-0.974)</p> <p>O3DY: sensitivity 95% (85%-99%), specificity 51% (46%-53%), positive LR 2.0 (1.6-2.1), negative LR 0.10 (0.03-0.3)</p> <p>cAD8: sensitivity 83% (71%-91%), specificity 63% (55%-68%), positive LR 2.2 (1.6-2.8), negative LR 0.27 (0.1-0.5), AUC 0.816 (0.727-0.886)</p> <p>SBT or cAD8: sensitivity 91% (81%-97%), specificity 27% (20%-30%), positive LR 1.2 (1.0-1.4), negative LR 0.32 (0.1-0.9)</p> <p>BAS or cAD8: sensitivity 97% (90%-99%), specificity 11% (6%-12%), positive LR 1.1 (0.9-1.1), negative LR 0.27 (0.04-1.6)</p> <p>O3DY or cAD8: sensitivity 100%, specificity 0%</p> |
|-----------------------------------------------------------------------------------------|----------------------------------------------------------------------------------------------------------|----------------------------------|----------------------------------------------------------------------------------------------------------------------------------------------------------------------------------------------------------------------------------------------------------------------------------------------------------------------------------------------------------------------------|----------------------------------------------------|--------------------------|----------------------|-------------------------------------------------------------------------------------------------------------------------------------------------------------------------------------------------------------------------------------------------------------------------------------------------------------------------------------------------------------------------------------------------------------------------------------------------------------------------------------------------------------------------------------------------------------------------------------------------------------------------------------------------------------------------------------------------------------------------------------------------------------------------------------------------------------------------------------------------------------------------------------------------------|

(continued on next page)



**Supplementary Table 1** (continued)

| Study, Location, Time Frame (* in PICO 1 & PICO 2)                                      | No. of Patients (median or Mean Age)                       | Inclusion Criteria                                                                                                   | Exclusion Criteria                                                                                                                                                                                                                                                                                                                                                                                                                                                                                                                                                                                                                                                                                                                                                                                                                                                                                                                            | Study Design; Timing of Recruitment | Intervention: Screening Instrument or Tool Studied                                       | Gold Standard for Dementia or Cognitive Impairment | Measures of Accuracy, Reliability, Sensitivity, Specificity, Negative LR, Positive LR, Correlation Coefficients, etc                                                                                                                                                                                                                                                                                      |
|-----------------------------------------------------------------------------------------|------------------------------------------------------------|----------------------------------------------------------------------------------------------------------------------|-----------------------------------------------------------------------------------------------------------------------------------------------------------------------------------------------------------------------------------------------------------------------------------------------------------------------------------------------------------------------------------------------------------------------------------------------------------------------------------------------------------------------------------------------------------------------------------------------------------------------------------------------------------------------------------------------------------------------------------------------------------------------------------------------------------------------------------------------------------------------------------------------------------------------------------------------|-------------------------------------|------------------------------------------------------------------------------------------|----------------------------------------------------|-----------------------------------------------------------------------------------------------------------------------------------------------------------------------------------------------------------------------------------------------------------------------------------------------------------------------------------------------------------------------------------------------------------|
| Huang, 2020, Taipei Veterans General Hospital, Taiwan; ED; August 2018 to February 2019 | N = 106; age $\geq$ 75 y; mean age $87.3 \pm 5.2$ y; 58.5% | Admission in the observation room of the ED, age of $\geq$ 75 y, and willingness to provide written informed consent | (1) Unstable clinical conditions, eg, using high-flow oxygen supplement, inotropic agents with pump, or emergent diseases, eg, acute myocardial infarction, cerebrovascular accident, surgical indication, sepsis; (2) diagnosed with malignant tumors within 3 y who were not in a stable disease state, including the need to receive tumor-related treatment or to receive unacceptable conditions for palliative care; (3) with autoimmune diseases who were not in a stable disease state requiring immunosuppressive agents to reach therapeutic targets; (4) unable to cooperate with blood evaluation or routine physiology test (eg, old stroke with bed-ridden status, aphasia, confusion, or unconsciousness, hemiplegia); (5) unwilling to participate in the trial; (6) unwilling to provide informed consent; (7) unable to cooperate with long-term follow-up assessment; and (8) subjects who had been enrolled in this study | Prospective, cross-sectional        | Demographics, handgrip strength, and blood markers as predictors of cognitive impairment | Chinese MMSE score <23                             | The independent predictor of cognitive impairment was handgrip strength (OR 0.86, 95% CI 0.80-0.94; $P < .001$ ) and age (OR 1.15, 95% CI 1.02-1.29; $P < .05$ ).<br>TNF- $\alpha$ , IL-6, and visfantin were higher in the cognitive impairment group compared to controls, albumin was lower. IL-6 was higher in the dementia group compared with those in the cognitive impairment –no dementia group. |

|                                                         |                                                                                               |                                                                                                                                                                                                                                                                                                                                                                                                                                                                                                                                                                                                                                                                                                                    |                                                          |                                                                                                                          |                                                                                     |                                                                                                                                                                      |                                                                                                                                                                                                                                                                                                                                                                                                                                                                                                                                                                                         |
|---------------------------------------------------------|-----------------------------------------------------------------------------------------------|--------------------------------------------------------------------------------------------------------------------------------------------------------------------------------------------------------------------------------------------------------------------------------------------------------------------------------------------------------------------------------------------------------------------------------------------------------------------------------------------------------------------------------------------------------------------------------------------------------------------------------------------------------------------------------------------------------------------|----------------------------------------------------------|--------------------------------------------------------------------------------------------------------------------------|-------------------------------------------------------------------------------------|----------------------------------------------------------------------------------------------------------------------------------------------------------------------|-----------------------------------------------------------------------------------------------------------------------------------------------------------------------------------------------------------------------------------------------------------------------------------------------------------------------------------------------------------------------------------------------------------------------------------------------------------------------------------------------------------------------------------------------------------------------------------------|
| Calf*, 2021, various locations; ED; various time frames | Mean or median age of the study population included in the studies ranged from 75.4 to 81.9 y | <p>Studies were considered eligible for review when they met the following criteria:</p> <p>Cohort study or case-control study</p> <p>Study population consisted of patients with a mean or median age <math>\geq 65</math> y, visiting an ED.</p> <p>The target condition was cognitive impairment irrespective of the etiology. The diagnosis was based on the <i>DSM</i> criteria (version III, IV, IV-R, V) made by a specialist in geriatric care. CAM and MMSE were accepted as a substitute gold standard because of their wide use in clinical practice.</p> <p>The index test was an instrument to assess cognition in the ED.</p> <p>The study provided sufficient data to construct a 2-by-2 table.</p> | Studies conducted in a different environment than the ED | Systematic review and meta-analysis for diagnostic accuracy of tests detecting cognitive impairment (including delirium) | Ten different tests: 4AT, 6-CIT/SBT, AFT, AMT, AMT4, BAS, Mini-Cog, O3DY, SIS, cAD8 | Eight studies used the MMSE as reference standard with cutoff values varying from $\leq 26$ to $< 24$ points, and 1 study used the <i>DSM</i> criteria for dementia. | <p>O3DY: no. of studies: 3, no. of patients: 518, pooled sensitivity 0.90 (95% CI 0.71-0.97), pooled specificity 0.61 (95% CI 0.47-0.73)</p> <p>6-CIT/SBT: no. of studies: 3, no. of patients: 685, pooled sensitivity 0.89 (95% CI 0.78-0.95), pooled specificity 0.67 (95% CI 0.56-0.77)</p> <p>cAD8: no. of studies: 2, no. of patients: 482, pooled sensitivity 0.75 (95% CI 0.52-0.89), pooled specificity 0.71 (95% CI 0.52-0.85)</p> <p>SIS: no. of studies: 3, no. of patients: 746, pooled sensitivity 0.72 (95% CI 0.59-0.82), pooled specificity 0.79 (95% CI 0.75-0.83)</p> |
|---------------------------------------------------------|-----------------------------------------------------------------------------------------------|--------------------------------------------------------------------------------------------------------------------------------------------------------------------------------------------------------------------------------------------------------------------------------------------------------------------------------------------------------------------------------------------------------------------------------------------------------------------------------------------------------------------------------------------------------------------------------------------------------------------------------------------------------------------------------------------------------------------|----------------------------------------------------------|--------------------------------------------------------------------------------------------------------------------------|-------------------------------------------------------------------------------------|----------------------------------------------------------------------------------------------------------------------------------------------------------------------|-----------------------------------------------------------------------------------------------------------------------------------------------------------------------------------------------------------------------------------------------------------------------------------------------------------------------------------------------------------------------------------------------------------------------------------------------------------------------------------------------------------------------------------------------------------------------------------------|

(continued on next page)

Supplementary Table 1 (continued)

| Study, Location, Time Frame (* in PICO 1 & PICO 2)                                   | No. of Patients (median or Mean Age)                                                             | Inclusion Criteria                 | Exclusion Criteria                                                                                                                                                                                                                                                                                                                                                                                                                                                                                                                                                                                                                                                                                                                                                                                                            | Study Design; Timing of Recruitment                                                                        | Intervention: Screening Instrument or Tool Studied                                      | Gold Standard for Dementia or Cognitive Impairment | Measures of Accuracy, Reliability, Sensitivity, Specificity, Negative LR, Positive LR, Correlation Coefficients, etc                                                                                                                                                                                                                                                                                                                                                |
|--------------------------------------------------------------------------------------|--------------------------------------------------------------------------------------------------|------------------------------------|-------------------------------------------------------------------------------------------------------------------------------------------------------------------------------------------------------------------------------------------------------------------------------------------------------------------------------------------------------------------------------------------------------------------------------------------------------------------------------------------------------------------------------------------------------------------------------------------------------------------------------------------------------------------------------------------------------------------------------------------------------------------------------------------------------------------------------|------------------------------------------------------------------------------------------------------------|-----------------------------------------------------------------------------------------|----------------------------------------------------|---------------------------------------------------------------------------------------------------------------------------------------------------------------------------------------------------------------------------------------------------------------------------------------------------------------------------------------------------------------------------------------------------------------------------------------------------------------------|
| Barbic, 2018, Vancouver, Canada (not specifically mentioned); ED; June-November 2016 | N = 117; age ≥ 75 y; median age 81.9 y (IQR 77-85); 12.0% (95% CI 6.1%-17.9%); N/A for caregiver | Aged ≥75 y and presented to the ED | Patients triaged as Canadian Emergency Department Triage and Acuity Scale level 1 (resuscitation); if their condition was deemed too critical for evaluation; patients requiring emergent ED administration of medications that might negatively affect their neurologic and/or executive function (eg, opioids, benzodiazepines); patients with significant communication barriers affecting evaluation (eg, visual, verbal, or auditory impairments); patients with overt hallucinations, agitation, or confusion; patients who did not speak English; patients from nursing homes or long-term care facilities; patients with a previous diagnosis of cognitive impairment (eg, patients with dementia); patients already enrolled in the study and patients unable to provide full, written, informed consent in English. | Prospective, cross-sectional, convenience sampling. Recruitment was Monday to Friday between 9 AM and 4 PM | O3DY and SBT                                                                            | MMSE score ≤24                                     | O3DY: Sensitivity: 71.4% (95% CI 47.8-95.1), specificity: 56.3% (46.7%-65.9%), AUC: 0.51 (95% CI 0.42-0.61), positive LR: 1.63 (1.10-2.43), negative LR: 0.51 (0.22-1.18). The O3DY and MMSE scores agreed in 58.1% of cases.<br>SBT: sensitivity: 85.7% (67.4%-99.9%), specificity: 58.3% (48.7%-67.8%), AUC: 0.52 (95% CI 0.43-0.61), positive LR: 2.05 (1.50-2.81), negative LR: 0.25 (0.07-0.89). The SBT score agreed with the MMSE score in 61.5% of cases.   |
| Roth, 2015, Pittsburgh, PA, USA; ED                                                  | N = 806; age ≥65 y; 58.2% with cognitive impairment                                              | Aged ≥65 y and presented to the ED |                                                                                                                                                                                                                                                                                                                                                                                                                                                                                                                                                                                                                                                                                                                                                                                                                               | Prospective observational study. Convenience sampling.                                                     | Multiple logistic regression model identifying factors predicting cognitive impairment. | SBT score ≥ 4                                      | A model of age >85 y (AOR 2.04, 95% CI 1.22-3.13), Black race (AOR 1.8, 95% CI 1.3-2.5), less than high school education (AOR 2.1, 95% CI 1.6-2.9), any fall in past year (AOR 1.8, 95% CI 1.2-2.4), any potentially inappropriate medication (AOR 1.4, 95% CI 1.1-1.94) had moderate predictive accuracy for cognitive impairment (AUC = 0.66). A score of 2 would produce a sensitivity of 72.0%, specificity of 51.6%, positive LR of 1.49, negative LR of 0.54. |

|                                                            |                                                                                                          |                                                                                                                                                                                                                       |                                                                                                                                                                                                                                                                                                                                                                                   |                                                                      |                              |                        |                                                                                                                                                                                                                                                                                                                                                                                                                                                                                                                                                                                                                                                                                                 |
|------------------------------------------------------------|----------------------------------------------------------------------------------------------------------|-----------------------------------------------------------------------------------------------------------------------------------------------------------------------------------------------------------------------|-----------------------------------------------------------------------------------------------------------------------------------------------------------------------------------------------------------------------------------------------------------------------------------------------------------------------------------------------------------------------------------|----------------------------------------------------------------------|------------------------------|------------------------|-------------------------------------------------------------------------------------------------------------------------------------------------------------------------------------------------------------------------------------------------------------------------------------------------------------------------------------------------------------------------------------------------------------------------------------------------------------------------------------------------------------------------------------------------------------------------------------------------------------------------------------------------------------------------------------------------|
| Eagles*, 2020, Ottawa, Canada; ED; June–August 2013        | N = 260; age $\geq 75$ y; mean age 83.7 y                                                                | Aged $\geq 75$ y and presented to the ED                                                                                                                                                                              | Patients who had a known history of cognitive impairment or were obviously cognitively impaired; were non-English- or French-speaking patients; had auditory, verbal, or visual impairments severe enough to affect cognitive testing; were critically ill; resided in a long-term care home or were transferred from other hospitals.                                            | Prospective cohort. Monday to Friday between 0800 and 1600 h         | O3DY                         | MMSE score $<25$       | When completed by nurses: (WORLD reversal) Agreement O3DY score and MMSE = 64.9%<br>Sensitivity: 84.6% (95% CI 64.3–95.0)<br>Specificity (95% CI): 54.2% (95% CI 39.3–68.4)<br>When completed by nurses: (Serial 7s) Agreement O3DY score and MMSE = 67.7%<br>Sensitivity: 81.5% (95% CI 61.3–93.0).<br>Specificity: 57.1% (95% CI 39.5–73.2).<br>When completed by physicians: (WORLD reversal) Agreement O3DY score and MMSE = 53.8%<br>Sensitivity: 78.9% (95% CI 53.9–93.0)<br>Specificity: 39.4% (95% CI 23.4–57.8)<br>When completed by physicians: (Serial 7s) Agreement O3DY score and MMSE = 51.2%<br>Sensitivity: 70.0% (95% CI 45.7–87.2).<br>Specificity: 34.8% (95% CI 17.2–57.1). |
| Wilber, 2005, Akron, OH, USA; ED; fall of 2003             | N = 150; age $\geq 65$ y; mean age 75 ( $\pm 7$ ) y; 23% with cognitive impairment                       | All patients aged $\geq 65$ y who were able to communicate in English                                                                                                                                                 | Unable or unwilling to perform testing, those who were medically unstable, and those who received medications during the study that could affect their mental status                                                                                                                                                                                                              | Prospective, randomized, cross-sectional study. Convenience sampling | SIS, Mini-Cog                | MMSE score $\leq 23$   | SIS: sensitivity 94% (95% CI 73–100), specificity 86% (95% CI 74–94), PPV 68% (95% CI 46–85), NPV 98% (95% CI 89–100), AUC 0.96 (95% CI 0.92–1.0)<br>Mini-Cog: sensitivity 75% (95% CI 48–93), specificity 85% (95% CI 73–93), PPV 57% (95% CI 34–78), NPV 93% (95% CI 82–98)                                                                                                                                                                                                                                                                                                                                                                                                                   |
| Stair*, 2007, Boston, MA, USA; ED; June 2002 –October 2003 | N = 684 (666 completed both MMSE and QCS); age $> 18$ y; mean age $48 \pm 18$ y                          | Age $> 18$ y, ability to speak English or Spanish, and ability to answer questions                                                                                                                                    |                                                                                                                                                                                                                                                                                                                                                                                   | Prospective study                                                    | QCS                          | MMSE score $\leq 23$   | Sensitivity 64%, specificity 85%<br>For patients aged $> 55$ y, the sensitivity was 64% and specificity 82%; for those with $> 8$ y of education, the sensitivity was 59% and specificity 86%                                                                                                                                                                                                                                                                                                                                                                                                                                                                                                   |
| Lague*, 2018, Quebec, Canada; ED; March–July 2015          | N = 171; age $\geq 65$ y; mean age 76.9 (8.3) y; 22% with cognitive impairment based on TICS-m $\leq 27$ | (1) Were aged $\geq 65$ y; (2) were independent or semi-independent (can perform 5 of the 7 activities of daily living without any help); (3) spent $\geq 8$ h in the ED; and (4) were admitted to any hospital ward. | (1) Were living in a long-term care facility; (2) were unable to consent; (3) were unable to communicate in French or English; (4) were experiencing an unstable medical condition leading to their admission to the intensive care unit (ICU); (5) had a previous diagnosis of severe dementia or any other psychiatric condition; or (6) had delirium during their 8-h ED stay. | Prospective observational cohort                                     | Bergman-Paris Question (BPQ) | TICS-m score $\leq 27$ | Sensitivity 86.5% (95% CI 71.2–95.5), specificity 27.8% (95% CI 20.4–36.3), PPV 25.0% (95% CI 17.8–33.4), NPV 88.1% (95% CI 74.4–96.0), AUC 0.57 (95% CI 0.50–0.64), adjusted AUC for age and sex 0.71 (95% CI 0.62–0.80)                                                                                                                                                                                                                                                                                                                                                                                                                                                                       |

(continued on next page)

**Supplementary Table 1** (continued)

| Study, Location, Time Frame (* in PICO 1 & PICO 2)              | No. of Patients (median or Mean Age)                                                                                                                                                                                                                                                                      | Inclusion Criteria                                                                                                                                          | Exclusion Criteria                                                                                                                                                                                                                                                                                                                                                                                                                                                                                                        | Study Design; Timing of Recruitment                                     | Intervention: Screening Instrument or Tool Studied | Gold Standard for Dementia or Cognitive Impairment | Measures of Accuracy, Reliability, Sensitivity, Specificity, Negative LR, Positive LR, Correlation Coefficients, etc                                                     |
|-----------------------------------------------------------------|-----------------------------------------------------------------------------------------------------------------------------------------------------------------------------------------------------------------------------------------------------------------------------------------------------------|-------------------------------------------------------------------------------------------------------------------------------------------------------------|---------------------------------------------------------------------------------------------------------------------------------------------------------------------------------------------------------------------------------------------------------------------------------------------------------------------------------------------------------------------------------------------------------------------------------------------------------------------------------------------------------------------------|-------------------------------------------------------------------------|----------------------------------------------------|----------------------------------------------------|--------------------------------------------------------------------------------------------------------------------------------------------------------------------------|
| Bedard*, 2017, Quebec, Canada; ED; February-May 2016            | N = 313; age ≥65 y; mean age 76.8 (7.5) y; 27.2% with cognitive impairment, TICS-m score ≤27                                                                                                                                                                                                              | (1) Age ≥ 65 y; (2) an ED length of stay ≥8 h; (3) awaiting admission to a care unit; and (4) independent or semiindependent for activities of daily living | (1) Had an unstable medical condition that could lead to intensive care; (2) inability to communicate in French; (3) unable to consent; (4) history of a severe psychiatric condition (eg, schizophrenia, severe depression, or bipolar disorder); and (5) were living in a nursing home or another long-term care center                                                                                                                                                                                                 | Prospective study                                                       | O3DY-F (French) score < 4                          | TICS-m score <27                                   | Sensitivity 76.2% (66.7%-84.8%), specificity 67.6% (61.0%-73.6%), PPV 46.7% (38.1%-55.4%), NPV 88.4% (82.6%-92.8%), positive LR 2.4, negative LR 0.4                     |
| Rodríguez-Molinero, 2010, Madrid, Spain; ED; July-November 2003 | N = 98; age ≥ 65 y; mean age 81.7 ± 7.3 y; 48% positive on cognitive impairment with Pfeiffer test; 66% were women and mean age was 56.1 y (±12.6 y); 64.4% were children of patients, 18.8% were spouses, and 15.8% other family members; 1% of informants had no family relationship with the patients. | Patients older than 80 y, and patients between 65 and 79 y, provided that the latter had at least 2 comorbid chronic conditions                             | Those who had no available informant, who failed to sign the informed consent, who had no clinical history of emergencies, or whose physician failed to meet the criteria outlined below: Once a patient had been selected, one of the physicians declaring themselves responsible for the patient was required to participate. The highest ranking physician was selected, with those who had less than 1 year of experience or had already participated in the study in connection with another patient being excluded. | Cross-sectional; weekdays and weekends based on researcher availability | Physician perception of cognitive impairment       | IQCODE                                             | Concordance (κ) between IQCODE obtained from the relatives and physicians' perceptions of cognitive impairment was 0.26 (95% CI 0.06-0.45; power of the comparison, 95%) |

|                                                          |                                                                                                                                   |                                                                                                                                                                                                                                                                                                                                                                                                      |                                                                                                                                                                                                                                                                                                                                                                                                                      |                                                                |                                              |                     |                                                                                                                                               |
|----------------------------------------------------------|-----------------------------------------------------------------------------------------------------------------------------------|------------------------------------------------------------------------------------------------------------------------------------------------------------------------------------------------------------------------------------------------------------------------------------------------------------------------------------------------------------------------------------------------------|----------------------------------------------------------------------------------------------------------------------------------------------------------------------------------------------------------------------------------------------------------------------------------------------------------------------------------------------------------------------------------------------------------------------|----------------------------------------------------------------|----------------------------------------------|---------------------|-----------------------------------------------------------------------------------------------------------------------------------------------|
| Schnitker*, 2015, Australia; ED; May 2012-February 2013  | N = 580; age $\geq 70$ y; mean age $80.3 \pm 6.7$ y                                                                               | All ED patients aged $\geq 70$ y                                                                                                                                                                                                                                                                                                                                                                     | Patients who (1) stayed $>2$ h in ED before the research nurse was available to approach them; (2) were severely ill, which prevented consent; (3) had consented for the study during a previous ED visit; (4) required an interpreter and where no suitable interpreter could be found in a timely manner (2 h); or (5) who were not able to participate in the planned phone follow-up (7 and 28 d post ED visit). | Prospective (?). Weekdays from 8 AM to 5 PM                    | Physician perception of cognitive impairment | OMCT score $\geq 9$ | Sensitivity 24% (95% CI 17-31; PPV of 88%) and specificity 96% (95% CI 92-99; NPV of 54%)                                                     |
| Ouellet*, 2016, Quebec, Canada; ED; May 2009 -March 2011 | N = 306; age $\geq 65$ y; mean age $77.0 \pm 7.2$ y; 62.4% with cognitive impairment based on MoCA $< 26$ , 22.9% for MoCA $< 21$ | (1) Be 65 y or older, (2) be presenting to the ED specifically for a minor traumatic injury (ie, soft tissue/osseous lesions such as lacerations, contusions, sprains, simple extremity fractures, minor thoracic injuries, or minor head injury), (3) be discharged home within 48 h of the ED visit, and (4) be independent in basic activities of daily living in the month prior to the ED visit | (1) Injuries leading to admission to any ward, (2) living in long-term care, (3) diagnosis of dementia, (4) delirium or confusion at the ED visit, and (5) inability to give a verbal consent, to communicate in French or English, or to attend follow-up assessments                                                                                                                                               | Prospective cohort. Any day or time; 24/7 recruitment schedule | Model predicting cognitive impairment        | MoCA score $< 26$   | Male sex, age 85 y, higher depression scores, slower walking speed, and self-reported memory problems were predictive of cognitive impairment |

(continued on next page)

Supplementary Table 1 (continued)

| Study, Location, Time Frame (* in PICO 1 & PICO 2)                                                                                                       | No. of Patients (median or Mean Age)                                                                             | Inclusion Criteria                                                                                                                                                                                                                                                                                                                                                                                                                                                                                                       | Exclusion Criteria | Study Design; Timing of Recruitment | Intervention: Screening Instrument or Tool Studied | Gold Standard for Dementia or Cognitive Impairment                                                                                      | Measures of Accuracy, Reliability, Sensitivity, Specificity, Negative LR, Positive LR, Correlation Coefficients, etc                                                                                                                                                                                                                                                                                                                                                                                                                                                                                                                                                                                                                                                                                    |
|----------------------------------------------------------------------------------------------------------------------------------------------------------|------------------------------------------------------------------------------------------------------------------|--------------------------------------------------------------------------------------------------------------------------------------------------------------------------------------------------------------------------------------------------------------------------------------------------------------------------------------------------------------------------------------------------------------------------------------------------------------------------------------------------------------------------|--------------------|-------------------------------------|----------------------------------------------------|-----------------------------------------------------------------------------------------------------------------------------------------|---------------------------------------------------------------------------------------------------------------------------------------------------------------------------------------------------------------------------------------------------------------------------------------------------------------------------------------------------------------------------------------------------------------------------------------------------------------------------------------------------------------------------------------------------------------------------------------------------------------------------------------------------------------------------------------------------------------------------------------------------------------------------------------------------------|
| Carpenter, 2019, 4 studies occurred in the United States, 2 in Canada, 2 in Ireland, and 1 in Scotland; ED; Studies were conducted between 2003 and 2016 | N = 2423 patients, N = 9 studies; age ≥ 65 y; a weighted average for dementia prevalence of 31% (range, 12%-43%) | Studies that described adults aged ≥65 y, evaluated in the ED setting with an index test for dementia and compared with an acceptable reference standard for dementia. A priori determinants of acceptable reference standards included the MMSE or more formal neuropsychological evaluation by qualified individuals (psychiatrist, neurologist, geriatrician) using <i>DSM-5</i> criteria. Studies had to provide sufficient detail on the dementia screening test and reference standard to construct 2-by-2 tables. |                    | Systematic review and meta-analysis | AMT-4, cAD8, O3DY, SBT, and the SIS                | MMSE, formal neuropsychologic evaluation by qualified individuals (psychiatrist, neurologist, geriatrician) using <i>DSM-V</i> criteria | AMT4: pooled sensitivity 0.74 (0.69-0.79), pooled specificity 0.88 (0.85-0.91), pooled positive LR 7.69 (3.46-17.10), pooled negative LR 0.31 (0.10-0.90)<br>cAD8: pooled sensitivity 0.72 (0.62-0.81), pooled specificity 0.72 (0.64-0.79), pooled positive LR 2.53 (1.82-3.51), pooled negative LR 0.39 (0.26-0.59)<br>O3DY: pooled sensitivity 0.92 (0.84-0.96), pooled specificity 0.63 (0.58-0.68), pooled positive LR 2.26 (1.45-3.52), pooled negative LR 0.17 (0.05-0.66)<br>SBT: pooled sensitivity 0.87 (0.80-0.92), pooled specificity 0.70 (0.66-0.74), pooled positive LR 2.71 (2.03-3.61), pooled negative LR 0.18 (0.09-0.39)<br>SIS: pooled sensitivity 0.69 (0.62-0.74), pooled specificity 0.81 (0.77-0.84), pooled positive LR 3.53 (2.36-5.29), pooled negative LR 0.39 (0.31-0.50) |
| Bissig*, 2019, California, USA; ED; second half of 2016                                                                                                  | N = 100; age ≥ 45 y; mean age 68 ± 12 y; 6% with previous cognitive impairment                                   | Patients ≥45 y old, who communicated in spoken English, and had been in the hospital for less than 24 h                                                                                                                                                                                                                                                                                                                                                                                                                  |                    | Cross-sectional observational study | SIS                                                | Previously documented cognitive impairment                                                                                              | Sensitivity 86%, specificity 77%                                                                                                                                                                                                                                                                                                                                                                                                                                                                                                                                                                                                                                                                                                                                                                        |

|                                                           |                                                                                                                         |                                                                                                                                       |                                                                                                                                                                                                                                                                                                                                                                                                                                                                                                                                                                  |                                                                                                      |                                              |                                                           |                                                                                                                                                                                                                                                                                                                                                                                                                                                                                                                                                                                                                                                                                                                                                                                                                                                                                                                                                                                                |
|-----------------------------------------------------------|-------------------------------------------------------------------------------------------------------------------------|---------------------------------------------------------------------------------------------------------------------------------------|------------------------------------------------------------------------------------------------------------------------------------------------------------------------------------------------------------------------------------------------------------------------------------------------------------------------------------------------------------------------------------------------------------------------------------------------------------------------------------------------------------------------------------------------------------------|------------------------------------------------------------------------------------------------------|----------------------------------------------|-----------------------------------------------------------|------------------------------------------------------------------------------------------------------------------------------------------------------------------------------------------------------------------------------------------------------------------------------------------------------------------------------------------------------------------------------------------------------------------------------------------------------------------------------------------------------------------------------------------------------------------------------------------------------------------------------------------------------------------------------------------------------------------------------------------------------------------------------------------------------------------------------------------------------------------------------------------------------------------------------------------------------------------------------------------------|
| Wilding*, 2016, Ontario, Canada; ED; January –August 2010 | N = 238; age $\geq$ 75 y; mean age 81.9 y; 13.4% with cognitive impairment based on MMSE score $<$ 25                   | Patients $\geq$ 75 y old                                                                                                              | Patients who (1) were medically unstable (abnormal vital signs, required use of opioids, or those in obvious distress, as determined by initial ED staff or geriatric emergency management nurse assessment); (2) had a preexisting diagnosis of cognitive impairment or were obviously impaired (overtly confused, agitated, or hallucinating); (3) did not live in the city of Ottawa; (4) lived in long-term care; (5) had a primary language other than English or French; or (6) had hearing or visual impairment severe enough to effect cognitive testing | Prospective cohort; convenience sampling; 7 d per week from 8 AM to 4 PM                             | O3DY and AFT                                 | MMSE score $<$ 25                                         | O3DY/MMSE: agreement 75.6% (95% CI 69.8%–80.7), sensitivity 93.8% (95% CI 77.8%–98.9%), specificity 72.8% (95% CI 66.1%–78.7%), positive LE 3.5, and negative LR 0.08.<br>AFT, cutoff score $<$ 15:<br>AFT/MMSE: agreement 46.2% (95% CI 40.0%–52.6%), sensitivity 90.6% (95% CI 73.8%–97.5%), specificity 39.3% (95% CI 32.7%–46.4%), positive LR 1.5, and negative LR 0.24.<br>AFT cutoff score $<$ 10:<br>AFT/MMSE: agreement 76.1% (95% CI 70.2%–81.0%), sensitivity 62.5% (95% CI 43.7%–78.3%), specificity 78.2% (95% CI 71.8%–83.5%), positive LR 2.9, and negative LR 0.48                                                                                                                                                                                                                                                                                                                                                                                                             |
| Carpenter, 2011, USA; ED                                  | N = 142; age $\geq$ 65 y; mean age 77 y; 34% with cognitive impairment based on MMSE score $<$ 24                       | Consenting English-speaking patients aged $\geq$ 65 y who had not received potentially sedating medications                           |                                                                                                                                                                                                                                                                                                                                                                                                                                                                                                                                                                  | Prospective, cross-sectional, convenience sampling                                                   | BAS, SBT, cAD8 stratified by education level | MMSE score $<$ 24                                         | In order of total, less than ninth-grade reading level, more than ninth-grade reading level, not graduating high school, and graduating high school<br>BAS: sensitivity 90, 93, 75, 96, 77; specificity 43, 29, 48, 28, 57; positive LR 1.6, 1.3, 1.5, 1.3, 1.8; negative LR 0.24, 0.25, 0.52, 0.16, 0.41<br>SBT: sensitivity 90, 93, 67, 87, 71; specificity 47, 38, 53, 44, 50; positive LR 1.7, 1.5, 1.4, 1.6, 1.4; negative LR 0.22, 0.20, 0.62, 0.29, 0.59<br>cAD8: sensitivity 83, 70, 100, 75, 100; specificity 65, 46, 77, 64, 67; positive LR 2.4, 1.3, 4.4, 2.1, 3; negative LR 0.26, 0.65, 0, 0.39, 0<br>BRIGHT cutoff $\geq$ 2: sensitivity 0.81 (0.66, 0.91), specificity 0.34 (0.24, 0.46), positive LR 1.2, negative LR 0.6<br>BRIGHT cutoff $\geq$ 3: sensitivity 0.78 (0.63, 0.89), specificity 0.54 (0.43, 0.66), positive LR 1.7, negative LR 0.4<br>BRIGHT cutoff $\geq$ 4: sensitivity 0.70 (0.54, 0.83), specificity 0.74 (0.62, 0.83), positive LR 2.7, negative LR 0.4 |
| Boyd*, 2008, New Zealand; ED; December 2005 –March 2006   | N = 139; age: $\geq$ 75 y (65 y for Maori and Pasifika elders); mean age 82.5 y; 35% with cognitive impairment (BRIGHT) | All those aged $\geq$ 75 y (65 y for Maori and Pasifika elders) who presented to the ED with a nonurgent complaint (triage level 3–5) | Patients who were sleeping, undergoing medical procedures, or in distress. Cognitively impaired patients were only enrolled if their family was available to assist in completing the BRIGHT.                                                                                                                                                                                                                                                                                                                                                                    | Cross-sectional convenience sampling; 4-h time blocks (Monday-Friday, 8 AM–8 PM) over a 12-wk period | BRIGHT                                       | Cognitive performance scales (different cutoffs reported) |                                                                                                                                                                                                                                                                                                                                                                                                                                                                                                                                                                                                                                                                                                                                                                                                                                                                                                                                                                                                |

(continued on next page)



Supplementary Table 1 (continued)

| Study, Location, Time Frame (* in PICO 1 & PICO 2)                                                                                                                     | No. of Patients (median or Mean Age)                                                                             | Inclusion Criteria                                                                                                                                                      | Exclusion Criteria                                                                                                                                                                                                                                                                                                        | Study Design; Timing of Recruitment                                                                                                                    | Intervention: Screening Instrument or Tool Studied | Gold Standard for Dementia or Cognitive Impairment | Measures of Accuracy, Reliability, Sensitivity, Specificity, Negative LR, Positive LR, Correlation Coefficients, etc                                                                                                                                              |
|------------------------------------------------------------------------------------------------------------------------------------------------------------------------|------------------------------------------------------------------------------------------------------------------|-------------------------------------------------------------------------------------------------------------------------------------------------------------------------|---------------------------------------------------------------------------------------------------------------------------------------------------------------------------------------------------------------------------------------------------------------------------------------------------------------------------|--------------------------------------------------------------------------------------------------------------------------------------------------------|----------------------------------------------------|----------------------------------------------------|-------------------------------------------------------------------------------------------------------------------------------------------------------------------------------------------------------------------------------------------------------------------|
| Wilber*, 2008, Summa Health System's Akron City Hospital and Washington University, Barnes-Jewish Hospital and Cleveland clinic; ED; January 12, 2006–January 14, 2007 | N = 352; age $\geq$ 65 y; mean age 77 ( $\pm$ 8) y; 32% with cognitive impairment based on MMSE                  | ED patients aged $\geq$ 65 y who were able to communicate in English                                                                                                    | Patients who received medications that may have affected their mental status during the testing period (such as narcotics, antiemetics, or benzodiazepines), were critically ill, were unable to consent or cooperate with data acquisition, were previously enrolled, or refused to complete the questioning             | Prospective, cross-sectional, convenience sampling                                                                                                     | SIS                                                | MMSE score $\leq$ 23                               | Sensitivity 63% (53, 72), specificity 81% (75, 85), PPV 60% (50, 69), NPV 83% (77, 87), positive LR 3.2 (2.4, 4.3), 0.5 (0.4, 0.6), AUC 0.77 (95% CI 0.72-0.83)                                                                                                   |
| O'Sullivan, 2018, Cork, Ireland; ED; June–November 2015                                                                                                                | N = 419; age $\geq$ 70 y; median age 77 y; 21.5% with dementia                                                   | All ED patients aged $\geq$ 70 y                                                                                                                                        | Refusal, inability to consent and no family member to give assent, being actively drunk, severe intellectual disability, requiring medical isolation, poor English, medically unstable (resuscitation room or 1:1 nursing care) and prior study recruitment                                                               | Prospective, nonconsecutive sample. Monday–Friday, 8 AM–6 PM                                                                                           | 4AT, 6-CIT (multiple cutoffs reported)             | Standardized MMSE, IQCODE, DSM-5 criteria          | 4AT (cutoff 0/1): sensitivity 0.84 (0.74-0.91), specificity 0.63 (0.57-0.69), PPV 0.39 (0.32-0.46), NPV 0.94 (0.89-0.96), AUC 0.83<br>6-CIT (cutoff 9/10): sensitivity 0.81 (0.70-0.89), specificity 0.76 (0.71-0.81), PPV 0.46 (0.37-0.55), NPV 0.94 (0.90-0.97) |
| Dyer, 2017, Dublin, Ireland; ED; June–August 2014                                                                                                                      | N = 196; age $\geq$ 70 y; mean age 78.5 $\pm$ 5.9 y; 50.1% had cognitive impairment (delirium, MCI, or dementia) | All ED patients aged $\geq$ 70 y                                                                                                                                        | Patients who were too unwell, unable to consent, or who declined assessment                                                                                                                                                                                                                                               | Prospective, cross-sectional, convenience sampling. 7 d per week both during and outside of working hours (outside of 0900 and 1700 h and on weekends) | AMT4                                               | CAM-ICU + AD8 + sMMSE (either positive)            | Sensitivity 0.53 (0.42-0.63), specificity 0.96 (0.89-0.99), PPV 94.6% (84.9%-98.8%), NPV 73.33% (65.9%-79.9%), AUC 0.75 (0.68-0.82), positive LR 14.7 (4.7-45.4), negative LR 0.5 (0.4-0.6)                                                                       |
| Bedard, 2019, Quebec, Canada; ED; February–May 2016                                                                                                                    | N = 313; age $\geq$ 65 y; mean age 76.8 (7.5) y; 27.2% with cognitive impairment, TICS-m score $\leq$ 27         | (1) age $\geq$ 65 y; (2) an ED length of stay $\geq$ 8 h; (3) awaiting admission to a care unit; and (4) independent or semi-independent for activities of daily living | (1) had an unstable medical condition that could lead to intensive care; (2) inability to communicate in French; (3) unable to consent; (4) history of a severe psychiatric condition (eg, schizophrenia, severe depression, or bipolar disorder); and (5) were living in a nursing home or another long-term care center | Prospective study                                                                                                                                      | O3DY-F (French) < 4                                | TICS-m score <27                                   | Sensitivity 76.2% (66.7%-84.8%), specificity 67.6% (61.0%-73.6%), PPV 46.7% (38.1%-55.4%), NPV 88.4% (82.6%-92.8%), positive LR 2.4, negative LR 0.4                                                                                                              |

|                                      |                                                                                                   |                                                                                                             |                                                                                                                                                                                                                                                                                                                                                                                                             |                                                    |                                                                          |                                                                                                |                                                                                                                                                                                                                                                                                                                                                                                                                                                             |
|--------------------------------------|---------------------------------------------------------------------------------------------------|-------------------------------------------------------------------------------------------------------------|-------------------------------------------------------------------------------------------------------------------------------------------------------------------------------------------------------------------------------------------------------------------------------------------------------------------------------------------------------------------------------------------------------------|----------------------------------------------------|--------------------------------------------------------------------------|------------------------------------------------------------------------------------------------|-------------------------------------------------------------------------------------------------------------------------------------------------------------------------------------------------------------------------------------------------------------------------------------------------------------------------------------------------------------------------------------------------------------------------------------------------------------|
| Carpenter, 2011, USA; ED             | N = 142; age $\geq 65$ y; mean age 77 y; 34% with cognitive impairment based on MMSE score $< 24$ | Consenting English-speaking patients aged $\geq 65$ y who had not received potentially sedating medications |                                                                                                                                                                                                                                                                                                                                                                                                             | Prospective, cross-sectional, convenience sampling | BAS, SBT, cAD8 stratified by whether MMSE was administered first or last | MMSE score $< 24$                                                                              | In order of total cohort, MMSE first, and MMSE last: BAS: sensitivity (%) 90, 91, 88; specificity (%) 43, 46, 41; positive LR 1.57, 1.67, 1.49; negative LR 0.24, 0.19, 0.30<br>SBT: sensitivity (%) 90, 86, 94; specificity (%) 47, 48, 48; positive LR 1.70, 1.65, 1.80; negative LR 0.22, 0.29, 0.12<br>cAD8: sensitivity (%) 83, 89, 78; specificity (%) 65, 68, 64; positive LR 2.37, 2.78, 2.18; negative LR 0.26, 0.16, 0.35                         |
| Carpenter, 2011, USA; ED;            | N = 142; age $\geq 65$ ; mean age 77; 34% with cognitive impairment based on MMSE score $< 24$    | Consenting English-speaking patients aged $\geq 65$ y who had not received potentially sedating medications |                                                                                                                                                                                                                                                                                                                                                                                                             | Prospective, cross-sectional, convenience sampling | BAS, SBT, cAD8 in detecting MCI                                          | Detection of MCI defined as normal MMSE score ( $\geq 24$ ) but abnormal MoCA score ( $< 26$ ) | BAS: sensitivity (%) 62 (57–66), specificity (%) 65 (44–82), positive LR 1.76 (1.01–3.62), negative LR 0.59 (0.42–0.99), AUC 0.742 (0.614–0.871)<br>cAD8: sensitivity (%) 40 (34–41), specificity (%) 89 (60–98), positive LR 3.56 (0.84–20.59), negative LR 0.68 (0.60–1.11), AUC 0.506 (0.345–0.666)<br>SBT: sensitivity (%) 63 (59–65), specificity (%) 63 (59–65), positive LR 5.39 (1.84–19.51), negative LR 0.41 (0.36–0.61), AUC 0.799 (0.692–0.906) |
| Han, 2018                            |                                                                                                   |                                                                                                             |                                                                                                                                                                                                                                                                                                                                                                                                             |                                                    |                                                                          |                                                                                                | Review of delirium and dementia, including the description of different tests used in detecting dementia in the ED                                                                                                                                                                                                                                                                                                                                          |
| Tong, 2016, Toronto, Ontario, Canada | N = 146; age $\geq 70$ y; mean age 80.6 (6.0) y                                                   | Participants who were aged $\geq 70$ y and who were present in the ED for a minimum of 4 h                  | Patients who were (1) critically ill (defined by the Canadian Triage Acuity Scale score of 1), (2) in acute pain (measured using the Numeric Rating Scale with a score $\geq 2$ of 10), (3) receiving psychoactive medications, (4) judged to have a psychiatric primary presenting complaint, (5) previously enrolled, (6) blind, or (7) unable to speak English, follow commands, or communicate verbally | Feasibility study, prospective enrollment          | Tablet-based serious game (whack-a-mole)                                 | MMSE, MoCA                                                                                     | Correlation of game response time (RT) and game accuracy: Game RT with MMSE score $-0.558$ , with MoCA $-0.339$<br>Game accuracy with MMSE score $-0.104$ (nonsignificant), with MoCA $-0.042$ (nonsignificant)                                                                                                                                                                                                                                             |

4AT, 4 A's Test; AFT, Animal Fluency Test; AMT, Abbreviated Mental Test; AUC, area under the curve; BAS, Brief Alzheimer's Screen; BRIGHT, Brief Risk Identification for Geriatric Health Tool; cAD8, caregiver-completed Alzheimer's Disease-8; CAM, Confusion Assessment Method; CLOX1, clock-drawing task; *DSM*, *Diagnostic Statistical Manual of Mental Disorders*; EMS, Emergency Medical Services; LR, likelihood ratio; MCI, mild cognitive impairment; Mini-Cog, mini cognitive; MMSE, Mini-Mental State Examination; MoCA, Montreal Cognitive Assessment; N/A, not applicable; NPV, negative predictive value; O3DY, Ottawa 3DY; OMCT, Orientation, Memory, Concentration Test; PMH, past medical history; PPV, positive predictive value; QCS, Quick Confusion Scale; RR, risk ratio; SBT, Short Blessed Test; 6-CIT, Six-Item Cognitive Impairment Test; SIS, Six-Item Screener; sMMSE, standardized MMSE; TICS-m, Telephone Interview for Cognitive Status—modified.

**Supplementary Table 2**

PICO 2 Abstraction Table

| Study, Location, Time Frame (* in PICO 1 and 2)                                          | No. of Patients (Median or Mean Age)              | Inclusion Criteria                                                                                                                                                                     | Exclusion Criteria                                                                                                                                                                     | Study Design- Timing of Recruitment                                                                                                       | Intervention: Screening Instrument or Tool Studied                                               | Measured for Feasibility, Pragmatic Nature, Timing, Efficiency, etc (Yes/No) | If Y: Measures Cited for Feasibility, Preferences, Duration of Instrument, Efficiency | If N: Points Made by Study About Ease of Use, Speed (Quick, Fast, etc), Setting, Integration Into Routine Care, etc                                                                                                                                                                                                                                                                                                                                                                                                                                                                                                                 |
|------------------------------------------------------------------------------------------|---------------------------------------------------|----------------------------------------------------------------------------------------------------------------------------------------------------------------------------------------|----------------------------------------------------------------------------------------------------------------------------------------------------------------------------------------|-------------------------------------------------------------------------------------------------------------------------------------------|--------------------------------------------------------------------------------------------------|------------------------------------------------------------------------------|---------------------------------------------------------------------------------------|-------------------------------------------------------------------------------------------------------------------------------------------------------------------------------------------------------------------------------------------------------------------------------------------------------------------------------------------------------------------------------------------------------------------------------------------------------------------------------------------------------------------------------------------------------------------------------------------------------------------------------------|
| Adler 2019, University Hospital SUNY Downstate (urban tertiary hospital)                 | No data for ED                                    | Birth year 1978 or earlier (40 y), use of upper extremities, lack of vision or hearing impairments, and English speaking                                                               | None                                                                                                                                                                                   | Pilot in ED: Patients in ED were triaged into "fast" and "slow" tracks depending on acuteness; patients in the slow track were approached | Computerized cognitive assessment tool used (the Cognigram)                                      | No                                                                           |                                                                                       | As per text description of study team experience: most adults declined participation, citing that they "had not been seen by a doctor" and "did not feel up to it." Another common reason for refusal was that they would soon be called and not have time to complete the Cognigram. Other observations in the ED included suspicion or nervousness about the Cognigram. Adults were not comfortable with the idea of cognitive testing, even when assured anonymity. They did not accept [the] purpose of evaluating Cognigram implementation, and mentioning that the Cognigram was used to study dementia or ADRD did not help" |
| Andrews 2009                                                                             |                                                   |                                                                                                                                                                                        |                                                                                                                                                                                        |                                                                                                                                           | 4-item screen: How old are you? What is your date of birth? What is this place? What year is it? |                                                                              |                                                                                       | Brevity of the test likely to be practical as per the report.                                                                                                                                                                                                                                                                                                                                                                                                                                                                                                                                                                       |
| Bedard 2017*, between February and May 2016 in 4 hospitals across the province of Québec | N = 305, age mean 76 y (SD 10.8)                  | Patients aged ≥65 y, with an 8-h ED stay, admitted on a care unit, independent or semiindependent in their ADL                                                                         | Patient living in a long-term nursing facility, with an unstable medical condition, preexisting psychiatric condition or severe dementia, a delirium within the 8-h exposure to the ED | Comparison against reference tests                                                                                                        | Administration of O3DY                                                                           | No                                                                           |                                                                                       | None                                                                                                                                                                                                                                                                                                                                                                                                                                                                                                                                                                                                                                |
| Bissig 2019*, University of California–Davis Neurology consultation service              | N = 100; age 68 y (SD 12); 5 with dementia, 1 MCI | Patient living in a long-term nursing facility, with an unstable medical condition, preexisting psychiatric condition or severe dementia, a delirium within the 8-h exposure to the ED | None                                                                                                                                                                                   | Integrating screener into ED neurology consultations; administered within 24 h of hospital arrival                                        | SIS                                                                                              | No                                                                           |                                                                                       | None                                                                                                                                                                                                                                                                                                                                                                                                                                                                                                                                                                                                                                |

|                                                                                                                                                      |                                                      |                                                                                                                                                                                                                                                                                                                                                                          |                                                                                                                                                                                      |                                                                                                                                                                                                                                  |                                                                                                                                                                                                                                                                                                                                                                                                                   |     |                                                                                                                                                                                                                                                                                                                                            |                                                                                                                                                                                                                                                                                                                  |
|------------------------------------------------------------------------------------------------------------------------------------------------------|------------------------------------------------------|--------------------------------------------------------------------------------------------------------------------------------------------------------------------------------------------------------------------------------------------------------------------------------------------------------------------------------------------------------------------------|--------------------------------------------------------------------------------------------------------------------------------------------------------------------------------------|----------------------------------------------------------------------------------------------------------------------------------------------------------------------------------------------------------------------------------|-------------------------------------------------------------------------------------------------------------------------------------------------------------------------------------------------------------------------------------------------------------------------------------------------------------------------------------------------------------------------------------------------------------------|-----|--------------------------------------------------------------------------------------------------------------------------------------------------------------------------------------------------------------------------------------------------------------------------------------------------------------------------------------------|------------------------------------------------------------------------------------------------------------------------------------------------------------------------------------------------------------------------------------------------------------------------------------------------------------------|
| Blomaard 2021,<br>Leiden University<br>Medical Center,<br>tertiary hospital<br>in the<br>Netherlands; 4<br>December 2017<br>until 2 February<br>2018 | N = 953; age 77 y<br>(IQR 73-82)                     | All patients aged $\geq 70$ y<br>are eligible for<br>screening after<br>routine ED triage                                                                                                                                                                                                                                                                                | Excluded patients who<br>bypassed triage and<br>patients who were<br>triaged to the<br>immediate urgency<br>level                                                                    | Before and after<br>implementation of<br>screening program:<br>Implementation:<br>recurring PDSA cycles for<br>implementation,<br>facilitation of program in<br>electronic health record<br>and standard operating<br>procedures | APOP screener (which<br>includes 3 questions<br>on dementia and<br>cognition) followed<br>by interventions:<br>screening older<br>patients for risk of<br>functional decline or<br>mortality and signs of<br>impaired cognition;<br>second, targeted<br>interventions for<br>high-risk patients in<br>the ED; and third,<br>interventions for<br>high-risk patients<br>who are hospitalized<br>or discharged home | Yes | Comparison of ED LOS<br>before and after<br>implementation of<br>screener: ED LOS<br>202 min (IQR 133-<br>290 min) before vs<br>196 min (IQR 133-<br>265 min) after; $P =$<br>.152; hospital<br>admission rate 40%<br>before and 39% after;<br>$P = .642$                                                                                  |                                                                                                                                                                                                                                                                                                                  |
| Boucher 2019,<br>Hôpital de<br>l'Enfant-Jésus<br>(CHU de Québec<br>—Université<br>Laval) between<br>May and July<br>2018                             | N = 67; age 75.5 $\pm$<br>8 y; mild<br>dementia 7/67 | Patients aged $\geq 65$ y<br>presenting to the ED<br>of the Hôpital de<br>l'Enfant-Jésus (CHU<br>de Québec<br>—Université Laval) for<br>any medical reason;<br>caregiver, relative, or<br>close friend of a study<br>participant who was<br>present at the time of<br>enrolment                                                                                          | Required resuscitation<br>(CTAS 1); were unable<br>to speak French; were<br>unable to consent;<br>had a physical<br>condition preventing<br>them from using the<br>electronic tablet | RCT with crossover<br>comparing tablet<br>assessment vs RA<br>assessment                                                                                                                                                         | Functional, frailty and<br>cognitive assessment<br>using electronic<br>tablet; compared to<br>RA collected O3DY,<br>MoCA, OARS, CFS                                                                                                                                                                                                                                                                               | Yes | Patient-reported<br>acceptability measure:<br>TAP questionnaire;<br>mean adjusted TAP<br>scores showed no<br>difference: 2.36 for<br>standard RA<br>assessments vs 2.20 for<br>self-assessment using a<br>tablet ( $P = .08$ );<br>subgroup analysis with<br>age > 85 y showed<br>worse acceptability for<br>tablet or self-<br>assessment | Additional open-ended<br>questions: that assess<br>acceptability and preference<br>of the 2 modes of<br>assessments; comments<br>include liked being able to<br>concentrate and take their<br>time answering the questions<br>on the tablet; the main reason<br>for refusal was fear or dislike<br>of technology |
| Boyd 2008*, New<br>Zealand ED in<br>Auckland; a 12-<br>wk period<br>between<br>December 2005<br>and March 2006                                       | N = 139; age 82.5<br>( $\pm 5.4$ ) y                 | Aged $\geq 75$ y (65 y for<br>Maori and Pasifika<br>elders) who<br>presented to the ED<br>with a nonurgent<br>complaint (triage<br>level 3-5) during a<br>convenience sample<br>of 4-h time blocks<br>(Monday–Friday, 8<br>AM–8 PM) during the<br>study period;<br>cognitively impaired<br>patient only enrolled<br>if family was available<br>to complete<br>assessment |                                                                                                                                                                                      | Cross-sectional study                                                                                                                                                                                                            | Comparison of 11-item<br>BRIGHT case-finding<br>tool administered in<br>ED against<br>comprehensive<br>geriatric assessment<br>within 10 d                                                                                                                                                                                                                                                                        | No  |                                                                                                                                                                                                                                                                                                                                            | 75% of participants had<br>assistance from a visitor or<br>the RA to complete the<br>BRIGHT assessment                                                                                                                                                                                                           |
| Calf 2021*,<br>Systematic<br>review of<br>cognitive<br>screening<br>instruments in ED                                                                |                                                      |                                                                                                                                                                                                                                                                                                                                                                          |                                                                                                                                                                                      | Systematic review of<br>diagnostic accuracy of<br>instruments                                                                                                                                                                    |                                                                                                                                                                                                                                                                                                                                                                                                                   | No  |                                                                                                                                                                                                                                                                                                                                            |                                                                                                                                                                                                                                                                                                                  |

(continued on next page)

Supplementary Table 2 (continued)

| Study, Location, Time Frame (* in PICO 1 and 2)                                                                                               | No. of Patients (Median or Mean Age)            | Inclusion Criteria                                                                                              | Exclusion Criteria                                                                                                                                                                                                                                                                        | Study Design- Timing of Recruitment        | Intervention: Screening Instrument or Tool Studied                                                                                                                                                  | Measured for Feasibility, Pragmatic Nature, Timing, Efficiency, etc (Yes/No) | If Y: Measures Cited for Feasibility, Preferences, Duration of Instrument, Efficiency                                                                                                                                                                                                                               | If N: Points Made by Study About Ease of Use, Speed (Quick, Fast, etc), Setting, Integration Into Routine Care, etc                |
|-----------------------------------------------------------------------------------------------------------------------------------------------|-------------------------------------------------|-----------------------------------------------------------------------------------------------------------------|-------------------------------------------------------------------------------------------------------------------------------------------------------------------------------------------------------------------------------------------------------------------------------------------|--------------------------------------------|-----------------------------------------------------------------------------------------------------------------------------------------------------------------------------------------------------|------------------------------------------------------------------------------|---------------------------------------------------------------------------------------------------------------------------------------------------------------------------------------------------------------------------------------------------------------------------------------------------------------------|------------------------------------------------------------------------------------------------------------------------------------|
| Carpenter 2011, level 1 trauma center ED; July 2008–February 2009                                                                             | 21 physicians and 34 nurses (response rate 42%) | Physicians and nurses at a level 1 trauma ED                                                                    | None                                                                                                                                                                                                                                                                                      | Cross-sectional survey of staff            | 8-item survey on ED management of geriatric patients; for the previous 8 mo, older adults were screened by a geriatric technician for cognitive dysfunction (MMSE), falls and function (OARS scale) | Yes                                                                          | 8-item survey regarding geriatric technician role (acceptability and feasibility); 71% of physicians and 85% of nurses found geriatric technician screening as an overall benefit to older patients; 0% of physicians and 18% of nurses thought that geriatric technician screening prolonged the ED length of stay |                                                                                                                                    |
| Carpenter 2008*, systematic review abstract concerning the practicality and accuracy of brief cognitive screening instruments in primary care |                                                 | Studies enrolling subjects older than 60 y and which used an acceptable criterion standard to diagnose dementia | Non–English language articles, inpatient or nursing home isolated populations, memory disorder clinic populations without an adequately characterized outside control group, or populations with less than 6 y of median education                                                        | Systematic review                          |                                                                                                                                                                                                     | Yes                                                                          | Time needed to administer; reproduction limited to copyright                                                                                                                                                                                                                                                        |                                                                                                                                    |
| Carpenter 2011*, tertiary medical center ED; from July 1, 2008, to April 20, 2009                                                             | N = 371; mean age 76 y                          | All ED patients aged ≥65 y                                                                                      | Patients who received medications that may have affected their mental status; too critically ill to participate, as judged by the attending emergency physician, were unable to consent or cooperate with data acquisition, did not speak English, or refused to complete the questioning | Observational cross-sectional cohort study | SIS, AD8, and MMSE                                                                                                                                                                                  | No                                                                           |                                                                                                                                                                                                                                                                                                                     | Using both instruments requires more time and training, with the additional need to find consenting caregivers to complete the AD8 |

|                                                                                                                             |                                                                                 |                                                   |                                                                                                                                                                                                                                                                                                                                                                                                                                       |                                                           |                                                                                                         |     |                                                                                                                                                                                                                                                                                       |
|-----------------------------------------------------------------------------------------------------------------------------|---------------------------------------------------------------------------------|---------------------------------------------------|---------------------------------------------------------------------------------------------------------------------------------------------------------------------------------------------------------------------------------------------------------------------------------------------------------------------------------------------------------------------------------------------------------------------------------------|-----------------------------------------------------------|---------------------------------------------------------------------------------------------------------|-----|---------------------------------------------------------------------------------------------------------------------------------------------------------------------------------------------------------------------------------------------------------------------------------------|
| Carpenter 2011*,<br>urban academic<br>university<br>–affiliated<br>medical center<br>between June<br>2009 and March<br>2010 | N = 169; age = 78<br>± 8 y                                                      | All ED patients aged<br>≥65 y                     | Patients receiving<br>mental status<br>–altering<br>medications<br>(antiemetics,<br>benzodiazepines, or<br>narcotics) prior to or<br>during the testing<br>period, emergency<br>physician judgment<br>of critical illness<br>precluding informed<br>consent or safe data<br>collection, subject<br>inability to consent or<br>comply with data<br>acquisition, non<br>–English speaking, or<br>refusal to complete<br>the questioning | Prospective, cross-<br>sectional, convenience<br>sampling | O3DY, BAS, SBT, cAD8<br>compared against<br>MMSE                                                        | No  |                                                                                                                                                                                                                                                                                       |
| Clevenger 2012,<br>systematic<br>review or scoping<br>review?                                                               | Includes 209<br>articles<br>pertaining to care<br>for PWD in ED                 |                                                   |                                                                                                                                                                                                                                                                                                                                                                                                                                       | Systematic review or<br>scoping review??                  | Clinical care for PWD in<br>ED (includes<br>assessment)                                                 | No  |                                                                                                                                                                                                                                                                                       |
| de Gelder 2018, EDs<br>in 4 hospitals in<br>the Netherlands;<br>from 2014 to<br>2017                                        | N = 2629; mean<br>age 79 y (IQR 74-<br>84); 20.5% with<br>impaired<br>cognition | All patients aged ≥70 y                           | Red triage category<br>(highest acuity)<br>according to the<br>Manchester Triage<br>System (MTS), an<br>unstable medical<br>condition, no<br>permission of nurse<br>or physician to<br>approach the patient,<br>a language barrier<br>and impossibility to<br>obtain informed<br>consent                                                                                                                                              | Multicenter cohort study                                  | APOP screener (which<br>includes 3 questions<br>on dementia/<br>cognition)                              | Yes | Mean time to complete<br>the screener was 93 s<br>(SD 29); overall rating<br>of clinical usability was<br>positive, with a mean<br>Likert score of 3.79 (out<br>of 5; SD 0.63)                                                                                                        |
| Dyer 2017, Irish<br>tertiary urban<br>referral<br>university<br>teaching hospital;<br>June-August 2014                      | N = 220; 78.8<br>(±6.16) y                                                      | Patients aged ≥70 y<br>who presented to the<br>ED | Patients who were too<br>unwell to take part<br>were excluded, as<br>were patients who<br>refused assessment.                                                                                                                                                                                                                                                                                                                         | Convenience sample; cross-<br>sectional                   | Informant history;<br>cognitive screeners<br>for delirium (CAM-<br>ICU) and dementia<br>(sMMSE and AD8) | Yes | The length of time to<br>contact informants was<br>3.1 (±5.8) min. In 9.1%<br>(6/66), it took 10 min or<br>longer to contact the<br>informant; brief<br>informant interviewing<br>(mean duration, 6 min);<br>rating of privacy (8.4 ±<br>1.6/10) and accessibility<br>(8.5 ± 1.47/10) |

(continued on next page)

Supplementary Table 2 (continued)

| Study, Location, Time Frame (* in PICO 1 and 2)                               | No. of Patients (Median or Mean Age)                                  | Inclusion Criteria                                                                                                                                                                                                                    | Exclusion Criteria                                                                                                                                                                                                                                                                                                   | Study Design- Timing of Recruitment                           | Intervention: Screening Instrument or Tool Studied        | Measured for Feasibility, Pragmatic Nature, Timing, Efficiency, etc (Yes/No) | If Y: Measures Cited for Feasibility, Preferences, Duration of Instrument, Efficiency                                                                                                                                                                                                           | If N: Points Made by Study About Ease of Use, Speed (Quick, Fast, etc), Setting, Integration Into Routine Care, etc |
|-------------------------------------------------------------------------------|-----------------------------------------------------------------------|---------------------------------------------------------------------------------------------------------------------------------------------------------------------------------------------------------------------------------------|----------------------------------------------------------------------------------------------------------------------------------------------------------------------------------------------------------------------------------------------------------------------------------------------------------------------|---------------------------------------------------------------|-----------------------------------------------------------|------------------------------------------------------------------------------|-------------------------------------------------------------------------------------------------------------------------------------------------------------------------------------------------------------------------------------------------------------------------------------------------|---------------------------------------------------------------------------------------------------------------------|
| Dziedzic 1998*, academic ED of a university-based hospital                    | N = 31                                                                | Age ≥65 y, absence of recent head or multisystem trauma; able to speak English as a primary language; not be acutely experiencing alcohol or substance intoxication; score of 15 on the GCS; and educational level equivalent to ≥9 y |                                                                                                                                                                                                                                                                                                                      | Cross-sectional                                               | MMSE compared against constructed interview for physician | No                                                                           |                                                                                                                                                                                                                                                                                                 |                                                                                                                     |
| Eagles 2020*, academic tertiary care hospital ED between June and August 2013 | N = 260; mean age 83.7 y (SD 5.9)                                     | Age ≥75 y                                                                                                                                                                                                                             | A known history of cognitive impairment or were obviously cognitively impaired; were non-English or French speaking patients; had auditory, verbal, or visual impairments severe enough to affect cognitive testing; were critically ill; resided in a long-term care home or were transferred from other hospitals. | Prospective cohort                                            | O3DY                                                      | Yes                                                                          | Postimplementation survey of nurses and physicians: 98%, 95%, and 88% of physician respondents judged the O3DY tool to be easy to learn, to use, and to remember, respectively; 97% agreeing that the O3DY tool is easy to learn and use and 94% reporting that it is easy to remember (nurses) |                                                                                                                     |
| Eagles 2014, a tertiary-care ED                                               | N = 198; mean age 84.2 y; 31% with evidence of impaired mental status | ≥75 y of age                                                                                                                                                                                                                          |                                                                                                                                                                                                                                                                                                                      | Prospective cohort                                            | O3DY                                                      | No                                                                           |                                                                                                                                                                                                                                                                                                 | Mentioned that it is a feasible tool for ED                                                                         |
| Fox 2018, ED (not specified)                                                  | N = 785; 81.4 (SD 6.4) y; 9% with dementia diagnosis                  | Aged ≥70 y                                                                                                                                                                                                                            |                                                                                                                                                                                                                                                                                                                      | Prospective randomized double-blind diagnostic accuracy study | 4AT                                                       | No                                                                           |                                                                                                                                                                                                                                                                                                 | Rapid delirium assessment instrument, feasible in routine care                                                      |
| Gerson 1994*, midwestern community teaching hospital; March-May 1992          | N = 547; mean age 76.7 y (7.7 SD)                                     | Age ≥65 y treated in the ED                                                                                                                                                                                                           | Refused to participate, physical condition prevented participation, had known dementia, unable to communicate in English                                                                                                                                                                                             | Cross-sectional study                                         | Six-item OMCT                                             | Yes                                                                          | Mean time of 1.9 min (+0.91 SD) was required to complete the test                                                                                                                                                                                                                               |                                                                                                                     |
| Graf 2010, Letter to the editor; commentary, and evidence synthesis           |                                                                       |                                                                                                                                                                                                                                       |                                                                                                                                                                                                                                                                                                                      | Evidence synthesis                                            | QCS described for cognition assessment                    |                                                                              |                                                                                                                                                                                                                                                                                                 | QCS, which can be completed more quickly (~2 min) than the MMSE                                                     |

|                                                                                                                    |                                            |                                                                                                          |                                                                                                                                                                                                                                                                                                                               |                                     |                                                                                    |                                                                                                                                                                                                                                   |                                                                                                                                                                                                                     |
|--------------------------------------------------------------------------------------------------------------------|--------------------------------------------|----------------------------------------------------------------------------------------------------------|-------------------------------------------------------------------------------------------------------------------------------------------------------------------------------------------------------------------------------------------------------------------------------------------------------------------------------|-------------------------------------|------------------------------------------------------------------------------------|-----------------------------------------------------------------------------------------------------------------------------------------------------------------------------------------------------------------------------------|---------------------------------------------------------------------------------------------------------------------------------------------------------------------------------------------------------------------|
| Graf, 2012                                                                                                         |                                            |                                                                                                          |                                                                                                                                                                                                                                                                                                                               |                                     | No                                                                                 | In ED, screening tools developed to detect these geriatric problems have to be quick, easy to use, and to present a high sensibility.                                                                                             |                                                                                                                                                                                                                     |
| Groening, 2020                                                                                                     |                                            |                                                                                                          |                                                                                                                                                                                                                                                                                                                               |                                     | No                                                                                 | Though some emergency physician might consider “the old patient” as not exciting, there is a broad consensus that pragmatic geriatric screening tools are required. More practical tools will have to be developed in the future. |                                                                                                                                                                                                                     |
| Hadbavna 2013, in ED between October 15, 2012, and October 30, 2012                                                | N = 117; mean age 76.4 (±8) y              | Aged ≥65 y                                                                                               |                                                                                                                                                                                                                                                                                                                               | Convenience sample; cross-sectional | Nurse-administered 6-CIT                                                           | No                                                                                                                                                                                                                                | Noted considerable variation in applicability and successful implementation of the screening instrument between nurses despite training                                                                             |
| Han 2018                                                                                                           |                                            |                                                                                                          |                                                                                                                                                                                                                                                                                                                               |                                     | Table listing screening tests (p. 344 Table 5); AD8, BAS, Mini-Cog, O3DY, SIS, SBT |                                                                                                                                                                                                                                   | Mentioned time required for certain tests (Mini-Cog, 10 min; SBT, <5 min; O3DY, <2 min)                                                                                                                             |
| Hare 2008, ED in hospital in Western Australia; April 2007                                                         | N = 28; mean age 79.2 y; 18% with dementia | Aged ≥65 y                                                                                               | Did not speak English, unable to speak because of medical condition, critically ill at the time                                                                                                                                                                                                                               | Quality improvement                 | AMT, CAM                                                                           | No                                                                                                                                                                                                                                | AMT takes up to 5 min to administer                                                                                                                                                                                 |
| Hirschman 2011*, ED of a large, urban, tertiary academic health center; between September 6, 2007, and May 1, 2008 | N = 829; age 75.7 ± 7.1 y                  | Age ≥65 y, lived within a 30-mile radius of the ED in the state of Pennsylvania, and lived independently | Had an end-stage disease with prognosis of 6 mo or less, cancer diagnosis with active treatment, known alcohol or drug abuse, history of neurologic disease (eg, cerebral vascular accident with residual effects, multiple sclerosis, etc), a previous medical history of dementia or delirium, or resided in a nursing home |                                     | 2 validated screening tools: the SIS and CLOX1                                     | No                                                                                                                                                                                                                                | Study measures and analyses controlled for no ED-specific environmental variables (eg, crowding, time of triage, triage class, location of screening, wait time, etc) in relation to screening cognitive impairment |

(continued on next page)



Supplementary Table 2 (continued)

| Study, Location, Time Frame (* in PICO 1 and 2)         | No. of Patients (Median or Mean Age)                                                | Inclusion Criteria                                                                                    | Exclusion Criteria                                                                                                                                                                                                                                                                                                                                                                             | Study Design- Timing of Recruitment | Intervention: Screening Instrument or Tool Studied                                                                                                        | Measured for Feasibility, Pragmatic Nature, Timing, Efficiency, etc (Yes/No) | If Y: Measures Cited for Feasibility, Preferences, Duration of Instrument, Efficiency               | If N: Points Made by Study About Ease of Use, Speed (Quick, Fast, etc), Setting, Integration Into Routine Care, etc                                                                                                                                   |
|---------------------------------------------------------|-------------------------------------------------------------------------------------|-------------------------------------------------------------------------------------------------------|------------------------------------------------------------------------------------------------------------------------------------------------------------------------------------------------------------------------------------------------------------------------------------------------------------------------------------------------------------------------------------------------|-------------------------------------|-----------------------------------------------------------------------------------------------------------------------------------------------------------|------------------------------------------------------------------------------|-----------------------------------------------------------------------------------------------------|-------------------------------------------------------------------------------------------------------------------------------------------------------------------------------------------------------------------------------------------------------|
| Huff 2001*, University hospital ED                      | N = 205                                                                             | Aged 55 y or older                                                                                    | Head trauma or multisystem trauma, inability to speak English, educational level of $\leq 7$ y, acute medical illness, or contact or droplet isolation. Additionally, patients that the research assistants felt might be harmed by mental distress or other discomfort by test administration were excluded                                                                                   | Cross-sectional, convenience sample | Comparison of QCS against MMSE                                                                                                                            | Yes                                                                          | MMSE took significantly longer to administer (311 s mean) than did the QCS (141 s mean; $P < .01$ ) |                                                                                                                                                                                                                                                       |
| Irons 2002, University hospital ED; June-August 2000    | N = 731; age 18-25 y (16%); 26-40 y (30%); 41-60 y (30%); 61-75 y (13%); >75 y (8%) | Age $\geq 18$ y                                                                                       | Sustained multisystem trauma resulting in GCS score $< 15$ , unable to speak English, required acute medical intervention, require contact or respiratory isolation, patients who RA thought might experience emotional distress or other discomfort, chronic cognitive deficits (previously diagnosed as having moderate to severe mental retardation, Down syndrome, advanced dementia, etc) | Prospective, cross-sectional        | Validation of QCS against MMSE                                                                                                                            | No                                                                           |                                                                                                     | Average administration and scoring time for the QCS is slightly less than 2½ min; QCS requires no written response from the patient                                                                                                                   |
| Keles 2001                                              |                                                                                     |                                                                                                       |                                                                                                                                                                                                                                                                                                                                                                                                |                                     |                                                                                                                                                           | No                                                                           |                                                                                                     | Standardized tests applied briefly and easily are available and these are beneficial in order to identify and treat cognitive disorders of older adults                                                                                               |
| Kennelly 2012, ED in urban teaching hospital in Ireland | N = 76                                                                              | All medical, surgical, and ED physicians involved in the acute care of older patients in the hospital |                                                                                                                                                                                                                                                                                                                                                                                                | Cross-sectional                     | 14-item questionnaire administered to assess knowledge skills and attitudes of physicians toward screening of older patients in ED for cognitive deficits | Yes                                                                          | 29% felt they lacked expertise to perform screening; 78% thought screening was important            | Clinicians reported several limiting factors that restricted their efforts to do this: lack of a rapid screening tool; lack of privacy; too much noise; and time constraints. There was no consensus on who should perform screening in this setting. |

Kennelly 2013, urban teaching hospital, ED, January-March 2012  
 Koita 2010

All medical, surgical, and ED physicians, 76 of 97 completed survey  
 N/A

N/A

N/A

Article discusses the process for conducting a mental status examination on a patient in the ED. It mentions SIS, clock drawing, Mini-Cog, Memory Impairment Screen, Brief Alzheimer Screen, 7-min screen, and MMSE as tests for neurologic mental status examinations

No

N/A

The 7-10 min needed to perform the MMSE and the copyright laws pose further barriers for easy ED use. The 1996 US Preventative Services Task Force literature review found the MMSE, Short Test of Mental Status, the Blessed Orientation Memory Concentration Test, and Functional Activities Questionnaire were all equivalent as a screening tool for detecting dementia. These cognitive tests have not been studied in the ED setting, however, and do not have a defined role in the ED at this time. Wilber and colleagues performed a study in the ED setting comparing the MMSE, SIS, and Mini-Cog. The Mini-Cog consists of 3-item recall and clock drawing; SIS consists of 3-item recall and 3-item temporal orientation (ie, day of week, month, and year). When using a cutoff score of  $\leq 4$  in SIS, the SIS proved to be better than the Mini-Cog. In comparison to the MMSE, the SIS had a sensitivity and specificity of 94% and 86%, respectively, whereas the Mini-Cog had a sensitivity and specificity of 75% and 85%, respectively. Initially, Callahan and colleagues found SIS to perform as well as MMSE, but repeat studies have shown that SIS only had a sensitivity of 63% and specificity of 81%. Cognitive assessment in the ED continues to be an area in need of research.

*(continued on next page)*

**Supplementary Table 2** (continued)

| Study, Location, Time Frame (* in PICO 1 and 2) | No. of Patients (Median or Mean Age)        | Inclusion Criteria                                                                                                                                                       | Exclusion Criteria                                                                                                                                                                                                                                                                                                                              | Study Design- Timing of Recruitment                                                                                                                                                                                                                                                                                                                       | Intervention: Screening Instrument or Tool Studied                                                                                                                                                                                                                                                                                                    | Measured for Feasibility, Pragmatic Nature, Timing, Efficiency, etc (Yes/No) | If Y: Measures Cited for Feasibility, Preferences, Duration of Instrument, Efficiency                                                                                                                                                  | If N: Points Made by Study About Ease of Use, Speed (Quick, Fast, etc), Setting, Integration Into Routine Care, etc                                                                                                                                                                                                                                                             |
|-------------------------------------------------|---------------------------------------------|--------------------------------------------------------------------------------------------------------------------------------------------------------------------------|-------------------------------------------------------------------------------------------------------------------------------------------------------------------------------------------------------------------------------------------------------------------------------------------------------------------------------------------------|-----------------------------------------------------------------------------------------------------------------------------------------------------------------------------------------------------------------------------------------------------------------------------------------------------------------------------------------------------------|-------------------------------------------------------------------------------------------------------------------------------------------------------------------------------------------------------------------------------------------------------------------------------------------------------------------------------------------------------|------------------------------------------------------------------------------|----------------------------------------------------------------------------------------------------------------------------------------------------------------------------------------------------------------------------------------|---------------------------------------------------------------------------------------------------------------------------------------------------------------------------------------------------------------------------------------------------------------------------------------------------------------------------------------------------------------------------------|
| Krupp 2018, Germany; acute geriatric department | N = 165                                     |                                                                                                                                                                          |                                                                                                                                                                                                                                                                                                                                                 | Patients in an acute geriatric department performed the SIS (4 times), the MMSE (2 times), CDT according to Shulman (2 times), the Regensburg verbal fluency test (2 times), and the Montgomery-Åsberg depression rating scale within a period of 16 d. The overall judgment of a physician blinded to the test results served as the reference standard. | SIS, MMSE, clock drawing, Regensburg verbal fluency, Montgomery-Asberg depression scale                                                                                                                                                                                                                                                               | No                                                                           |                                                                                                                                                                                                                                        | The SIS closely correlated with the medical judgment (-0.729). The SIS is a valid, reliable short cognitive test. Using a threshold of 5 points, the SIS detects cognitive deficits relevant to daily living with a higher sensitivity than the MMSE with a threshold of 25. The brevity and simple application of the SIS also enable its application outside geriatric wards. |
| Lague 2018*, Canada; ED; March-July 2015        | N = 171; age ≥ 65 y; 76.9 y (SD 8.3); 2%; 0 | Age ≥65 y, independent or semiindependent (can perform 5 of the 7 activities of daily living without any help), spent ≥8 h in the ED, were admitted to any hospital ward | Were living in a long-term care facility, were unable to consent, were unable to communicate in French or English, were experiencing an unstable medical condition leading to their admission to the intensive care unit, had a previous diagnosis of severe dementia or any other psychiatric condition, had delirium during their 8-h ED stay | Participants recruited after being in the ED for at least 8 h                                                                                                                                                                                                                                                                                             | Bergman-Paris Question (BPQ). Asked of patient's close relative "Would you be comfortable leaving your family member home alone for three months if you had to go on a trip to Paris and no other family member or close friend was available?" The purpose of the study was help assess if further geriatric assessments were needed of the patient. | Yes                                                                          | The BPQ had good sensitivity but a low specificity for detecting the 3 geriatric syndromes, cognitive impairment, functional impairment, and frailty. The BPQ could be used to flag patients who would benefit from further screening. |                                                                                                                                                                                                                                                                                                                                                                                 |

|                                                                                                     |                            |                                                          |                       |                                                                                                                                                                                                                                    |                                                                                                                                                                                                                                   |    |                                                                                                                                                                                                                                                                                                                                                                                                                                                                                                                                                                                                                                                                                    |
|-----------------------------------------------------------------------------------------------------|----------------------------|----------------------------------------------------------|-----------------------|------------------------------------------------------------------------------------------------------------------------------------------------------------------------------------------------------------------------------------|-----------------------------------------------------------------------------------------------------------------------------------------------------------------------------------------------------------------------------------|----|------------------------------------------------------------------------------------------------------------------------------------------------------------------------------------------------------------------------------------------------------------------------------------------------------------------------------------------------------------------------------------------------------------------------------------------------------------------------------------------------------------------------------------------------------------------------------------------------------------------------------------------------------------------------------------|
| Laguna 1997, ED                                                                                     | N = 536; age $\geq$ 60 y   | Patients aged $\geq$ 60 y seen in ED                     | No exclusion criteria |                                                                                                                                                                                                                                    | To check the reliability of the usual medical assessment to detect the cognitive deterioration in older adults attended at HED, compared with that performed systematically by means of an evaluation test of cognitive functions | No | Cognitive deterioration was not detected in 111 patients (31.5%); it was mild in 147 (41.8%), moderate in 71 (20.2%), and severe in 23 (6.5%). In patients with moderate-severe deterioration according to the OMCT, such a deterioration was detected by the usual medical evaluation in 7% of cases. The mean time in completing the test was $2.6 \pm 0.9$ min. An age $\geq$ 80 y was associated with an increased relative risk for detecting moderate-severe cognitive deterioration (1.98; 95% CI, 1.42-2.78; $P < .001$ ), whereas the discharge diagnosis of respiratory disease was associated with a decrease of the relative risk (0.41, 95% CI 0.19-0.89; $P < .05$ ) |
| Lanata 2014, Rhode Island Hospital                                                                  | N = 23 resident physicians | For chart review: admitted to medicine or neurology ward |                       | Authors reviewed charts for 100 adult patients admitted to medicine and neurology wards; 23 resident physicians were questioned about their use of cognitive screening tools.                                                      |                                                                                                                                                                                                                                   | No | Authors found 67% and 63% of patients evaluated by attendings in the emergency and medicine departments, respectively, did not receive any form of cognitive testing. In addition, 62% of patients evaluated by neurology attendings received cognitive testing. No physician performed hierarchical, systematic mental status examinations. The most common reason cited by resident physicians for not using standardized cognitive screening tools was lack of time.                                                                                                                                                                                                            |
| Lucke 2017, Leiden University MedicalCenter (LUMC) and Alrijne Hospital in the Netherlands; ED; N/R | N = 1632; age $\geq$ 70 y  | Patients aged $\geq$ 70 y visiting ED                    | N/R                   | The aim was to investigate if the 6-CIT is an independent predictor of functional decline and mortality. They compared the 6-CIT score with the Katz ADL and assessed mortality and functional decline 3 mo and 1 y post-ED visit. | 6-CIT, Katz ADL                                                                                                                                                                                                                   | No | Cognitive impairment, measured with the 2-3-min 6-CIT, is independently associated with adverse health outcomes in older ED patients.                                                                                                                                                                                                                                                                                                                                                                                                                                                                                                                                              |

(continued on next page)

Supplementary Table 2 (continued)

| Study, Location, Time Frame (* in PICO 1 and 2)                                                      | No. of Patients (Median or Mean Age) | Inclusion Criteria                                    | Exclusion Criteria | Study Design- Timing of Recruitment                                                                                                                                                                                                                                                                                                                                    | Intervention: Screening Instrument or Tool Studied | Measured for Feasibility, Pragmatic Nature, Timing, Efficiency, etc (Yes/No) | If Y: Measures Cited for Feasibility, Preferences, Duration of Instrument, Efficiency | If N: Points Made by Study About Ease of Use, Speed (Quick, Fast, etc), Setting, Integration Into Routine Care, etc                                                                                                                                                                                                                                                                                       |
|------------------------------------------------------------------------------------------------------|--------------------------------------|-------------------------------------------------------|--------------------|------------------------------------------------------------------------------------------------------------------------------------------------------------------------------------------------------------------------------------------------------------------------------------------------------------------------------------------------------------------------|----------------------------------------------------|------------------------------------------------------------------------------|---------------------------------------------------------------------------------------|-----------------------------------------------------------------------------------------------------------------------------------------------------------------------------------------------------------------------------------------------------------------------------------------------------------------------------------------------------------------------------------------------------------|
| Lucke 2015, Leiden University Medical Center (LUMC) and Alrijne Hospital in the Netherlands; ED; N/R | N = 757; age ≥ 70 y; 78.7 y mean     | Patients aged ≥70 y visiting ED                       |                    | A prospective follow-up study among all patients aged ≥70 y presenting to the ED of a university teaching hospital in the Netherlands. Descriptive data including cognition, measured by the 6-CIT was obtained. Follow-up data consisted of 90-d mortality and 90-d functional decline, defined by 1-point increase in Katz ADL score and/or new institutionalization | 6-CIT, Katz ADL                                    | No                                                                           |                                                                                       | 6-CIT is administered in 2-3 min and measures cognitive impairment. Impaired cognition (6-CIT score > 9) was significantly associated with both mortality (OR 3.51, 95% CI 1.96-6.27, P value < .001) and functional decline (OR 1.75, 95% CI 1.08-2.82, P value .023) after adjustment for age, gender, level of education, dementia, number of different medications used at home, and time of arrival. |
| Maxwell 2013, 2 acute care community hospitals                                                       | N = 80; 78.7 y mean; 44%; 27         | Patients aged ≥65 y visiting ED with a primary injury |                    | The Mini-Cog or Informant Questionnaire on Cognitive Decline in the Elderly (IQCDE) and Vulnerable Elder Survey (VES-13) were administered to patients or surrogates.                                                                                                                                                                                                  |                                                    |                                                                              |                                                                                       | Cognitive impairment was present in 36 (44%) of patients (abnormal Mini-Cog: 22%; IQCDE > 3.44: 22%). Injured older adults had higher cognitive and preinjury functional impairment than has been reported in other older populations. A combination of brief screening instruments for use with hospitalized injured older adults or surrogates is useful for risk assessment and clinical management.   |
| Melady 2018                                                                                          | N/A                                  | N/A                                                   | N/A                | Not a study                                                                                                                                                                                                                                                                                                                                                            |                                                    |                                                                              |                                                                                       | This article discusses best practices in the ED for care of geriatric patients. Mentions screening for cognitive defects and mentions O3DY and bCAM screening tools. Caregiver history is an essential component of ED evaluation of older adults with functional dependence and/or cognitive impairment.                                                                                                 |

|                                                  |                                                                                                       |                               |                                                                                                                                                                                                                                                                                                                                                                                                                                                                                                            |    |                                                                                                                                                                                                                                                                                                                                                                                                                                                                                                                                                                                                                                                                                                                                                                    |
|--------------------------------------------------|-------------------------------------------------------------------------------------------------------|-------------------------------|------------------------------------------------------------------------------------------------------------------------------------------------------------------------------------------------------------------------------------------------------------------------------------------------------------------------------------------------------------------------------------------------------------------------------------------------------------------------------------------------------------|----|--------------------------------------------------------------------------------------------------------------------------------------------------------------------------------------------------------------------------------------------------------------------------------------------------------------------------------------------------------------------------------------------------------------------------------------------------------------------------------------------------------------------------------------------------------------------------------------------------------------------------------------------------------------------------------------------------------------------------------------------------------------------|
| Meldon 2020, academic ED; October 2019 –May 2020 | Initial program N = 7718; age ≥ 65 y; 74.9 y mean; Enhanced program N = 1836; age ≥ 65 y; 75.6 y mean | N/R                           | Implantation of an EMR best practices alert for patients aged ≥65 y. Created an EMR alert for patients aged ≥80 y, fall complaint, history of dementia, polypharmacy (≥10 medications recorded), or high ED utilization (>5 visits in 1 y) in addition to a positive delirium screen. For the first part of the study, ED clinicians educated about these risks and about the EMR alert for comprehensive care assessment. Compared the change in comprehensive geriatric assessment pre- or posttraining. | No | The proportion of geriatric evaluations increased a relative 21% (4.3%-5.2%, P = .09). Authors note that the enhanced period occurred during the beginning of the COVID pandemic.                                                                                                                                                                                                                                                                                                                                                                                                                                                                                                                                                                                  |
| Morley 2013, Ireland; hospital                   | N = 35 HIV clinic and ED clinicians                                                                   | Clinician in HIV clinic or ED | Surveyed clinicians about cognitive screening tools used and factors limiting cognitive assessments in the clinical setting                                                                                                                                                                                                                                                                                                                                                                                | No | Participants were asked if an assessment of Orientation in Person, Place and Time (OPPT) was an adequate screening tool for detecting HIV dementias. They were presented with the names of other cognitive screening tools and were asked which they had used previously with HIV-positive patients. MMSE, MoCA screen, the Abbreviated Mental Test (AMT) score, the International HIV Dementia Scale (HIVDS), and the Brief Neurocognitive Screen (BNCS). Thirty-four percent (n = 12) of respondents felt that OPPT was a sufficient screening tool for cognitive assessment. Respondents found lack of time, exposed environment, and lack of privacy the most limiting factors when performing cognitive assessment on patients who present acutely to the ED. |

(continued on next page)

Supplementary Table 2 (continued)

| Study, Location, Time Frame (* in PICO 1 and 2)                   | No. of Patients (Median or Mean Age)              | Inclusion Criteria                                                                                                                                                                                                                                                                                                                                                                   | Exclusion Criteria | Study Design- Timing of Recruitment                                                                                                                                                                                                                                                                                                      | Intervention: Screening Instrument or Tool Studied | Measured for Feasibility, Pragmatic Nature, Timing, Efficiency, etc (Yes/No) | If Y: Measures Cited for Feasibility, Preferences, Duration of Instrument, Efficiency                                                                                                                                                                                                                                                                                                                                                                                                                                  | If N: Points Made by Study About Ease of Use, Speed (Quick, Fast, etc), Setting, Integration Into Routine Care, etc                                |
|-------------------------------------------------------------------|---------------------------------------------------|--------------------------------------------------------------------------------------------------------------------------------------------------------------------------------------------------------------------------------------------------------------------------------------------------------------------------------------------------------------------------------------|--------------------|------------------------------------------------------------------------------------------------------------------------------------------------------------------------------------------------------------------------------------------------------------------------------------------------------------------------------------------|----------------------------------------------------|------------------------------------------------------------------------------|------------------------------------------------------------------------------------------------------------------------------------------------------------------------------------------------------------------------------------------------------------------------------------------------------------------------------------------------------------------------------------------------------------------------------------------------------------------------------------------------------------------------|----------------------------------------------------------------------------------------------------------------------------------------------------|
| Myrstad 2018, Norway; ED; October 2017 –May 2018                  | N = 111; age $\geq 65$ y, 81 y mean               | Patient seen in ED with suspect infection and admitted                                                                                                                                                                                                                                                                                                                               |                    | ED nurses screened patients with qSOFA and 4AT (rapid screening of alertness, cognition, attention and fluctuation of symptoms). Time spent on 4AT was recorded                                                                                                                                                                          | qSOFA and 4AT.                                     | Yes                                                                          | Median time spent on the assessment with 4AT was 2 min (mean 2.6 min). Among 39 patients with a qSOFA point given for altered mental state, 4AT revealed signs of cognitive impairment in 37 (95%). 4AT revealed signs of cognitive impairment in 26 of 72 patients (36%) where qSOFA did not reveal an altered mental state. 4AT is a rapid assessment of cognitive impairment feasible for use in the ER. 4AT improved the assessment of cognitive impairment in patients aged $\geq 65$ y with suspected infection. |                                                                                                                                                    |
| Ngian 2008, Australia; teaching hospital; January 2004-April 2006 | N = 103; age $\geq 70$ y; 83 y mean ( $\pm 6.5$ ) | Patient meeting ASET referral criteria: age $\geq 70$ y, and 2 of the following 5 criteria required to trigger referral: (1) multiple health problems or $>3$ regular medications, (2) history of falls or fall-related injury, (3) $>3$ presentations to ED in the last 6 mo, (4) problems with memory, or (5) patient or caregiver reports recent functional or behavioral change. | N/R                | Study objectives were to review discordant cases (using EMR)— older adult patients deemed for discharge by ED but subsequently admitted following ASET review. These cases were examined with regard to clinical outcomes. ASET contribution was also reviewed with respect to assessment of cognitive, functional, and mobility status. |                                                    | No                                                                           |                                                                                                                                                                                                                                                                                                                                                                                                                                                                                                                        | Assessment of older adult patients by ASET yielded additional information on functional, mobility and cognitive issues that were overlooked by ED. |

This is a review article  
citing the use of the 6-CIT  
screen in primary care,  
outpatient care, and EDs

Yes

The 6-CIT has been shown to be a fast, feasible method for screening for cognitive impairment in older adults in the ED, with a mean completion time of 1.9 min. In a US-based study involving 163 ED patients (mean age 78 y), the 6-CIT demonstrated excellent sensitivity at 95% and specificity at 65% (AUC = 0.930) for cognitive dysfunction based on MMSE scores of  $\leq 23$ . However, this result was achieved using a lower 6-CIT cutoff of 4/5, and there was no randomization between criterion standard testing and screening. Another US research group used the 6-CIT to screen for cognitive impairment in 271 older patients in an urban teaching hospital ED. The psychometric properties of the instrument were not analyzed; however, the researchers claimed to have discovered 46 from a total of 55 cases of cognitive impairment, where no previous history of cognitive impairment existed.

---

(continued on next page)



Supplementary Table 2 (continued)

| Study, Location, Time Frame (* in PICO 1 and 2)           | No. of Patients (Median or Mean Age)         | Inclusion Criteria                                                                                                                                                                                                                                                                                                                                                          | Exclusion Criteria                                                                                                                                                                                                                                                                                                                                          | Study Design- Timing of Recruitment                                                                                                                                                                                                                                                                                                                                                                                              | Intervention: Screening Instrument or Tool Studied | Measured for Feasibility, Pragmatic Nature, Timing, Efficiency, etc (Yes/No) | If Y: Measures Cited for Feasibility, Preferences, Duration of Instrument, Efficiency                                                                                                                                                                                                                                                                                                    | If N: Points Made by Study About Ease of Use, Speed (Quick, Fast, etc), Setting, Integration Into Routine Care, etc                                                                                                                                                          |
|-----------------------------------------------------------|----------------------------------------------|-----------------------------------------------------------------------------------------------------------------------------------------------------------------------------------------------------------------------------------------------------------------------------------------------------------------------------------------------------------------------------|-------------------------------------------------------------------------------------------------------------------------------------------------------------------------------------------------------------------------------------------------------------------------------------------------------------------------------------------------------------|----------------------------------------------------------------------------------------------------------------------------------------------------------------------------------------------------------------------------------------------------------------------------------------------------------------------------------------------------------------------------------------------------------------------------------|----------------------------------------------------|------------------------------------------------------------------------------|------------------------------------------------------------------------------------------------------------------------------------------------------------------------------------------------------------------------------------------------------------------------------------------------------------------------------------------------------------------------------------------|------------------------------------------------------------------------------------------------------------------------------------------------------------------------------------------------------------------------------------------------------------------------------|
| Ouellet 2016*, Canada; teaching EDs; May 2009 –March 2011 | N = 306; age ≥65 y; mean 77.0 ± 7.2 y; 85.3% | Age ≥65 y, be presenting to the ED specifically for a minor traumatic injury (ie, soft tissue/ osseous lesions such as lacerations, contusions, sprains, simple extremity fractures, minor thoracic injuries, or minor head injury), be discharged home within 48 h of the ED visit, be independent in basic activities of daily living in the month prior to the ED visit. | Injuries leading to admission, living in long-term care, diagnosis of dementia, delirium, or confusion at the ED visit, inability to give a verbal consent, to communicate in French or English, to attend follow-up assessments                                                                                                                            | This study aimed at exploring correlates of global cognitive functioning in older adults being evaluated in the context of a consultation in the ED following a minor traumatic injury.                                                                                                                                                                                                                                          | The MoCA was used to assess cognitive function.    | No                                                                           |                                                                                                                                                                                                                                                                                                                                                                                          | Results of multivariate analyses indicate that the variables most strongly associated with lower MoCA scores are being a man, being 85 y or older, having a lower education, being more depressed, being slower in terms of mobility, and reporting serious memory problems. |
| Salen 2009, US; ED; N/R                                   | N = 100; age ≥65 y; 9%                       | Age ≥65 y, English-speaking community-dwelling people seen in a community hospital ED                                                                                                                                                                                                                                                                                       | Presenting for altered mentation, evidence of critical illness as reflected by abnormal vital signs (systolic blood pressure 100 mm Hg, pulse 100 beats/min, temperature 37.8 °C (100 °F), pulse-oximetry 95% on room air), lived in a nursing home or in an assisted-living situation, history of dementia or delirium, or if they refused to participate. | Primary objective of this study was to assess the prevalence of cognitive impairment as reflected by an inability to correctly perform a CDT in older adult patients presenting to the ED for reasons other than altered mental status. Also sought to assess whether an ED cognitive impairment screening program as reflected by an abnormal CDT prompted further evaluation of mental functioning by primary care physicians. | CDT                                                | Yes                                                                          | The CDT seems to be a feasible means for identifying older adult ED patients at risk for cognitive disorders. Routine cognitive screening of older adults with the CDT seems to be well accepted by patients and families, but the sporadic follow-up by PCPs suggests a role for more aggressive ED interventions to delineate the causes of abnormal cognitive screening examinations. |                                                                                                                                                                                                                                                                              |
| Samaras 2010                                              |                                              |                                                                                                                                                                                                                                                                                                                                                                             |                                                                                                                                                                                                                                                                                                                                                             | This is a review article of older adult patients in the ED.                                                                                                                                                                                                                                                                                                                                                                      | CAM and SIS                                        | No                                                                           |                                                                                                                                                                                                                                                                                                                                                                                          | Mentions the need to identify dementia and delirium                                                                                                                                                                                                                          |
| Sanders 1995                                              |                                              |                                                                                                                                                                                                                                                                                                                                                                             |                                                                                                                                                                                                                                                                                                                                                             | This is an editorial regarding a Naughton et al article published in the same issue. The editorial mentions the CAM, a standard OMCT MMSE                                                                                                                                                                                                                                                                                        |                                                    |                                                                              |                                                                                                                                                                                                                                                                                                                                                                                          |                                                                                                                                                                                                                                                                              |
| Sanders 2007                                              |                                              |                                                                                                                                                                                                                                                                                                                                                                             |                                                                                                                                                                                                                                                                                                                                                             | The article is a commentary.                                                                                                                                                                                                                                                                                                                                                                                                     |                                                    |                                                                              |                                                                                                                                                                                                                                                                                                                                                                                          |                                                                                                                                                                                                                                                                              |

|                                                                                                     |                                                                                                                                 |                                                          |                                                                                                                                                                                                                                                                                                                                                                                                                                   |                                                                                                                                                                                                                                       |                                                                                                                                                                                                                                                                                                                                    |     |                                                                                                                                                                                                                                                                                                                                                                                                                                               |
|-----------------------------------------------------------------------------------------------------|---------------------------------------------------------------------------------------------------------------------------------|----------------------------------------------------------|-----------------------------------------------------------------------------------------------------------------------------------------------------------------------------------------------------------------------------------------------------------------------------------------------------------------------------------------------------------------------------------------------------------------------------------|---------------------------------------------------------------------------------------------------------------------------------------------------------------------------------------------------------------------------------------|------------------------------------------------------------------------------------------------------------------------------------------------------------------------------------------------------------------------------------------------------------------------------------------------------------------------------------|-----|-----------------------------------------------------------------------------------------------------------------------------------------------------------------------------------------------------------------------------------------------------------------------------------------------------------------------------------------------------------------------------------------------------------------------------------------------|
| Schnitker 2015*,<br>Australia; ED;<br>2012-2013                                                     | N = 580; age ≥<br>70 y; 80.3 ± 6.7 y;<br>33%                                                                                    | Age ≥70 y, seen at one<br>of 4 hospitals in<br>Australia | (1) Stayed >2 h in ED<br>before the research<br>nurse was available to<br>approach them; (2)<br>were severely ill; (3)<br>had consented for the<br>study during a<br>previous ED visit; (4)<br>required an<br>interpreter and<br>where no suitable<br>interpreter could be<br>found in a timely<br>manner (2 h); or (5)<br>who were not able to<br>participate in the<br>planned phone<br>follow-up (7 and 28 d<br>post ED visit) | The study team assessed 11 OMCT<br>process quality indicators                                                                                                                                                                         | No                                                                                                                                                                                                                                                                                                                                 |     | As it is considered currently, the<br>OMCT is a cognitive screening<br>tool with the most optimal<br>psychometric properties<br>tested (ie, MMSE was used as<br>the reference standard) in the<br>older ED population                                                                                                                                                                                                                         |
| Schoenenberger<br>2014                                                                              |                                                                                                                                 |                                                          |                                                                                                                                                                                                                                                                                                                                                                                                                                   | The article discusses<br>geriatric screening/<br>assessment tools: Short<br>blessed test, CAM, Timed<br>up and go, ADL, EGS<br>(discussed in article<br>below)                                                                        | No                                                                                                                                                                                                                                                                                                                                 |     |                                                                                                                                                                                                                                                                                                                                                                                                                                               |
| Schoenenberger<br>2014,<br>Switzerland;<br>University<br>hospital ED; June<br>2012–February<br>2013 | N = 1547 (752<br>control, 795<br>screening); age<br>≥75 y; 82.8 ±<br>5.1 y (control),<br>82.7 ± 5 y<br>(screening); N/R;<br>N/R | Age ≥75 y, ED patient                                    | None                                                                                                                                                                                                                                                                                                                                                                                                                              | Authors developed a novel<br>multidimensional EGS<br>tool (has 15 questions).<br>ED physicians were<br>trained in its use during<br>the control period, June–<br>October 2012. October<br>2012–June 2013 was the<br>screening period. | The tool met the<br>following<br>prerequisites: (1) EGS<br>is multidimensional<br>and covers relevant<br>domains of geriatric<br>problems; (2) EGS<br>uses validated<br>instruments; and (3)<br>EGS must be feasible<br>in an ED. The domains<br>were relevant for<br>older ED patients:<br>cognition, falls,<br>mobility, and ADL | Yes | EGS took <5 min to<br>perform in most (85.8%)<br>cases. Of the 70 invited<br>ED physicians, 41<br>(64.1%) returned the<br>questionnaire that<br>asked about their<br>experience with the<br>EGS. Most responders<br>agreed or partially<br>agreed that EGS<br>domains are suited to<br>detect geriatric<br>problems: 73.0% agreed<br>or partially agreed for<br>cognition; 77.8%, for<br>falls; 75.0%, for<br>mobility; and 72.2%, for<br>ADL |

(continued on next page)

Supplementary Table 2 (continued)

| Study, Location, Time Frame (* in PICO 1 and 2) | No. of Patients (Median or Mean Age)                                    | Inclusion Criteria                     | Exclusion Criteria | Study Design- Timing of Recruitment                                       | Intervention: Screening Instrument or Tool Studied                                                                              | Measured for Feasibility, Pragmatic Nature, Timing, Efficiency, etc (Yes/No) | If Y: Measures Cited for Feasibility, Preferences, Duration of Instrument, Efficiency                                                                                                                                                                                                                                                                                                                                                                                                                                                                                                                                                                                                                                                                                                                                                                                                                                    | If N: Points Made by Study About Ease of Use, Speed (Quick, Fast, etc), Setting, Integration Into Routine Care, etc |
|-------------------------------------------------|-------------------------------------------------------------------------|----------------------------------------|--------------------|---------------------------------------------------------------------------|---------------------------------------------------------------------------------------------------------------------------------|------------------------------------------------------------------------------|--------------------------------------------------------------------------------------------------------------------------------------------------------------------------------------------------------------------------------------------------------------------------------------------------------------------------------------------------------------------------------------------------------------------------------------------------------------------------------------------------------------------------------------------------------------------------------------------------------------------------------------------------------------------------------------------------------------------------------------------------------------------------------------------------------------------------------------------------------------------------------------------------------------------------|---------------------------------------------------------------------------------------------------------------------|
| Shenkin 2019, UK; ED and inpatient; not stated  | N = 785; age ≥70 y; mean age 81.4 y (SD 6.4); 9% with known dementia; 0 | Patients aged ≥70 y in ED or inpatient |                    | Participants assessed within 12 h of coming to ED or 96 h as an inpatient | Delirium Rating Scale –Revised-98, CAM, 4AT ( <a href="http://www.the4AT.com">www.the4AT.com</a> ) 4AT takes <2 min to complete | Yes                                                                          | Compared the diagnostic accuracy of the 4AT to the other screens for delirium. The 4AT had an AUC of 0.90. The 4AT had specificity of 95% (95% CI 92-97) and sensitivity of 76% (95% CI 61-87). The CAM had specificity of 100% (95% CI 98-100) and sensitivity of 40% (95% CI 26-57). Patients with positive 4AT had longer lengths of stay (median 5 d, IQR 2.0-14.0) than negative 4AT (median 2 d, IQR 1.0-6.0) and higher mortality. Cognitive test items of the 4AT were highly specific (AMT4 score 2: 97% 94%-98%); attention score of 2: 98% (96%-99%); but showed lower sensitivity (AMT4 score 2: 47% 32%-62%); attention score of 2: 62% (36%-83%) in detecting existing dementia. Conclusions: The 4AT is a rapid delirium assessment instrument that is feasible in routine care, including with patients with dementia, which has good diagnostic accuracy for delirium for acutely unwell older patients |                                                                                                                     |

The objective was to review published evidence on the Rapid Assessment Interface and Discharge (RAID) service model, examining the strengths and weaknesses of the service design, outcome, and effectiveness. The RAID service has shown quality improvement in the care of older people by reducing their length of stay, avoiding their admission to acute hospital beds, and discharging them in increased numbers back to their original place of residence, rather than an institution or care home. In addition, the RAID model has been shown to reduce the readmission rate after discharge by 65% in comparison with a pre-RAID group. The psychiatric liaison service can support the management of behavioral and psychological symptoms in patients with dementia; an audit of antipsychotic prescriptions for people with dementia has showed a 52% reduction in antipsychotic prescriptions for people with dementia between 2008 and 2011. The RAID service could have contributed to reduced antipsychotic prescriptions, but this was not actually studied as part of the evaluation.

No

The RAID service has shown quality improvement in the care of older people by reducing their length of stay, avoiding their admission to acute hospital beds, and discharging them in increased numbers back to their original place of residence, rather than an institution or care home. In addition, the RAID model has been shown to reduce the readmission rate after discharge by 65% in comparison with a pre-RAID group. The psychiatric liaison service can support the management of behavioral and psychological symptoms in patients with dementia; an audit of antipsychotic prescriptions for people with dementia has showed a 52% reduction in antipsychotic prescriptions for people with dementia between 2008 and 2011. The RAID service could have contributed to reduced antipsychotic prescriptions, but this was not actually studied as part of the evaluation.

(continued on next page)

**Supplementary Table 2** (continued)

| Study, Location, Time Frame (* in PICO 1 and 2)                   | No. of Patients (Median or Mean Age)                   | Inclusion Criteria                                                                     | Exclusion Criteria | Study Design- Timing of Recruitment                                                                                                                                                                              | Intervention: Screening Instrument or Tool Studied                              | Measured for Feasibility, Pragmatic Nature, Timing, Efficiency, etc (Yes/No) | If Y: Measures Cited for Feasibility, Preferences, Duration of Instrument, Efficiency                                                                                                                                                                                                                                               | If N: Points Made by Study About Ease of Use, Speed (Quick, Fast, etc), Setting, Integration Into Routine Care, etc                                                                                                                                                      |
|-------------------------------------------------------------------|--------------------------------------------------------|----------------------------------------------------------------------------------------|--------------------|------------------------------------------------------------------------------------------------------------------------------------------------------------------------------------------------------------------|---------------------------------------------------------------------------------|------------------------------------------------------------------------------|-------------------------------------------------------------------------------------------------------------------------------------------------------------------------------------------------------------------------------------------------------------------------------------------------------------------------------------|--------------------------------------------------------------------------------------------------------------------------------------------------------------------------------------------------------------------------------------------------------------------------|
| Stair 2007*, Urban teaching hospital, ED, June 2002 –October 2003 | N = 684, age $\geq 18$ y, mean $48 \pm 18$ y, N/R, 0   | Age $\geq 18$ y, speak English or Spanish, ability to answer questions                 |                    | Research assistants would ask the participants, "How many years of school have you completed?" then would flip a coin to determine if MMSE or QCS would be asked first. Time to complete both tests was recorded | MMSE or QCS                                                                     | Yes                                                                          | Researchers found that the QCS required less time to complete than the MMSE ( $2.7 \pm 1.3$ vs $5.1 \pm 1.9$ mean; $P < .001$ ). Correlation of QCS and MMSE scores was fair, with Pearson $r = 0.61$ (95% CI 0.56-0.66). Conclusions: The QCS can be administered more quickly than the MMSE and is easier to administer in the ED |                                                                                                                                                                                                                                                                          |
| Sunkara 2019, NY; ED; March 1–July 1, 2018                        | N = 418, age $\geq 75$ y, 41.15% screened positive, 80 | ED patients aged $\geq 75$ y likely to be discharged home, English or Spanish speaking |                    | Not reported                                                                                                                                                                                                     | Mini-Cog (if participant could answer), IQCODE if participant could not respond | No                                                                           |                                                                                                                                                                                                                                                                                                                                     | Cognitive impairment screening is feasible in the ED and many individuals screen positive. Use of a volunteer workforce may be a feasible interim step to implementing a sustainable program while increasing learners' exposure to positive geriatric care experiences. |

|                                                   |                                             |                                                                                                                           |                                                                                                                                                                       |                                                                                                                                                                                                                    |                     |                                                                                                                                                                                                                                                                                                                                                |                                                                                                                                                                                                                                             |
|---------------------------------------------------|---------------------------------------------|---------------------------------------------------------------------------------------------------------------------------|-----------------------------------------------------------------------------------------------------------------------------------------------------------------------|--------------------------------------------------------------------------------------------------------------------------------------------------------------------------------------------------------------------|---------------------|------------------------------------------------------------------------------------------------------------------------------------------------------------------------------------------------------------------------------------------------------------------------------------------------------------------------------------------------|---------------------------------------------------------------------------------------------------------------------------------------------------------------------------------------------------------------------------------------------|
| Taylor 2018                                       |                                             | Older adults aged $\geq 65$ y presenting to the ED                                                                        | Evaluation of an assessment instrument as the primary outcome                                                                                                         | Scoping review identified 6 measures used for cognitive and delirium screening instruments: AMT, CAM, Blessed Orientation-memory Concentration (BOMC), MMSE, Mini-Cog, Short Portable Status Questionnaire (SPMSQ) |                     | Only 2 of the screens, Mini-Cog and MMSE, have been tested for use in ED. Mini-Cog has a drawing section that is a limitation for use in ED. There was no standard time to administer one of the screens. Authors note that doing them early in a patient's visit would help provide needed information that could impact patient disposition. |                                                                                                                                                                                                                                             |
|                                                   |                                             | Administration of a functional and/or cognition assessment instrument whilst the patient is in any part of the ED setting | •Studies that target an intervention of 1 primary diagnostic criterion eg stroke                                                                                      |                                                                                                                                                                                                                    |                     |                                                                                                                                                                                                                                                                                                                                                |                                                                                                                                                                                                                                             |
|                                                   |                                             | •Clinical assessment tools addressing any aspect of functional ability, and/or cognition assessment                       | •Assessments or interventions not performed in the ED environment                                                                                                     |                                                                                                                                                                                                                    |                     |                                                                                                                                                                                                                                                                                                                                                |                                                                                                                                                                                                                                             |
|                                                   |                                             | •The study must include an intervention of any description resulting from the outcome of the instrument administration    | •Studies only targeting residents of residential aged care facilities (RACFs)                                                                                         |                                                                                                                                                                                                                    |                     |                                                                                                                                                                                                                                                                                                                                                |                                                                                                                                                                                                                                             |
|                                                   |                                             | •There must be a measured outcome as a result of the ED-based intervention                                                |                                                                                                                                                                       |                                                                                                                                                                                                                    |                     |                                                                                                                                                                                                                                                                                                                                                |                                                                                                                                                                                                                                             |
| Wilber 2006                                       |                                             |                                                                                                                           |                                                                                                                                                                       | Not a study. Article described mental status screening tests                                                                                                                                                       | No                  | MMSE not useful in ED as difficult to perform, patients may have vision, hearing or writing limitation, takes a median of 6 min to do. Article mentioned screens studied for ED use including the OMCT, CDT, Mini-Cog, and SIS                                                                                                                 |                                                                                                                                                                                                                                             |
| Wilber 2005, Summa Health System's; ED; fall 2003 | 149; age $\geq 65$ y; mean age 75 y; 23%, 0 | Age $\geq 65$ y, English speaking                                                                                         | Unable or unwilling to perform testing, those who were medically unstable, and those who received medications during the study that could affect their mental status. | Treating physician conducted SIS or Mini-Cog as directed, $\geq 30$ min later an investigator conducted MMSE                                                                                                       | SIS, Mini-Cog, MMSE | Yes                                                                                                                                                                                                                                                                                                                                            | SIS agreed with MMSE 88%, and Mini-Cog agreed 83%. Previous study showed patients completed the SIS in $<1$ min (range, 0.5–3.5 min) and Mini-Cog took 1.5 min (0.5–5 min). MMSE takes a median of 5.5 min (range, 3.5–14 min) to complete. |

(continued on next page)

**Supplementary Table 2** (continued)

| Study, Location, Time Frame (* in PICO 1 and 2)                                                                                                              | No. of Patients (Median or Mean Age)                             | Inclusion Criteria         | Exclusion Criteria                                                                                                                                                                                                                                              | Study Design- Timing of Recruitment                                                                                                                                                                            | Intervention: Screening Instrument or Tool Studied | Measured for Feasibility, Pragmatic Nature, Timing, Efficiency, etc (Yes/No) | If Y: Measures Cited for Feasibility, Preferences, Duration of Instrument, Efficiency | If N: Points Made by Study About Ease of Use, Speed (Quick, Fast, etc), Setting, Integration Into Routine Care, etc                                                                                                                                                                                                                                                                                                                                                                                                           |
|--------------------------------------------------------------------------------------------------------------------------------------------------------------|------------------------------------------------------------------|----------------------------|-----------------------------------------------------------------------------------------------------------------------------------------------------------------------------------------------------------------------------------------------------------------|----------------------------------------------------------------------------------------------------------------------------------------------------------------------------------------------------------------|----------------------------------------------------|------------------------------------------------------------------------------|---------------------------------------------------------------------------------------|-------------------------------------------------------------------------------------------------------------------------------------------------------------------------------------------------------------------------------------------------------------------------------------------------------------------------------------------------------------------------------------------------------------------------------------------------------------------------------------------------------------------------------|
| Wilber 2008*, Summa Health System's Akron City Hospital, Washington University, Barnes-Jewish Hospital, The Cleveland Clinic; ED; January 2006 –January 2007 | 352 participants, age ≥65 y, mean age 77 ± 8; 32% 0 care partner | Age 65 y; English speaking | Receiving medications that may have affected their mental status (narcotics, antiemetics, or benzodiazepines), were critically ill, were unable to consent or cooperate with data acquisition, were previously enrolled, or refused to complete the questioning | At Sites 1 and 3, the SIS was administered first, and the MMSE was administered a minimum of 30 min later. At Site 2, the MMSE was administered first, and the SIS was administered a minimum of 30 min later. | MMSE, SIS                                          | No                                                                           |                                                                                       | Compared sensitivity and specificity of SIS to MMSE. Overall, the SIS was 63% sensitive and 81% specific; the NPV was 83% and the PPV was 60% (Table 1). The overall agreement between the 2 tests was 75%. However, we believe that the SIS, testing temporal orientation and recall, is quick and easy for<br><br>EPs to incorporate into their physical examination. It provides an objective measure of cognition, as opposed to the unstructured evaluation of cognition by clinical gestalt (often expressed as A&Ox3). |

|                                                                           |                                                                                                                          |                                                                   |                                                                                                                                                                    |                                                                                                                                                                                                    |                                                                                                                                                   |     |    |                                                                                                                                                                                                                                                                                                                                                                                                                                                                                                                                                                                                                                                                                                                                                                                                                                                                                                                                                                               |
|---------------------------------------------------------------------------|--------------------------------------------------------------------------------------------------------------------------|-------------------------------------------------------------------|--------------------------------------------------------------------------------------------------------------------------------------------------------------------|----------------------------------------------------------------------------------------------------------------------------------------------------------------------------------------------------|---------------------------------------------------------------------------------------------------------------------------------------------------|-----|----|-------------------------------------------------------------------------------------------------------------------------------------------------------------------------------------------------------------------------------------------------------------------------------------------------------------------------------------------------------------------------------------------------------------------------------------------------------------------------------------------------------------------------------------------------------------------------------------------------------------------------------------------------------------------------------------------------------------------------------------------------------------------------------------------------------------------------------------------------------------------------------------------------------------------------------------------------------------------------------|
| Wilding 2016*, Ontario Canada; ED; January 1, 2010, to August 31, 2010    | N = 238; age $\geq 75$ y; mean age 81.9 y; 13.4%; 0                                                                      | Patients aged $\geq 75$ y with no history of cognitive impairment | Medically unstable; cognitively impaired; not living in Ottawa; reside in nursing home; non-English or French speaking; hearing/visual impairment                  | MMSE, O3DY, and AFT. MMSE and O3DY were administered followed by AFT                                                                                                                               | MMSE, O3DY, and AFT                                                                                                                               | No  | No | The O3DY Scale demonstrated a sensitivity of 93.8% (95% CI 77.8–98.9) and a specificity of 72.8% (95% CI 66.1–78.7). The MMSE and O3DY scale showed agreement in 75.6% of cases. An AFT score $< 15$ demonstrated a sensitivity of 90.6% (95% CI 73.8–97.5) and specificity of 39.3% (95% CI 32.7–46.4). Using a cutoff of $< 10$ for the AFT resulted in a lower sensitivity of 62.5% (95% CI 43.7–78.3) but greater specificity of 78.2% (95% CI 71.8–83.5). The MMSE and the AFT showed agreement in 46.2% and 76.1% of cases with cutoffs of $< 15$ and $< 10$ , respectively. The O3DY scale is a feasible screening tool for cognitive impairment in older adult patients presenting to the ED. It is highly practical for use in the time-pressured ED environment, and it does not require paper, pen, or stopwatch. It showed high sensitivity and moderate specificity compared with the MMSE. The AFT did not perform as well, with a much diminished specificity. |
| Wilkinson 2018, Canada; ED                                                | N = 147; age 70–94 y                                                                                                     |                                                                   |                                                                                                                                                                    | A “Whack-a-mole” style computer game was created to discern inhibition ability in a geriatric population in the ED. The results of the game were then compared to MMSE, MoCA, and CAM evaluations. | The developed game had a correlation to MMSE, MOCA, or CAM, determined as, respectively, $-0.558$ , $-0.339$ , and $0.565$ (all with $P < .001$ ) | No  | No | No                                                                                                                                                                                                                                                                                                                                                                                                                                                                                                                                                                                                                                                                                                                                                                                                                                                                                                                                                                            |
| Yamamoto 2019, Japan; hospital ED; October 1, 2014, to September 30, 2015 | N = 885; age $> 50$ y; mean age 78.9 y; 10% history of dementia ( $n = 89$ , mean age $85.0 \pm 6.53$ y); 0 care partner | Non–critically ill patients aged $> 50$ y admitted to the ED      | Admitted with critical diseases, receiving sedative medication, unable to consent, or who refused to participate, and those with more than 1 wk of hospitalization | Participants approached in ED                                                                                                                                                                      | Short-term memory recall test (STMT-R) a revised version of the STMT                                                                              | Yes |    | Short-term memory recall test (STMT-R), The test is normally completed within 2 min, but some participants were unable to complete the questionnaire within 5 min                                                                                                                                                                                                                                                                                                                                                                                                                                                                                                                                                                                                                                                                                                                                                                                                             |

(continued on next page)



Supplementary Table 2 (continued)

| Study, Location, Time Frame (* in PICO 1 and 2) | No. of Patients (Median or Mean Age)  | Inclusion Criteria           | Exclusion Criteria | Study Design- Timing of Recruitment                                                                                                                                                          | Intervention: Screening Instrument or Tool Studied                                                                                                                                                                                                                                                                                                                             | Measured for Feasibility, Pragmatic Nature, Timing, Efficiency, etc (Yes/No) | If Y: Measures Cited for Feasibility, Preferences, Duration of Instrument, Efficiency | If N: Points Made by Study About Ease of Use, Speed (Quick, Fast, etc), Setting, Integration Into Routine Care, etc                                                                                                                                                                                                                                                                                                                                                                                                                                                                                                                                        |
|-------------------------------------------------|---------------------------------------|------------------------------|--------------------|----------------------------------------------------------------------------------------------------------------------------------------------------------------------------------------------|--------------------------------------------------------------------------------------------------------------------------------------------------------------------------------------------------------------------------------------------------------------------------------------------------------------------------------------------------------------------------------|------------------------------------------------------------------------------|---------------------------------------------------------------------------------------|------------------------------------------------------------------------------------------------------------------------------------------------------------------------------------------------------------------------------------------------------------------------------------------------------------------------------------------------------------------------------------------------------------------------------------------------------------------------------------------------------------------------------------------------------------------------------------------------------------------------------------------------------------|
| Zun 1986, mailed survey                         | N = 170 Board-certified ED physicians | ED Board-certified physician | N/R                | Random sample of 120 of 1174 American Board of Emergency Medicine –certified emergency physicians and a validation group of 50 Board-certified ED physicians were surveyed by questionnaire. | Authors developed a questionnaire to determine the indications, the amount of time necessary to evaluate mental status, the content of the mental status examination (MSE) used, and the ideal characteristics of a short, standardized MSE. The Strub and Black's Composite Mental Status Examination (CMSE) was used as the standard example for answering the questionnaire | Yes                                                                          | 72% of respondents said they take <5 min on the MSE                                   | No                                                                                                                                                                                                                                                                                                                                                                                                                                                                                                                                                                                                                                                         |
| Zun 1988                                        |                                       |                              |                    |                                                                                                                                                                                              |                                                                                                                                                                                                                                                                                                                                                                                | No                                                                           | N                                                                                     | Some physicians view the mental status evaluation as a series of odd maneuvers and questions that appear time-consuming and of questionable clinical significance.<br>"Emergency departments are places where physicians have limited time to examine patients. Texts in emergency medicine have advocated the need to perform formal mental status examinations. However, many physicians find the formal mental status examination time-consuming and cumbersome."<br>An extensive test is rarely necessary in the ED; rather a short test of cognitive function, such as the Cognitive Capacity Screening Examination or MMSE, may be more appropriate. |

4AT, 4 A's Test; AD8, Alzheimer's Disease-8; ADL, activities of daily living; ADRD, Alzheimer's disease and related dementias; AFT, Animal Fluency Test; AMT, Abbreviated Mental Test; APOP, acutely presenting older patient; ASET, Aged Care Service Emergency Teams; AUC, area under the curve; BAS, Brief Alzheimer's Screen; BRIGHT, Brief Risk Identification for Geriatric Health Tool; cAD8, caregiver-completed Alzheimer's Disease-8; CAM-ICU, Confusion Assessment Method-Intensive Care Unit; CDT, Clock-Drawing Test; CFS, clinical frailty scale; ED, emergency department; EGS, Emergency Geriatric Screening; GCS, Glasgow Coma Scale; IQCODE, Informant Questionnaire for Cognitive Decline; LOS, length of stay; MMSE, Mini-Mental State Examination; MoCA, Montreal Cognitive Assessment; N/A, not applicable; NPV, negative predictive value; N/R, not reported; OARS, Older American Resources and Services scale; O3DY, Ottawa 3DY; OMCT, Orientation Memory Concentration Test; PDSA, plan-do-study-act; PPV, positive predictive value; QCS, Quick Confusion Scale; qSOFA, Quick Sequential Organ Failure Assessment; RA, research assistant; SBT, Short Blessed Test; 6-CIT; Six-Item Cognitive Impairment Test; SIS, Six Item Screener; sMMSE, standardized MMSE; TAP, Treatment Acceptability and Preferences.

**Appendix 1. The GEAR 2.0-ADC Network Authors**

| Names                     | Degrees          |
|---------------------------|------------------|
| Aggarawal, Neelum         | MD               |
| Allore, Heather           | PhD              |
| Amy Aloysi                | MD, MPH          |
| Belleville, Michael       | HS               |
| Bellolio, M Fernanda      | MD               |
| Betz, Marian (Emmy)       | MD, MPH          |
| Biese, Kevin              | MD, MAT          |
| Brandt, Cynthia           | MD, MPH          |
| Bruursema, Stacey         | LMSW             |
| Carnahan, Ryan            | PharmD, MS, BCPP |
| Carpenter, Christopher    | MD, MSC          |
| Carr, David               | MD               |
| Chin-Hansen, Jennie       | MS, RN, FAAN     |
| Daven, Morgan             | MA               |
| Degeys, Nida              | MD               |
| Dresden, M Scott          | MD, MS           |
| Dussetschleger, Jeffrey   | DDS, MPH         |
| Ellenbogen, Michael       | AA               |
| Falvey, Jason             | DPT, PhD         |
| Foster, Beverley          | HS               |
| Gettel, Cameron           | MD               |
| Gifford, Angela           | MA               |
| Gilmore-Bykovskiy, Andrea | PhD, RN          |
| Goldberg, Elizabeth       | MD, ScM          |
| Han, Jin                  | MD, MSc          |
| Hardy, James              | MD               |
| Hastings, S. Nicole       | MD               |
| Hirshon, Jon Mark         | MD, PhD, MPH     |
| Hoang, Ly                 | BS               |
| Hogan, Tess               | MD               |
| Hung, William             | MD, MPH          |
| Hwang, Ula                | MD, MPH          |
| Isaacs, Eric              | MD               |
| Jaspal, Naveena           | BA               |
| Jobe, Deb                 | BS               |
| Johnson, Jerry            | MD               |
| Kelly, Kathleen (Kathy)   | MPA              |
| Kennedy, Maura            | MD               |
| Kind, Amy                 | MD, PhD          |
| Leggett, Jesseca          | BS               |
| Malone, Michael           | MD               |
| Moccia, Michelle          | DNP              |
| Moreno, Monica            | BS               |
| Morrow-Howell, Nancy      | MSW, PhD         |
| Nowroozpoor, Armin        | MD               |
| Ohuabunwa, Ugochi         | MD               |
| Oiyemhonian, Brenda       | MD, MHSA, MPH    |
| Perry, William            | PhD              |
| Prusacz, Beth             | PhD, MSW         |
| Resendez, Jason           | BA               |
| Rising, Kristen           | MD               |
| Sano, Mary                | PhD              |
| Savage, Bob               | HS               |
| Shah, Manish              | MD, MPH          |
| Suyama, Joe               | MD, FACEP        |
| Swartzberg, Jeremy        | MD               |
| Taylor, Zachary           | BS               |
| Vaishal, Tolia            | MD, MPH          |
| Vann, Allan               | EdD              |
| Webb, Teresa              | RN               |
| Weintraub, Sandra         | PhD              |
